# Supplementary material for: Design, Synthesis and Preliminary Evaluation of the Cytotoxicity and Antibacterial Activity of Novel Triphenylphosphonium Derivatives of Betulin
Source: MDPI journal article supplement (doi:10.3390/molecules27165156), 2022-08-12
Supplement: s1 [file s1]

# Design, Synthesis and Preliminary Evaluation of the Cytotoxicity and Antibacterial Activity of Novel Triphenylphosphonium Derivatives of Betulin

Mirosława Grymel<sup>1,2,3\*</sup>, Anna Lalik<sup>3,4</sup>, Alicja Kazek-Kęsik<sup>5</sup>, Marietta Szewczyk<sup>1</sup>, Patrycja Grabiec<sup>1</sup>, and Karol Erfurt<sup>2</sup>

<sup>1</sup> Department of Organic Chemistry, Bioorganic Chemistry and Biotechnology, Silesian University of Technology, B. Krzywoustego 4, 44-100 Gliwice, Poland

<sup>2</sup> Department of Chemical Organic Technology and Petrochemistry, Silesian University of Technology, B. Krzywoustego 4, 44-100 Gliwice, Poland

<sup>3</sup> Biotechnology Center, Silesian University of Technology, B. Krzywoustego 8, 44-100 Gliwice, Poland

<sup>4</sup> Department of Systems Biology and Engineering, Silesian University of Technology, Akademicka 16, 44-100 Gliwice, Poland

<sup>5</sup> Department of Inorganic, Analytical Chemistry and Electrochemistry, Faculty of Chemistry, Silesian University of Technology, Krzywoustego 6, 44-100 Gliwice, Poland

\* Correspondence: mirosława.grymel@polsl.pl; Tel.: +48 032-237-1873 (M.G.)

Received: date; Accepted: date; Published: date

## TABLE OF CONTENTS

|                                                                                                                                          |         |
|------------------------------------------------------------------------------------------------------------------------------------------|---------|
| <sup>1</sup> H, <sup>13</sup> C NMR spectra of betulin and analogues <b>2-5</b> .....                                                    | S2-S10  |
| <sup>1</sup> H, <sup>13</sup> C NMR spectra of bromides of betulin <b>6a-6f</b> .....                                                    | S11-S23 |
| <sup>1</sup> H, <sup>13</sup> C, <sup>31</sup> P NMR spectra of triphenylphosphonium derivatives of betulin <b>7a-7f</b> .....           | S24-S42 |
| <sup>1</sup> H, <sup>13</sup> C NMR spectra of bromides of betulin <b>8a-8c</b> .....                                                    | S43-S48 |
| <sup>1</sup> H, <sup>13</sup> C, <sup>31</sup> P NMR spectra of <i>bistriphenylphosphonium</i> derivatives of betulin <b>9a-9c</b> ..... | S49-S57 |
| FT-IR spectra for selected compounds.....                                                                                                | S58-S72 |

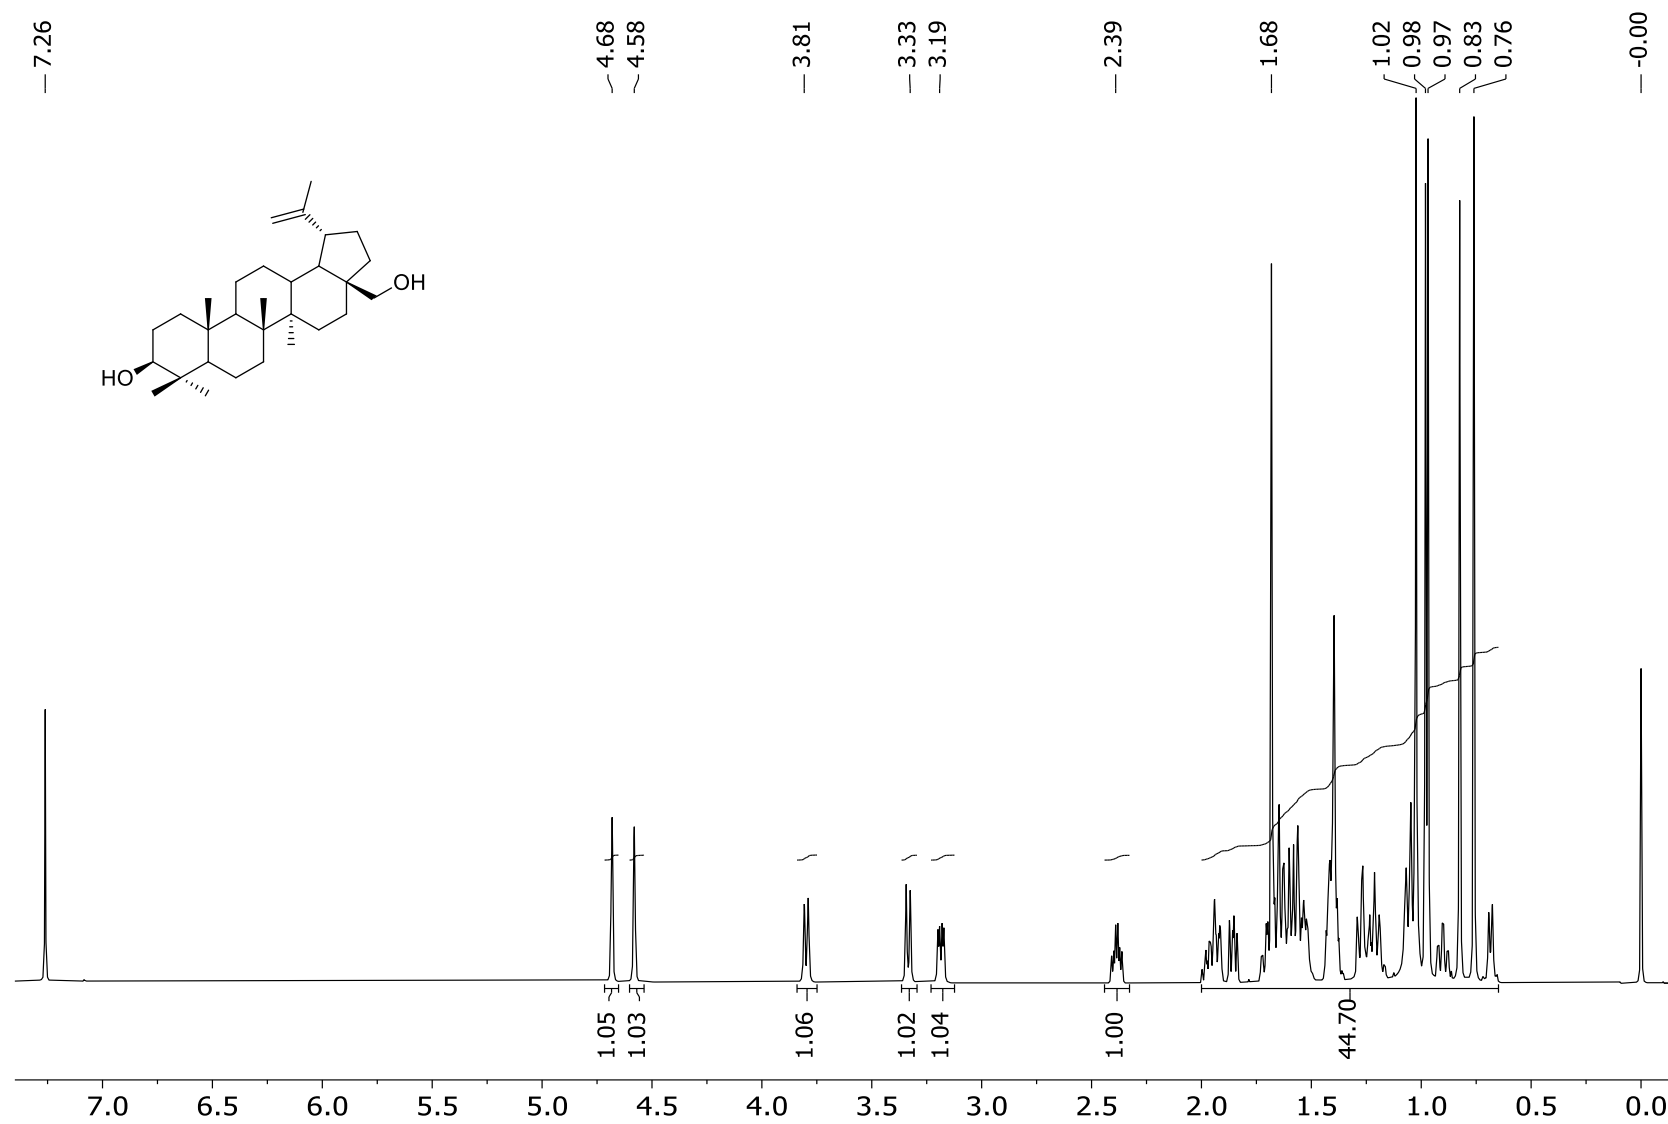

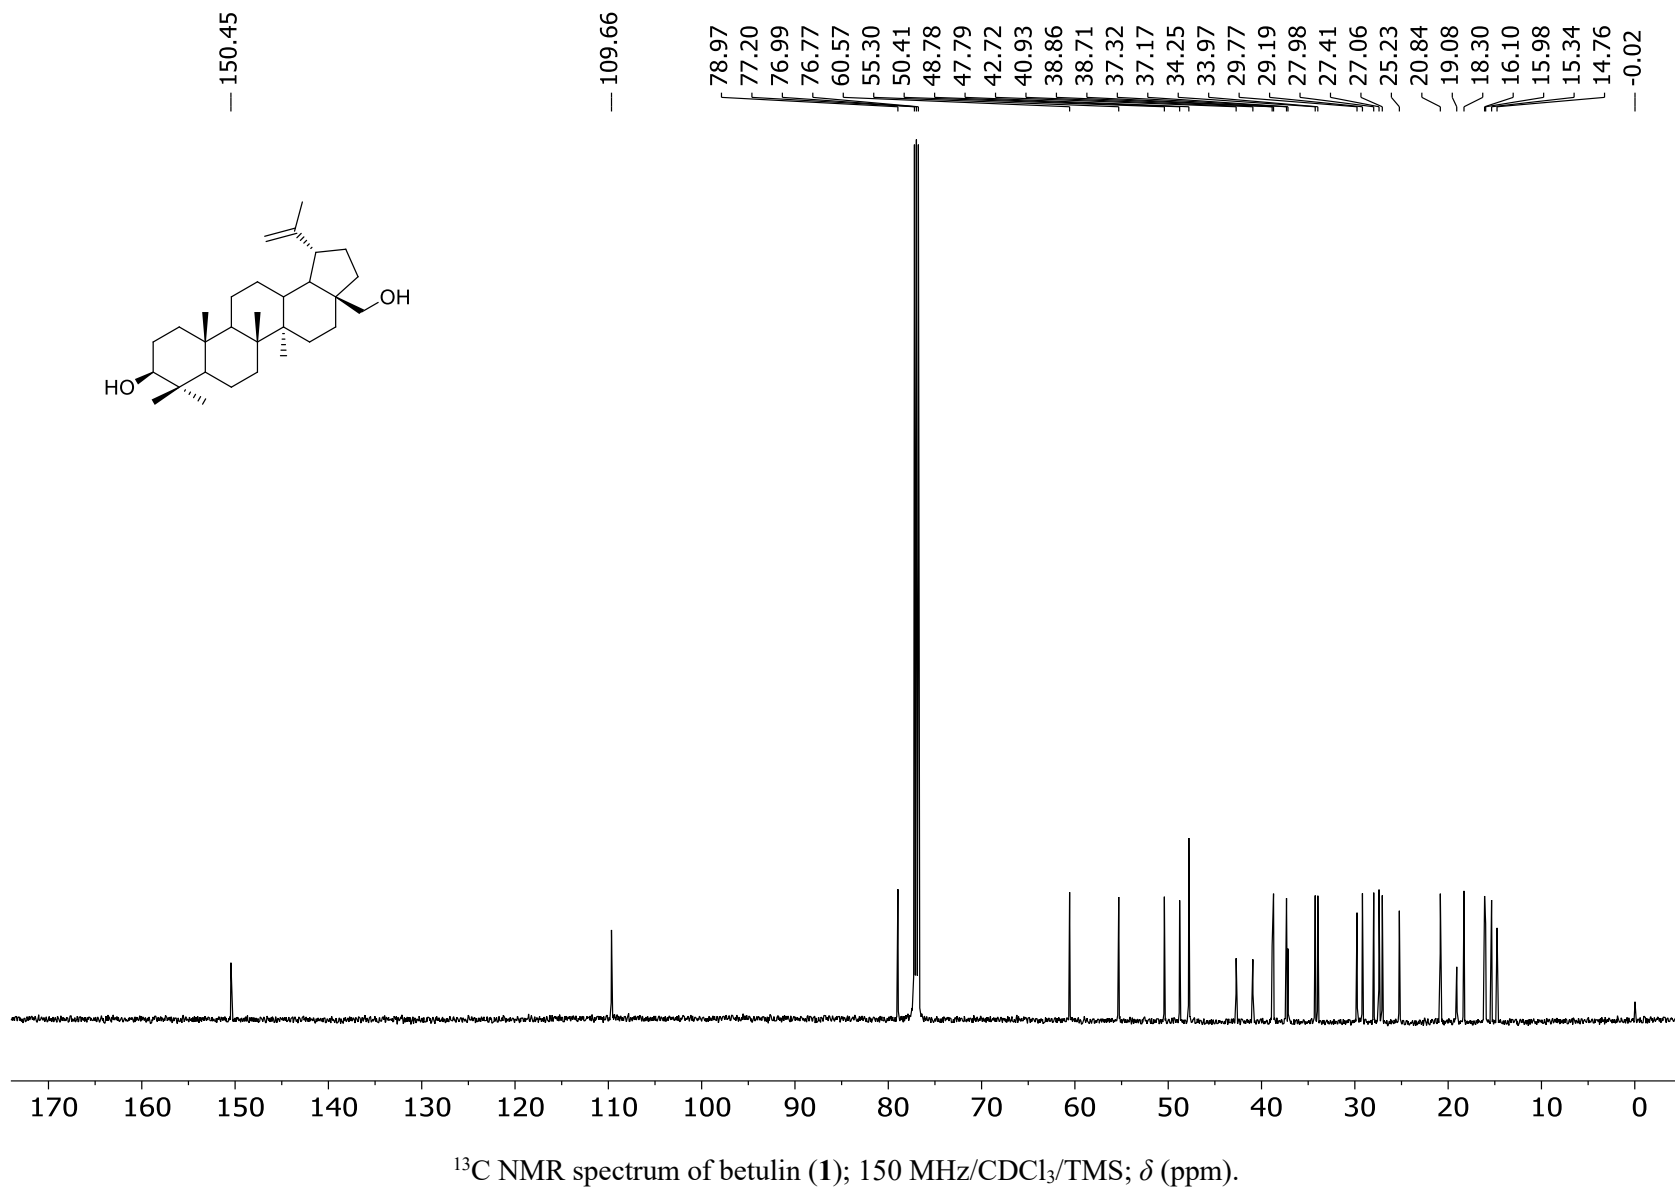

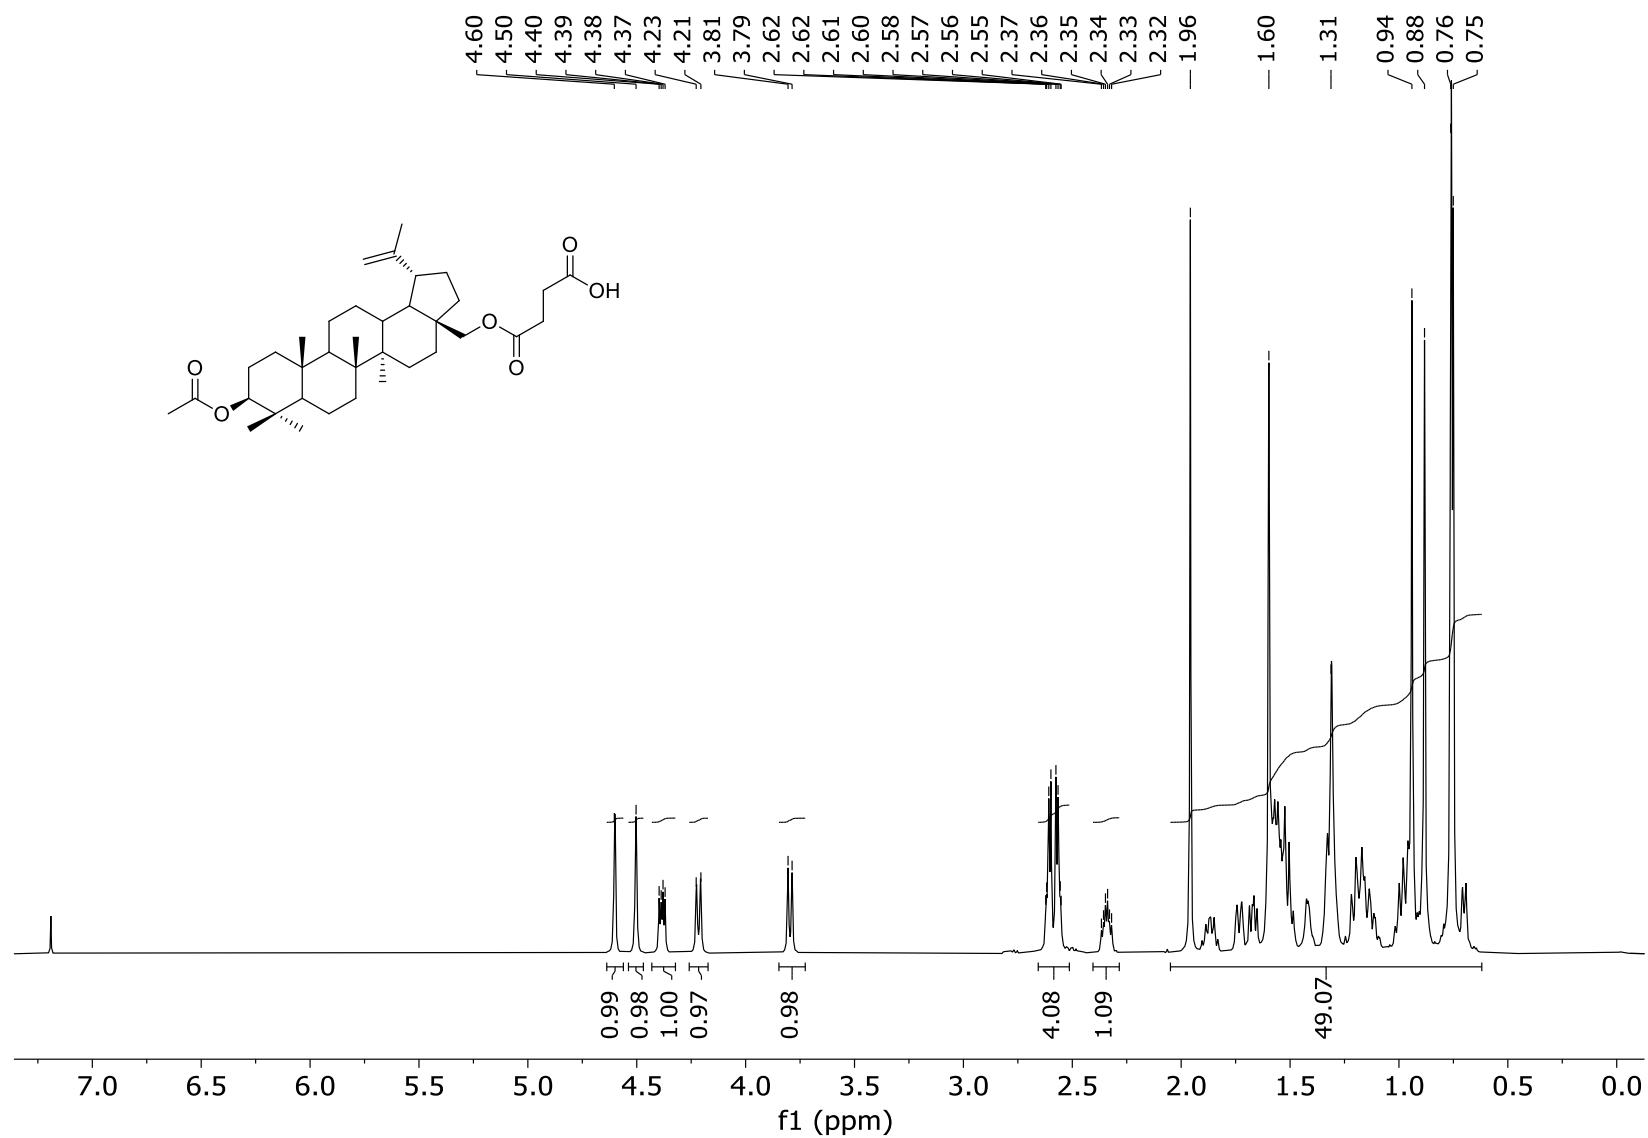

<sup>1</sup>H NMR spectrum of 3-O-acetyl-28-O-(3'-carboxypropanoyl)betulin (**4a**); 600 MHz/CDCl<sub>3</sub>/TMS; δ (ppm).

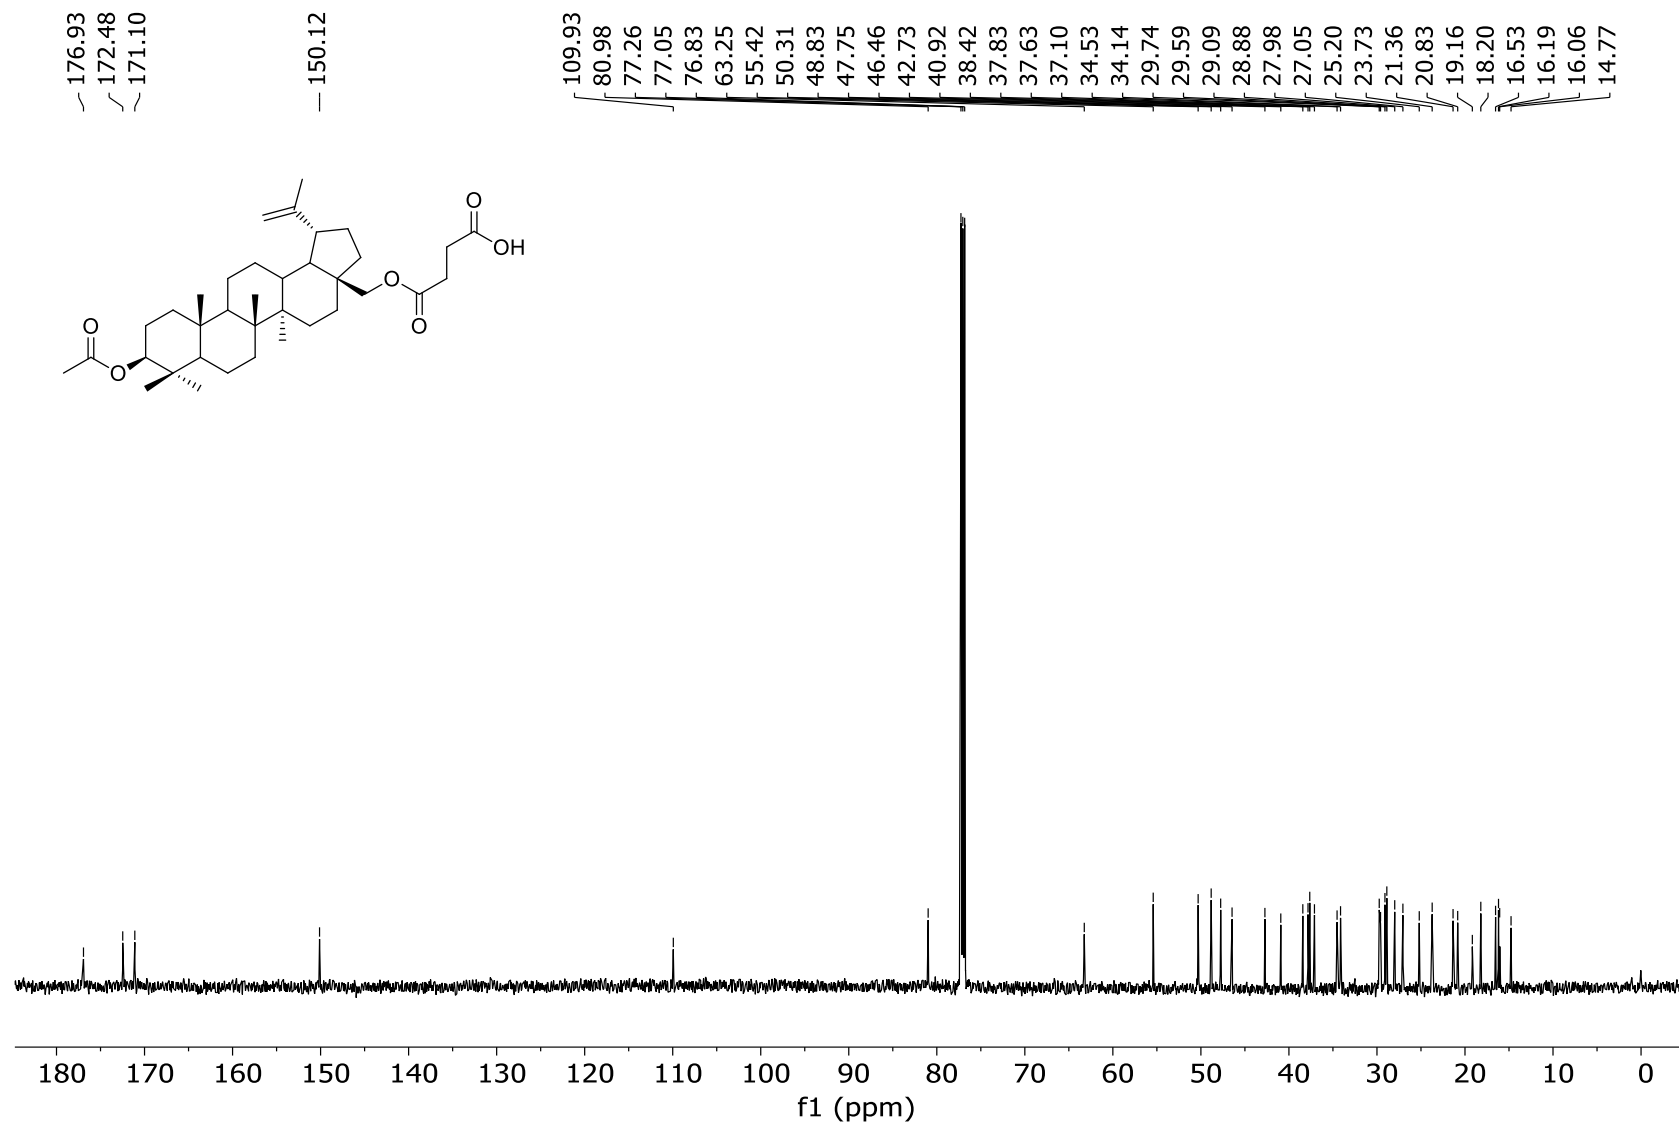

<sup>13</sup>C NMR spectrum of 3-O-acetyl-28- O-(3'-carboxypropanoyl)betulin (**4a**); 150 MHz/CDCl<sub>3</sub>/TMS; δ (ppm).

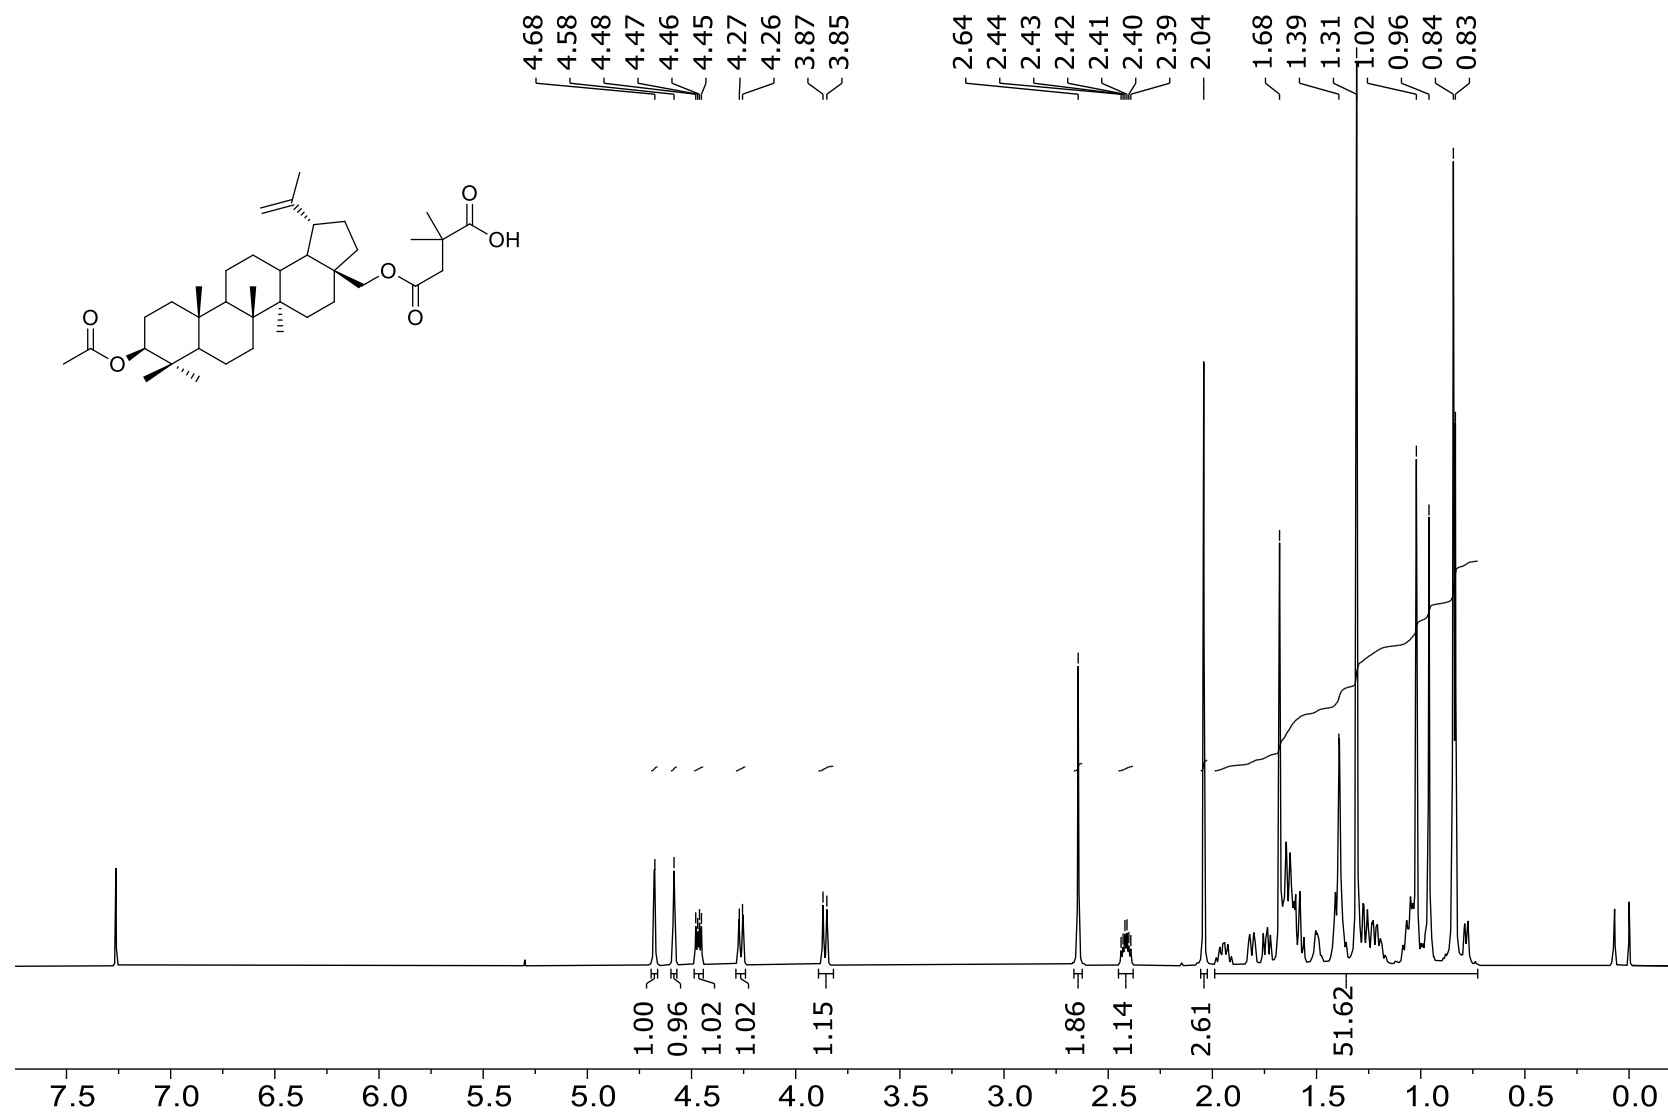

<sup>1</sup>H NMR spectrum of 3-O-acetyl-28-O-(3',3'-dimethyl-3'-carboxypropanoyl)betulin (**4b**); 600 MHz/CDCl<sub>3</sub>/TMS; δ (ppm).

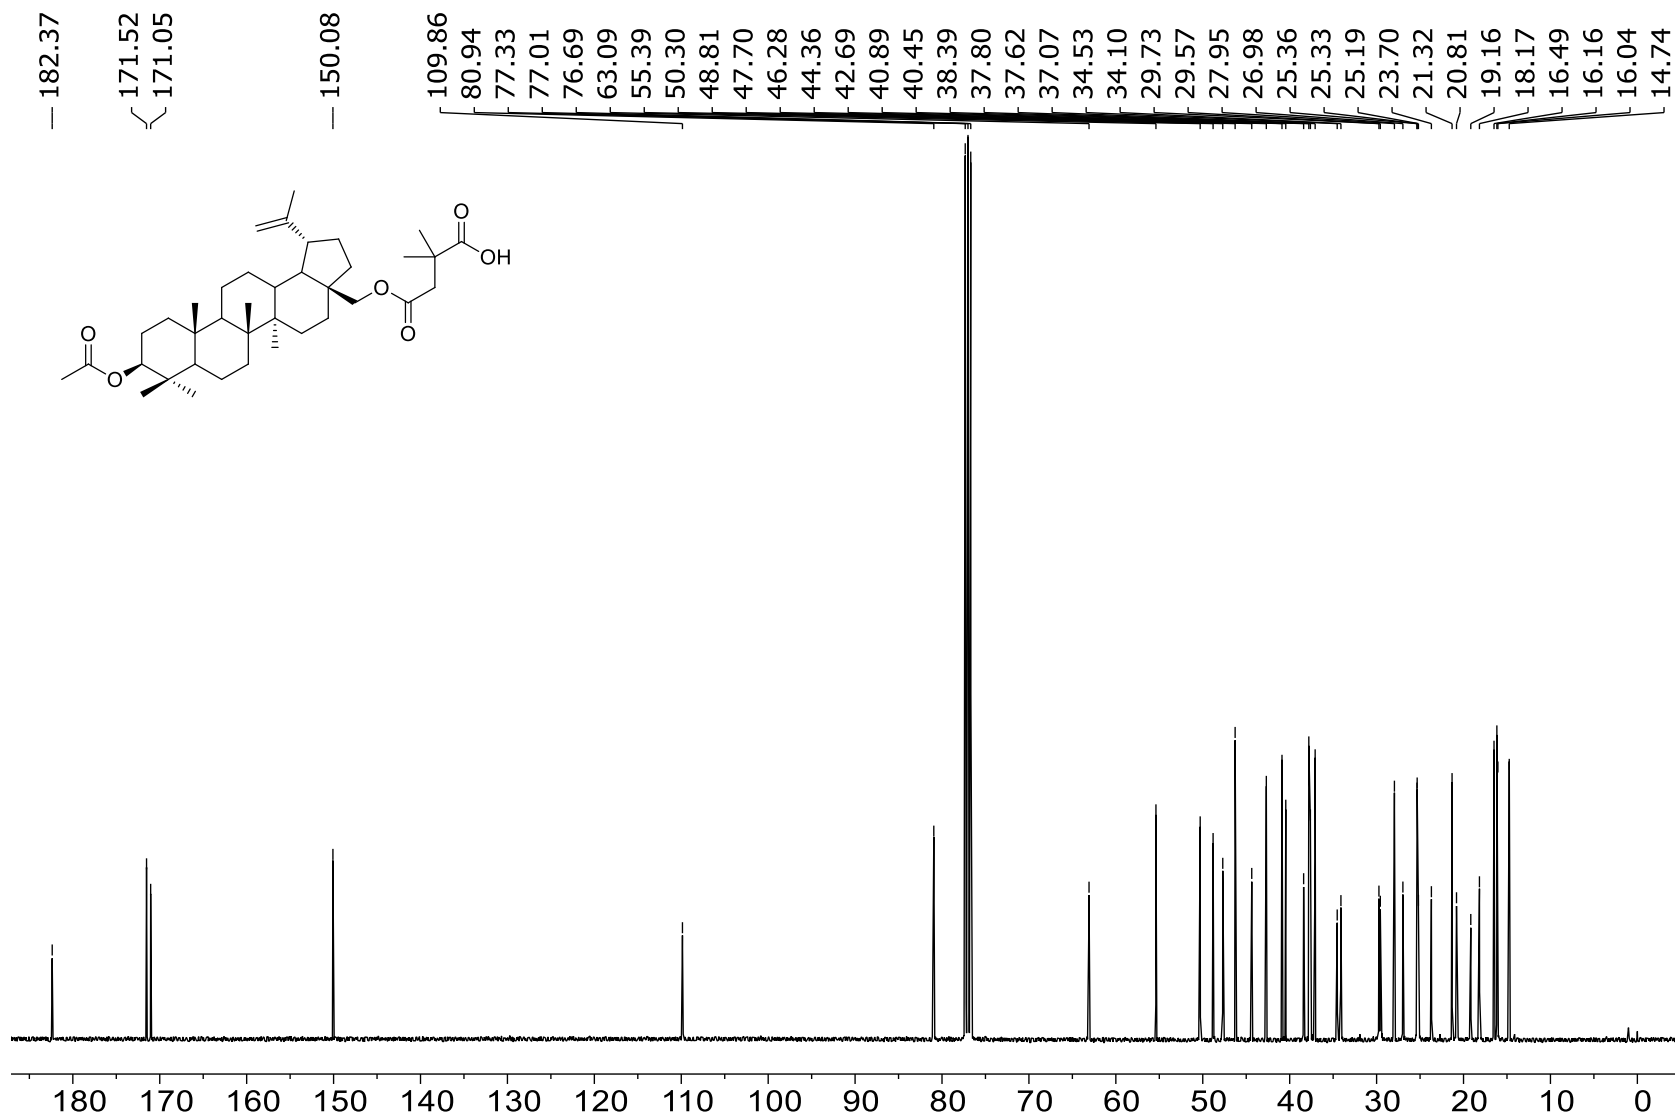

<sup>13</sup>C NMR spectrum of 3- *O*-acetyl-28- *O*-(3',3'-dimethyl-3'-carboxypropanoyl)betulin (**4b**); 150 MHz/CDCl<sub>3</sub>/TMS; δ (ppm).

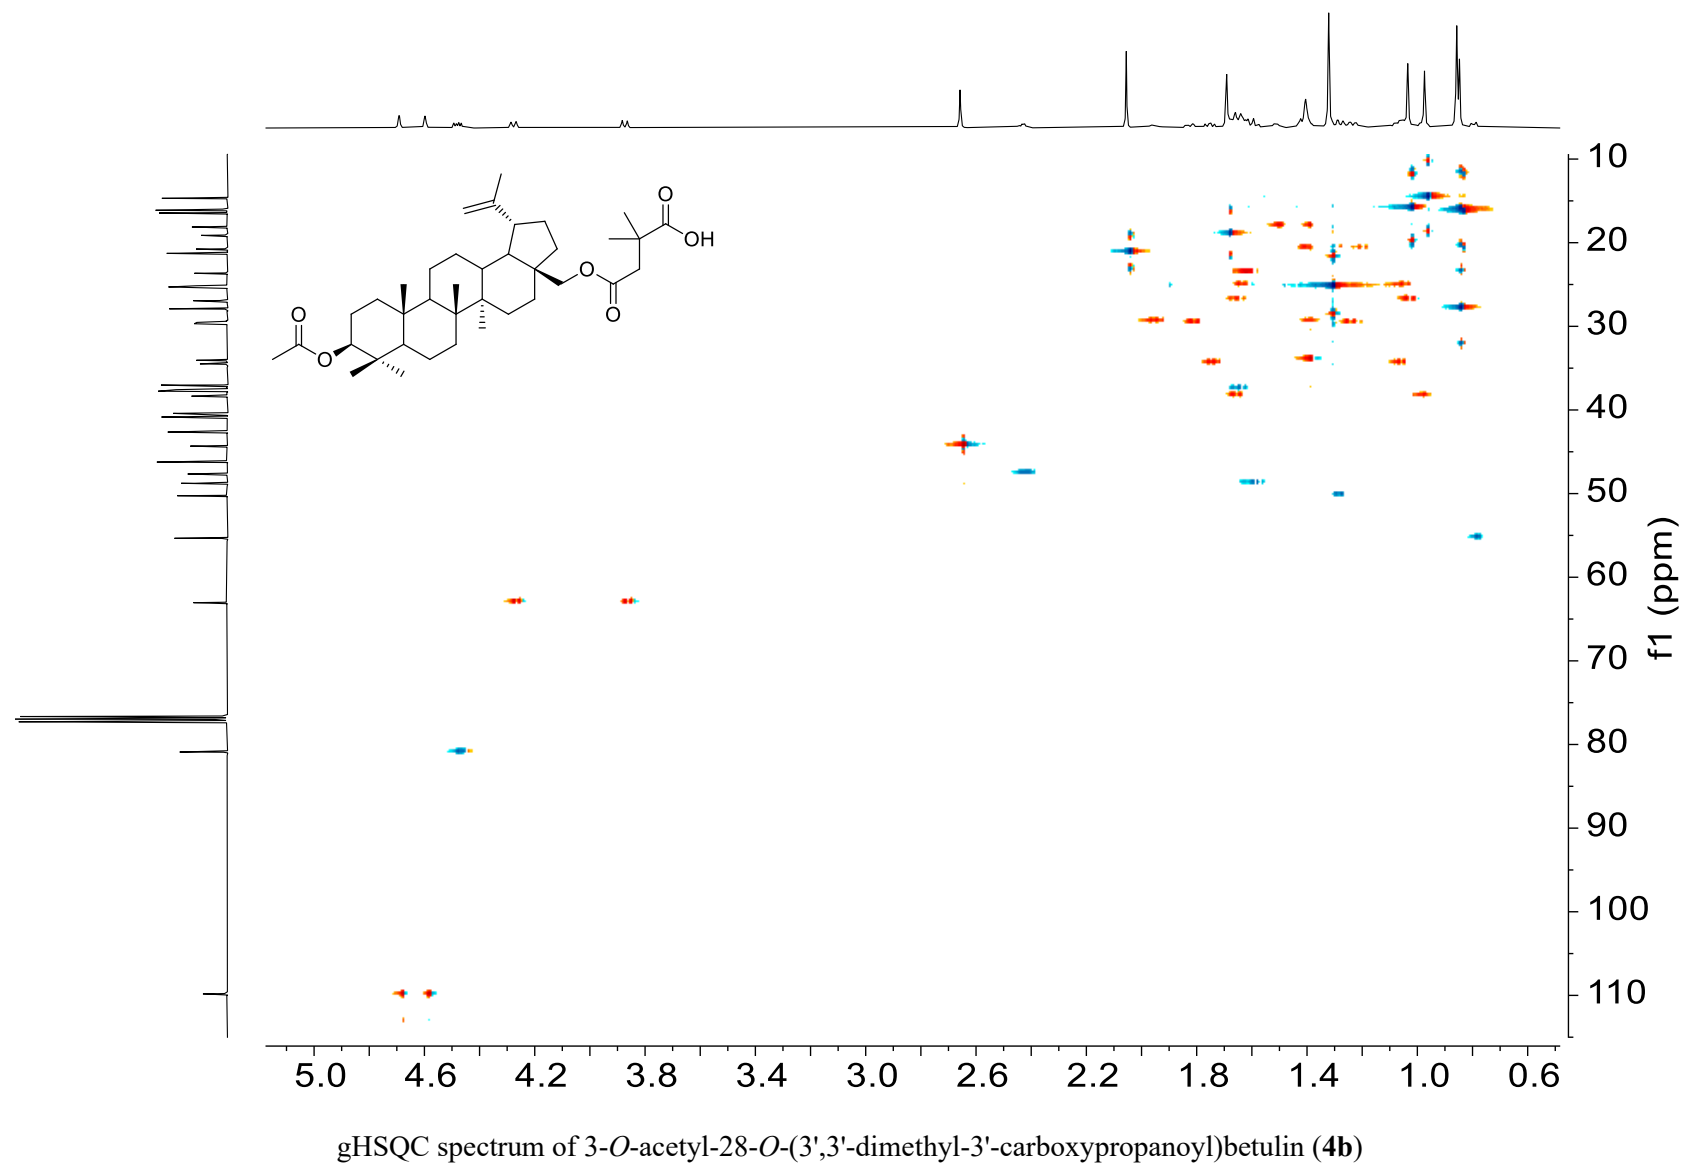



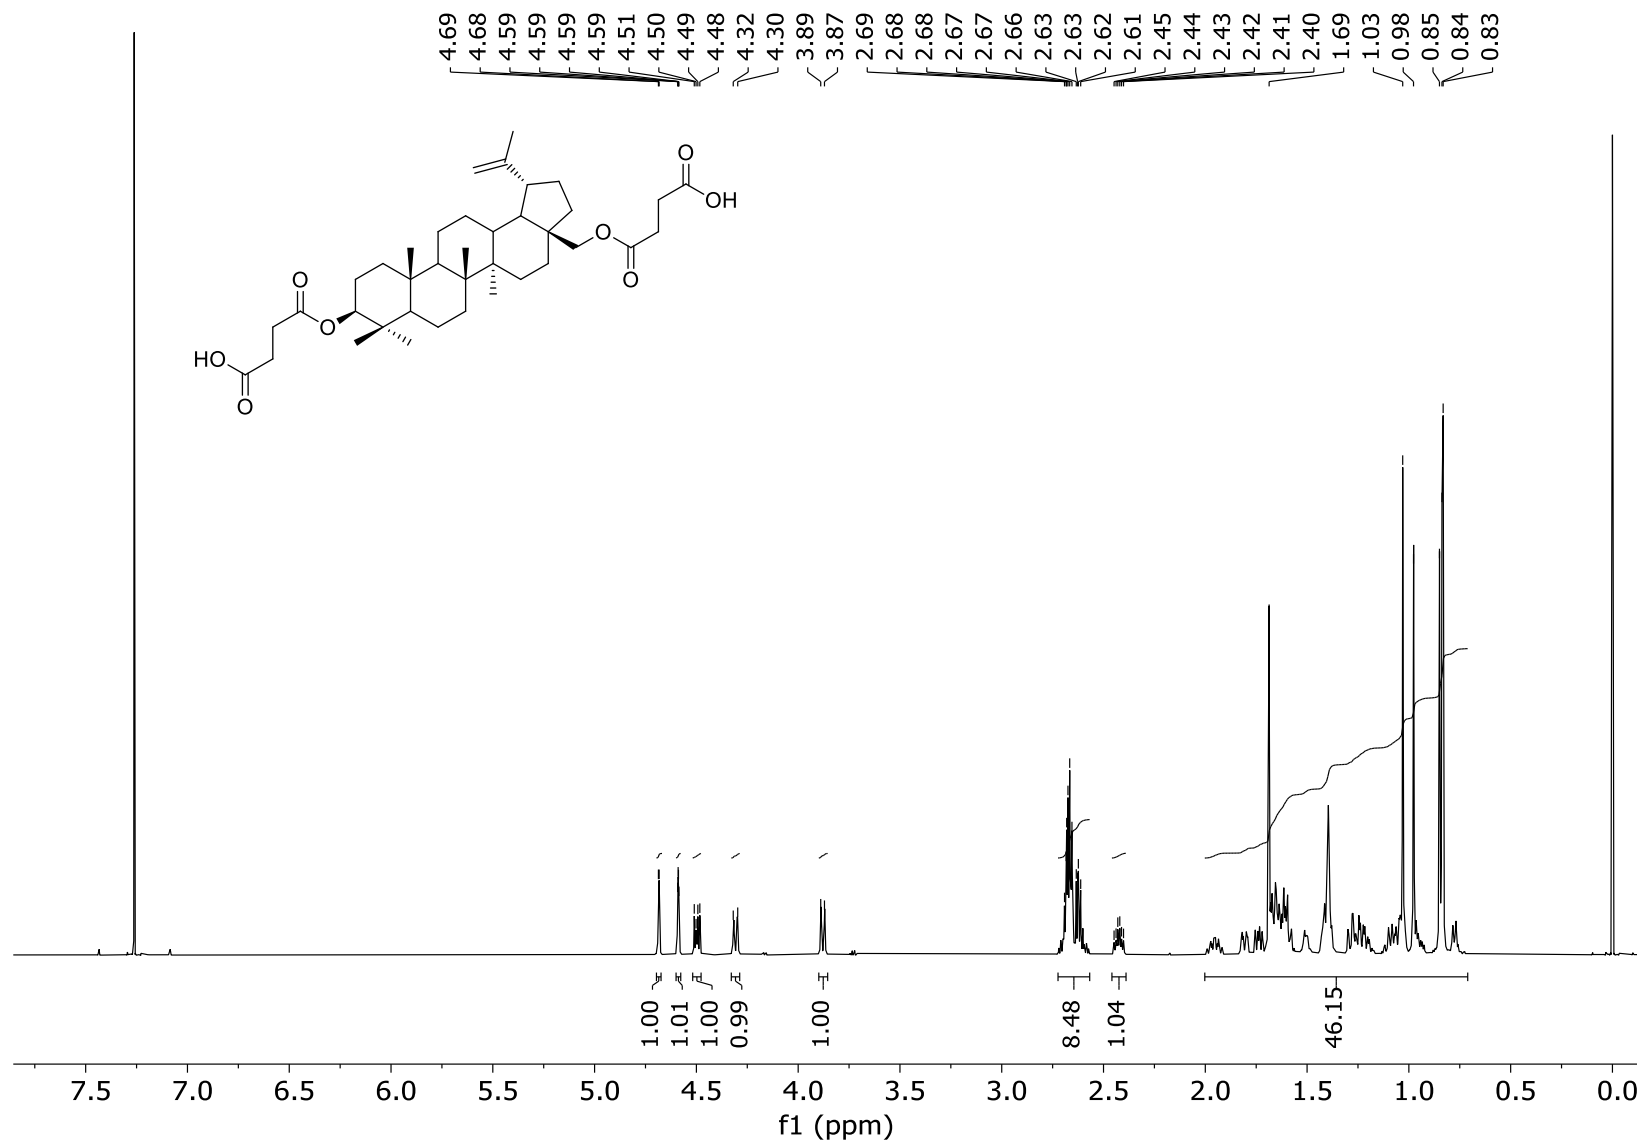

<sup>1</sup>H NMR spectrum of 3,28-O,O'-bis(3'-carboxypropanoyl)betulin (5); 600 MHz/CDCl<sub>3</sub>/TMS; δ (ppm).

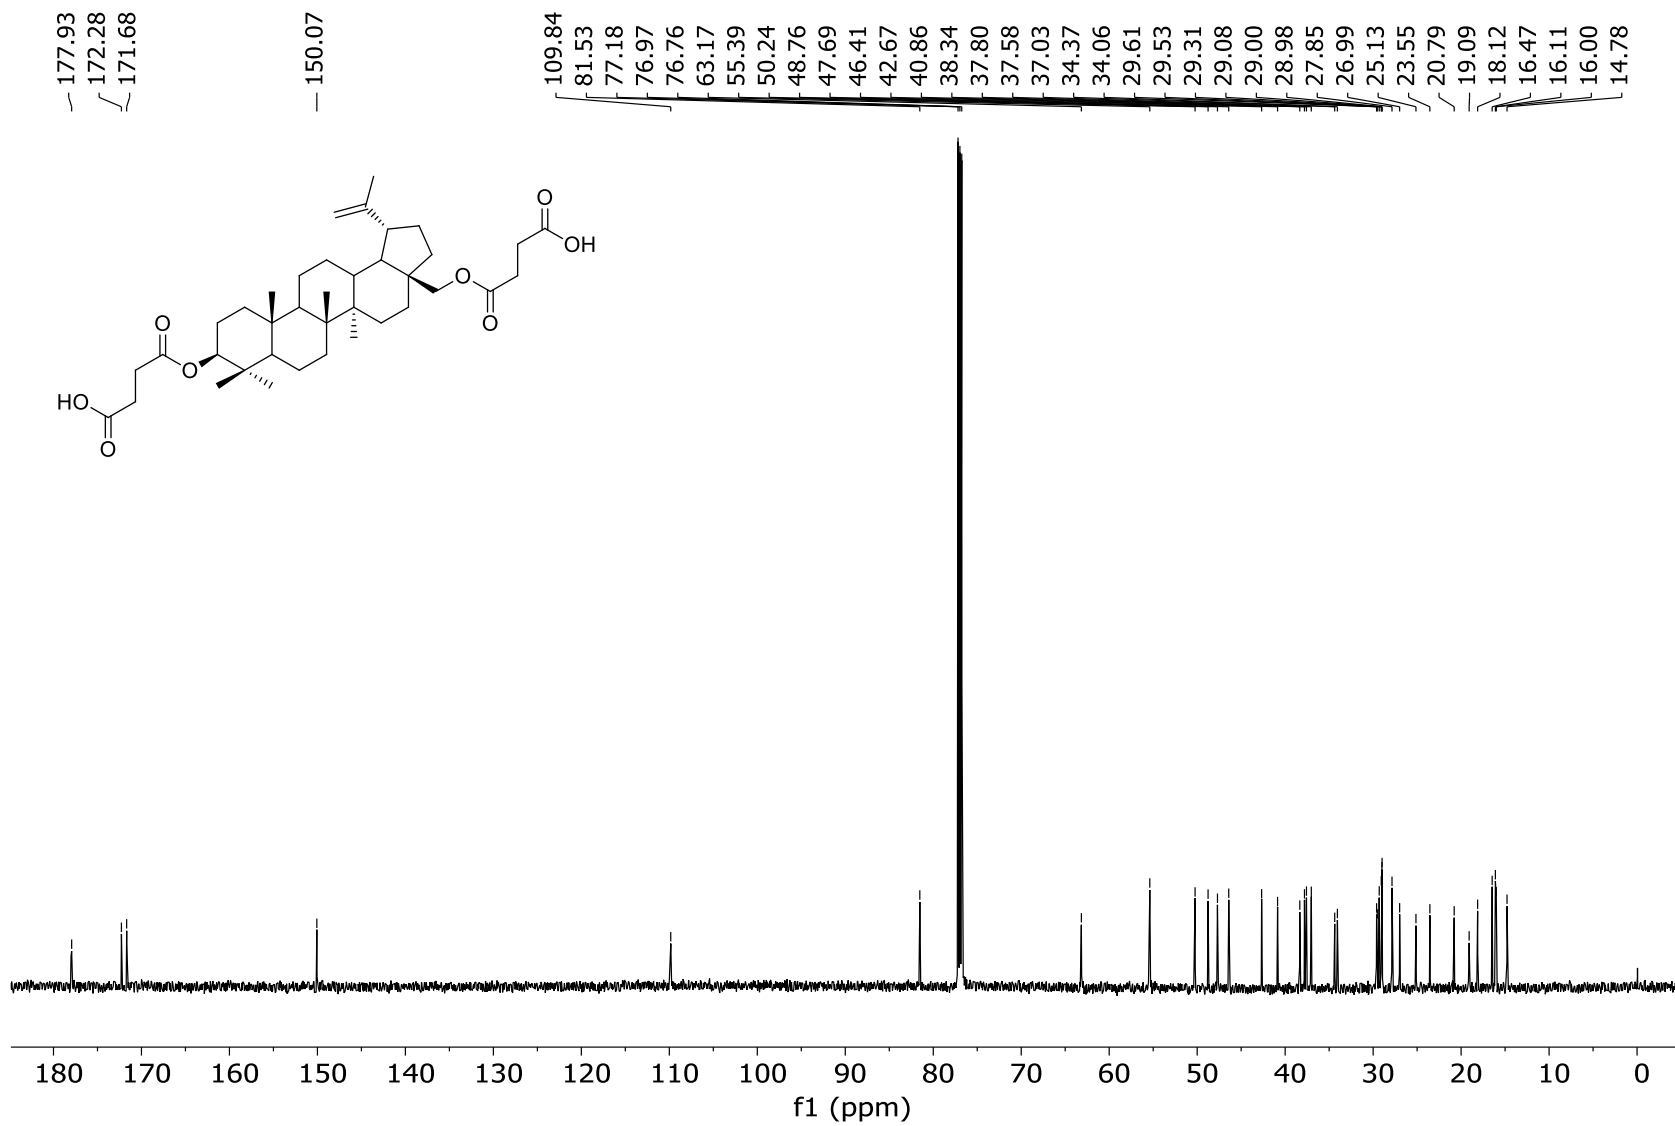

$^{13}\text{C}$  NMR spectrum of 3,28-*O,O'*-bis(3'-carboxypropanoyl)betulin (5); 150 MHz/ $\text{CDCl}_3$ /TMS;  $\delta$  (ppm).

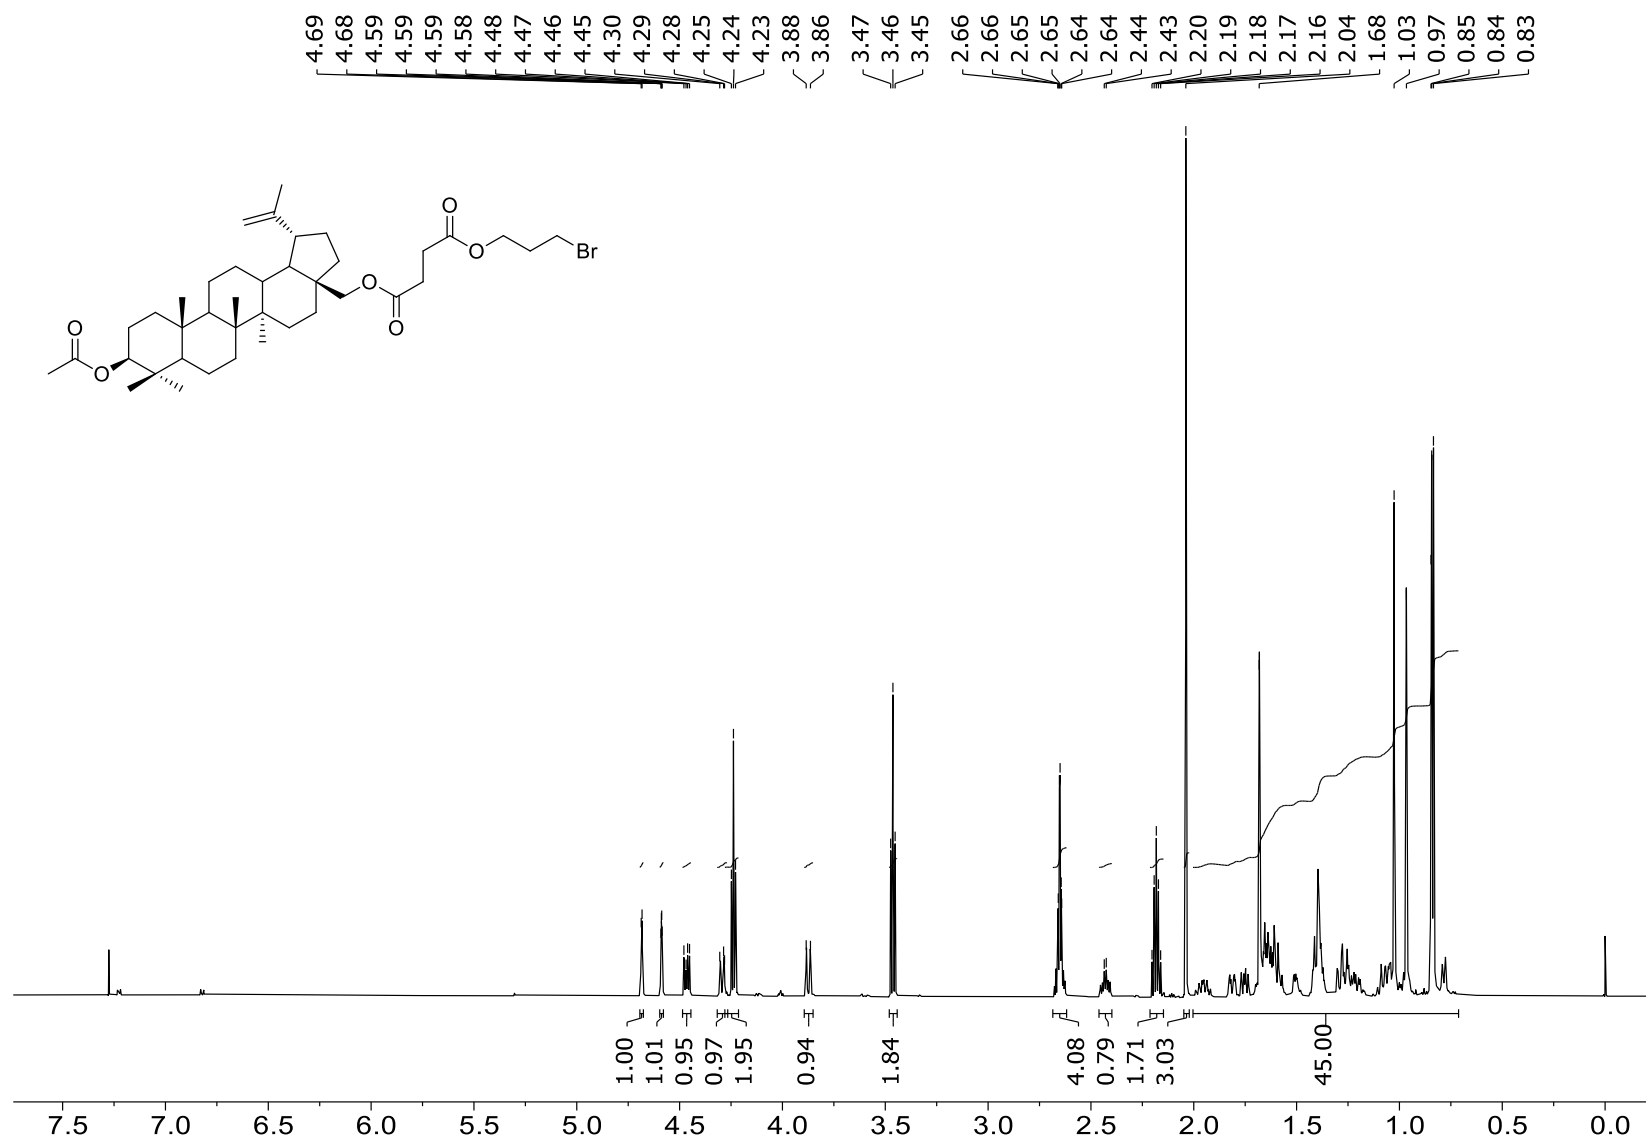

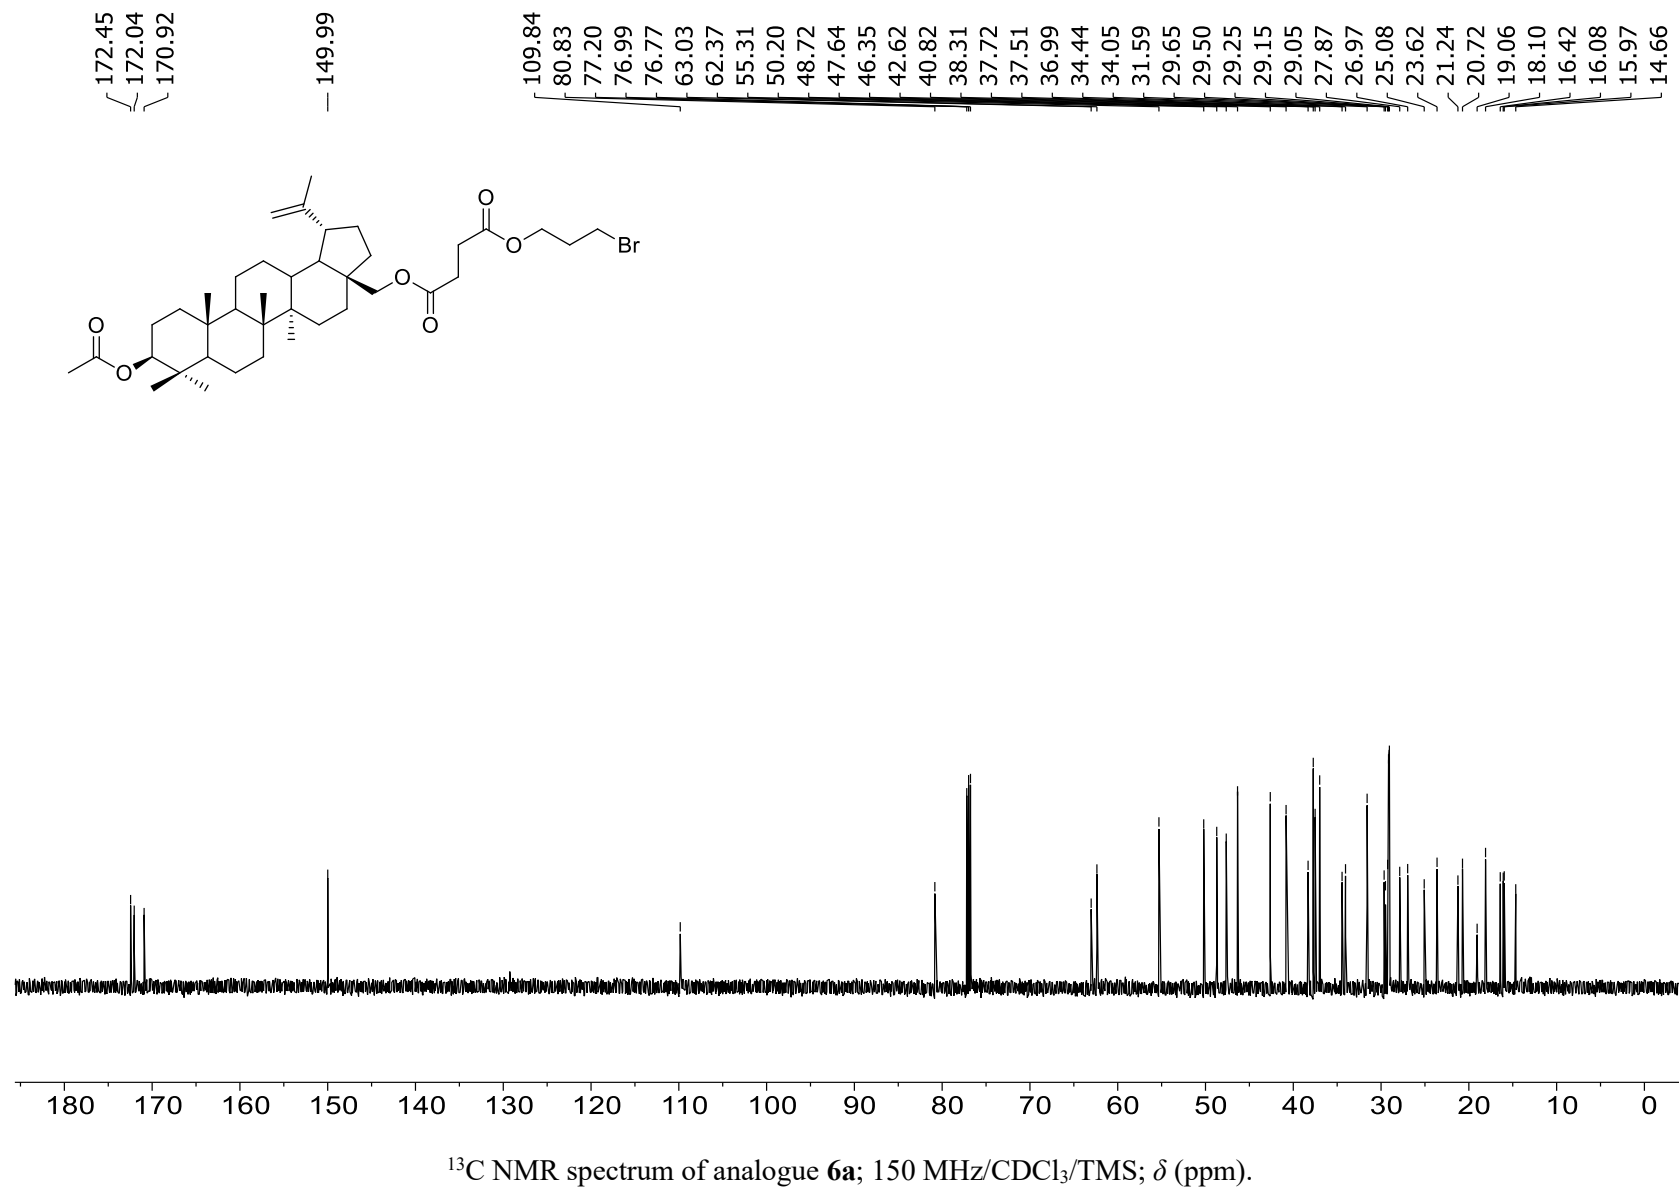

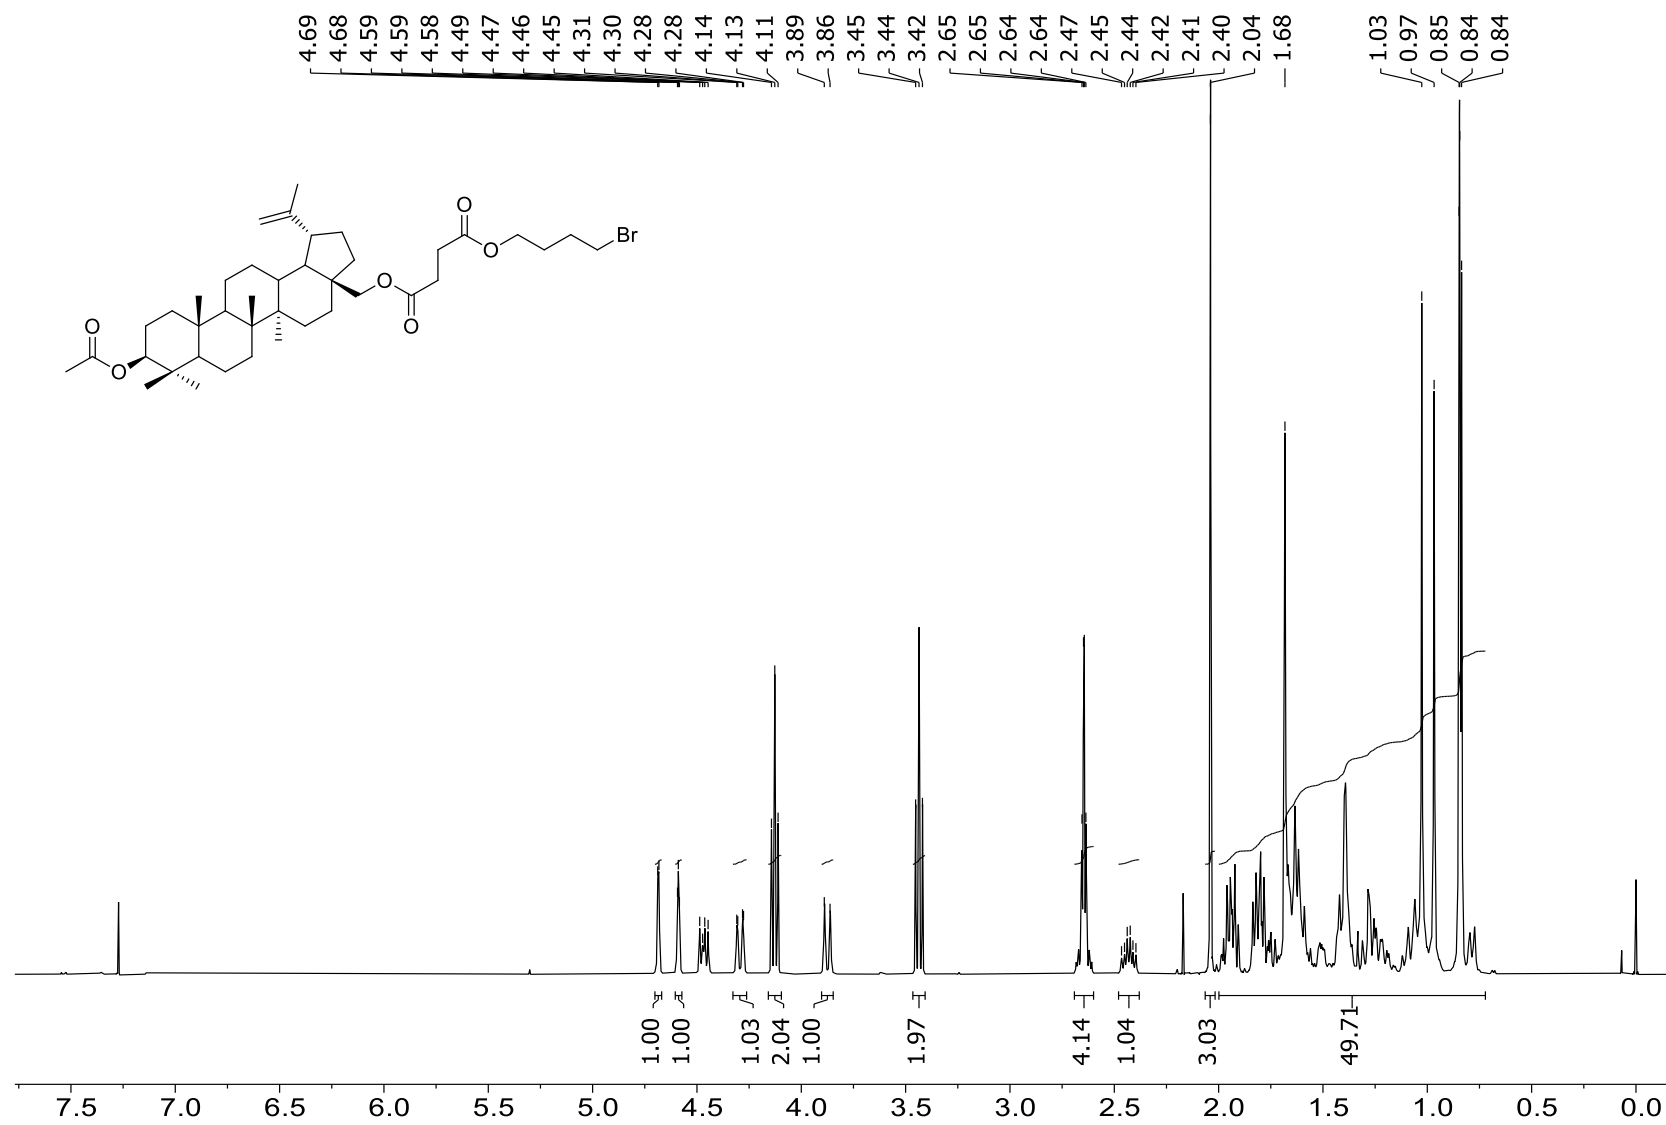

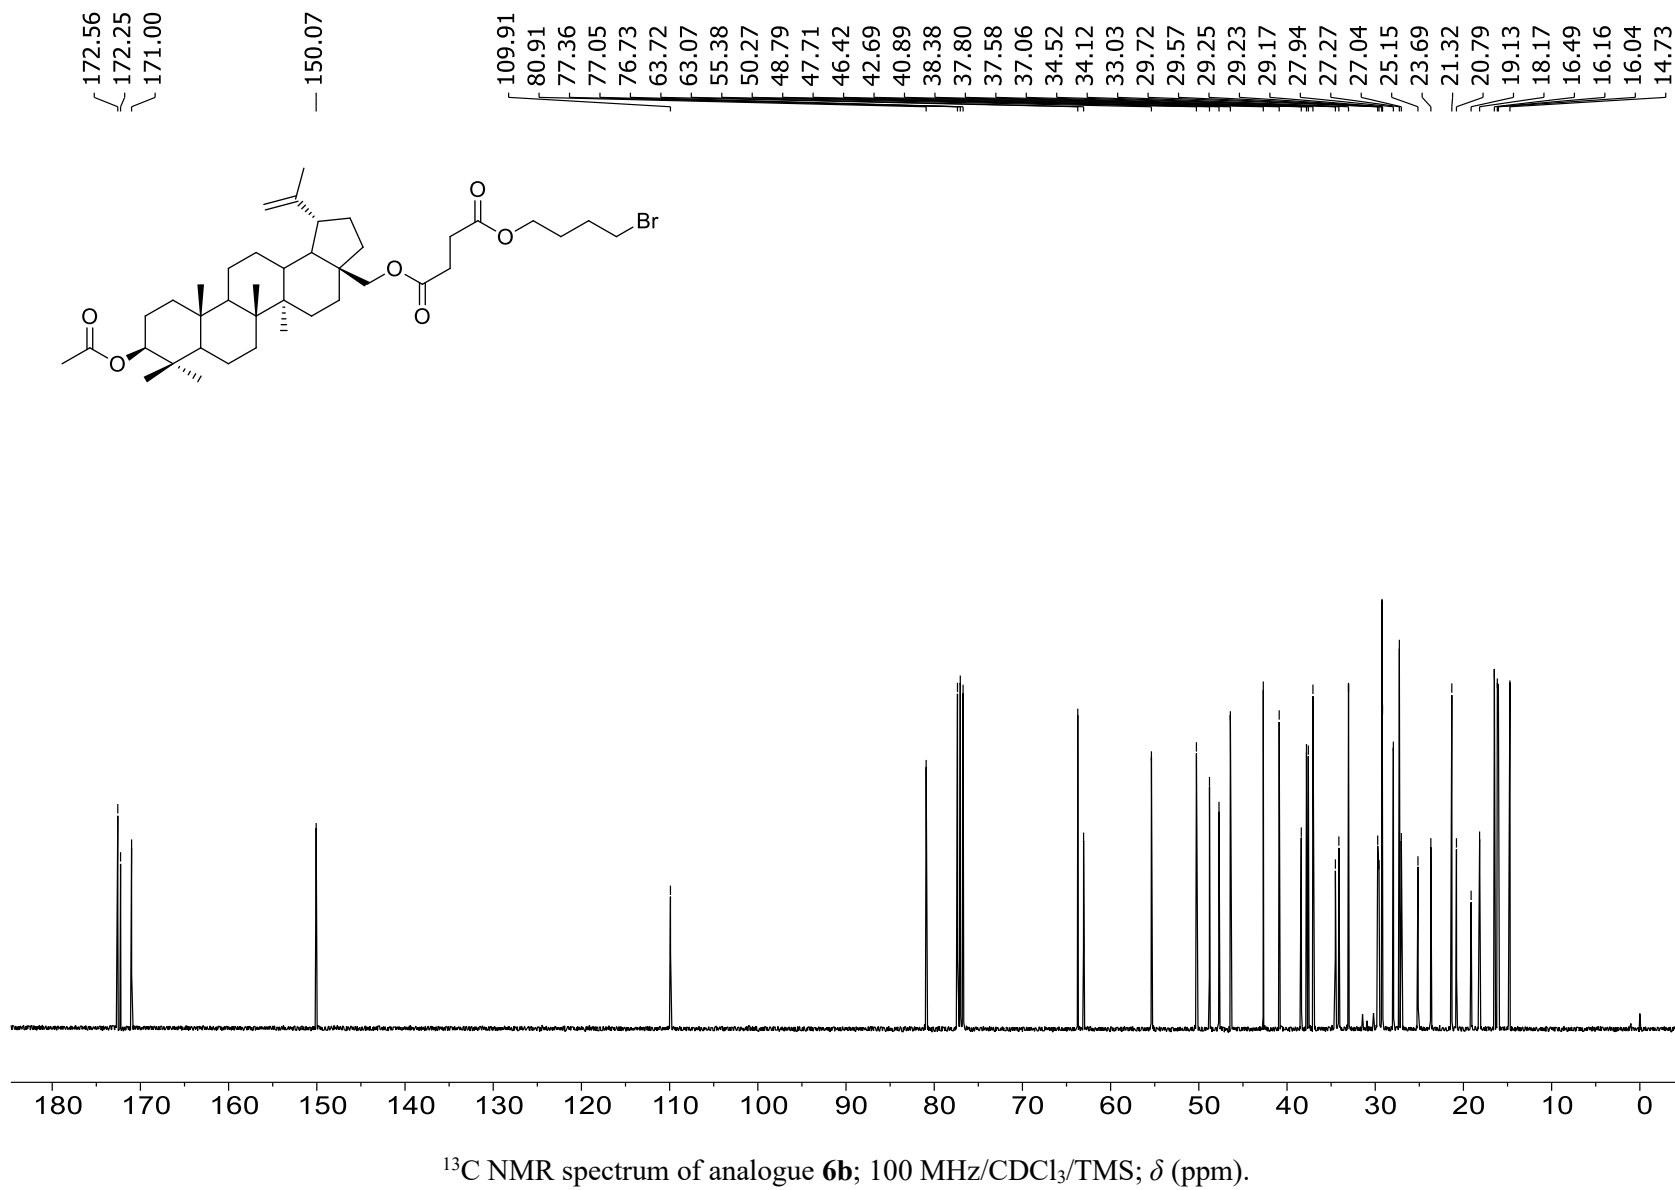

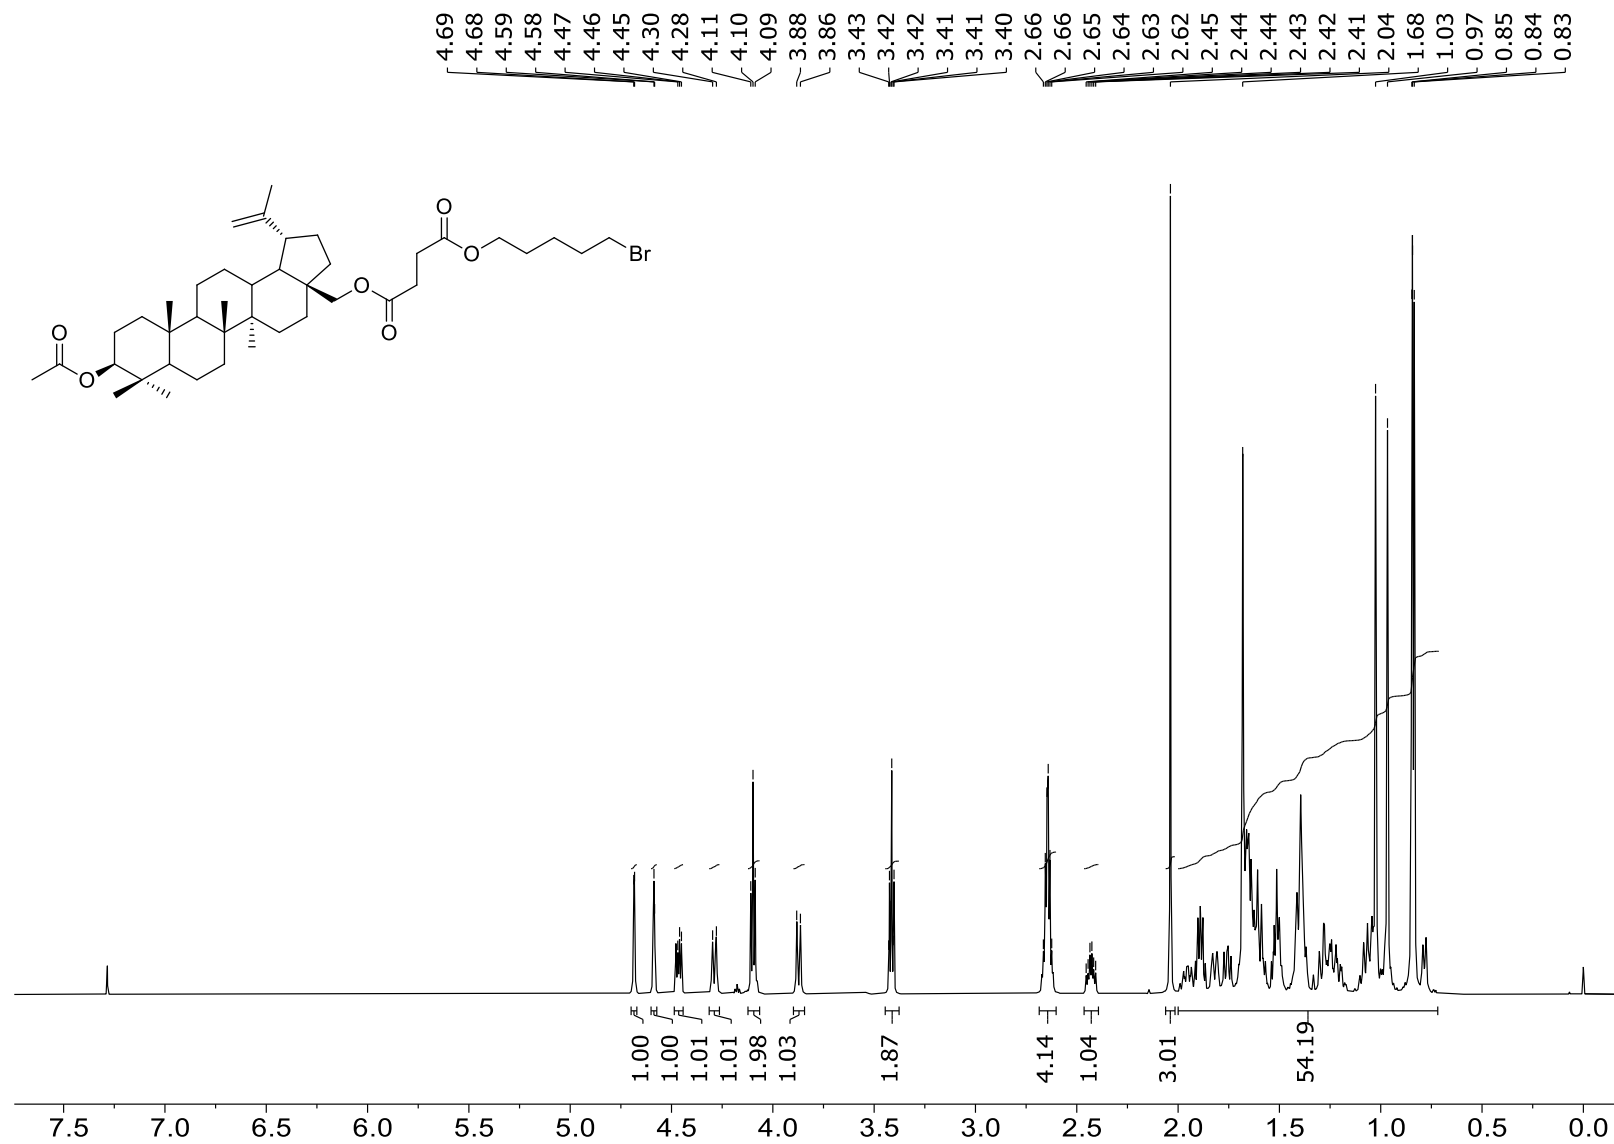

<sup>1</sup>H NMR spectrum of analogue **6c**; 600 MHz/CDCl<sub>3</sub>/TMS; δ (ppm).

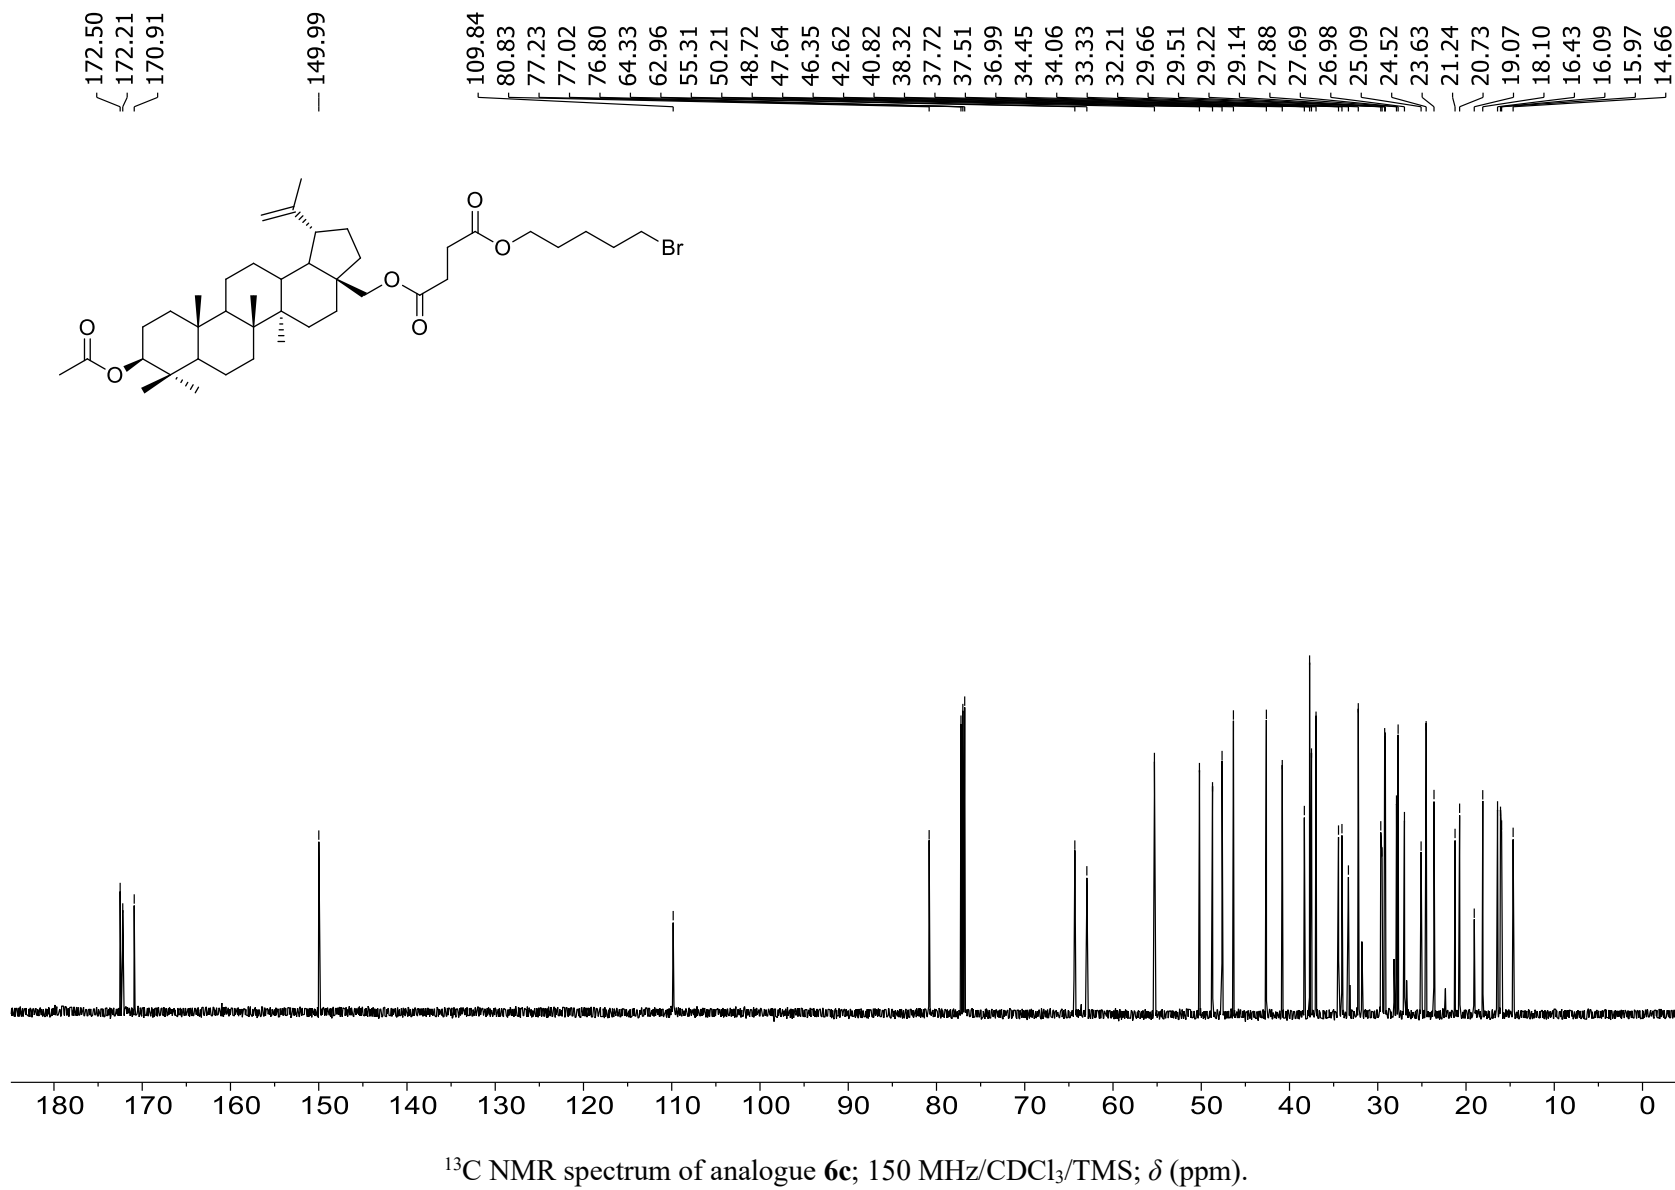



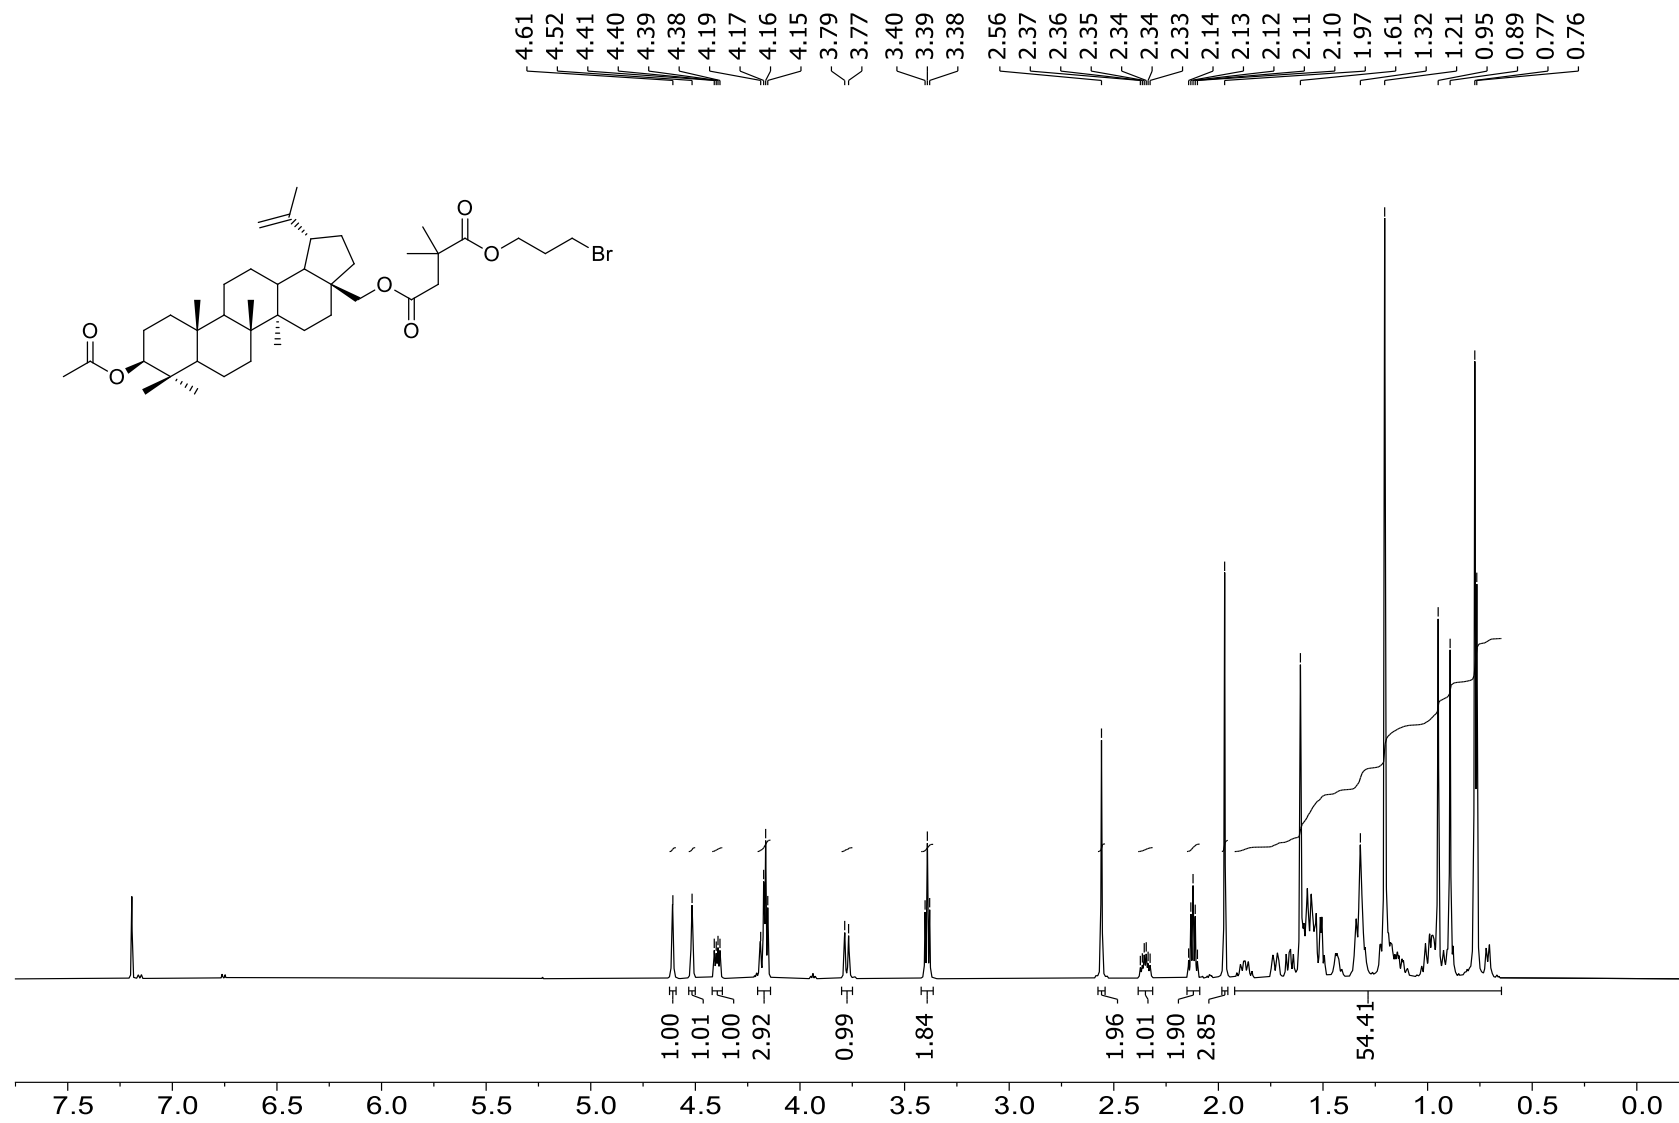

<sup>1</sup>H NMR spectrum of analogue **6d**; 400 MHz/CDCl<sub>3</sub>/TMS; δ (ppm).

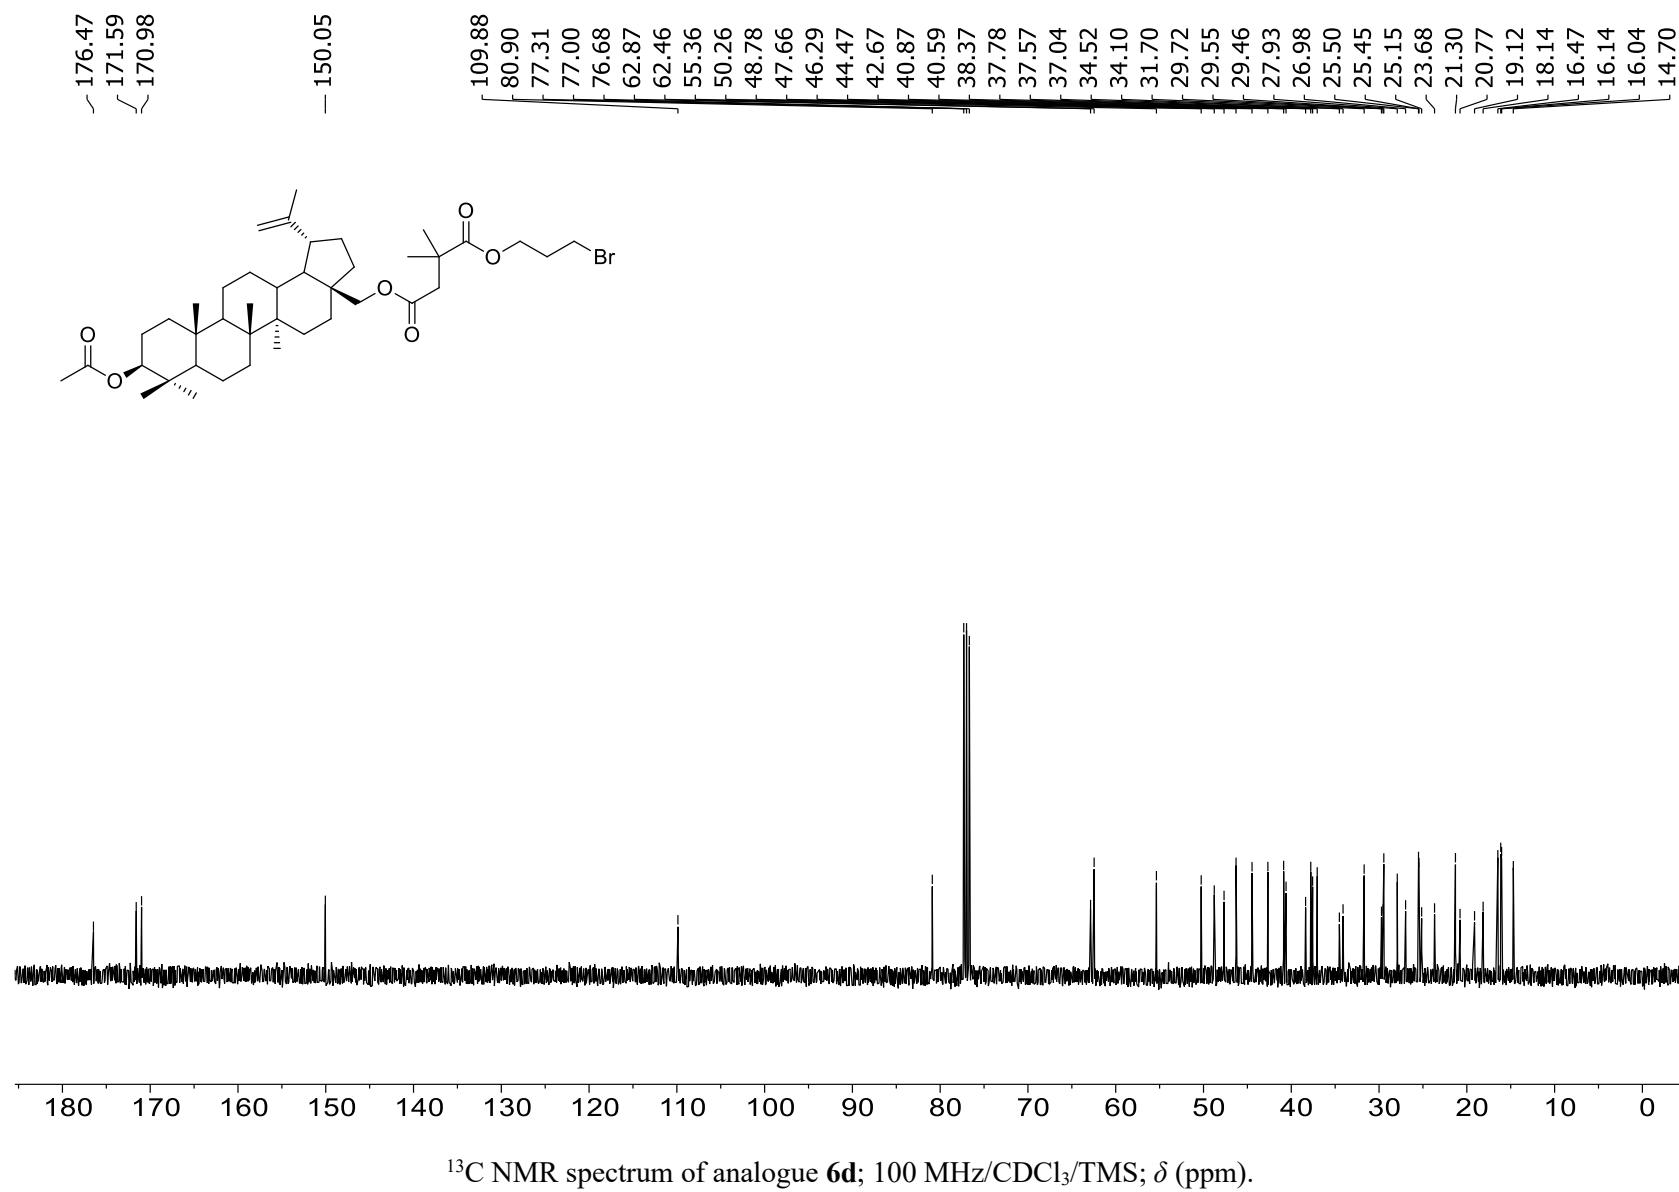

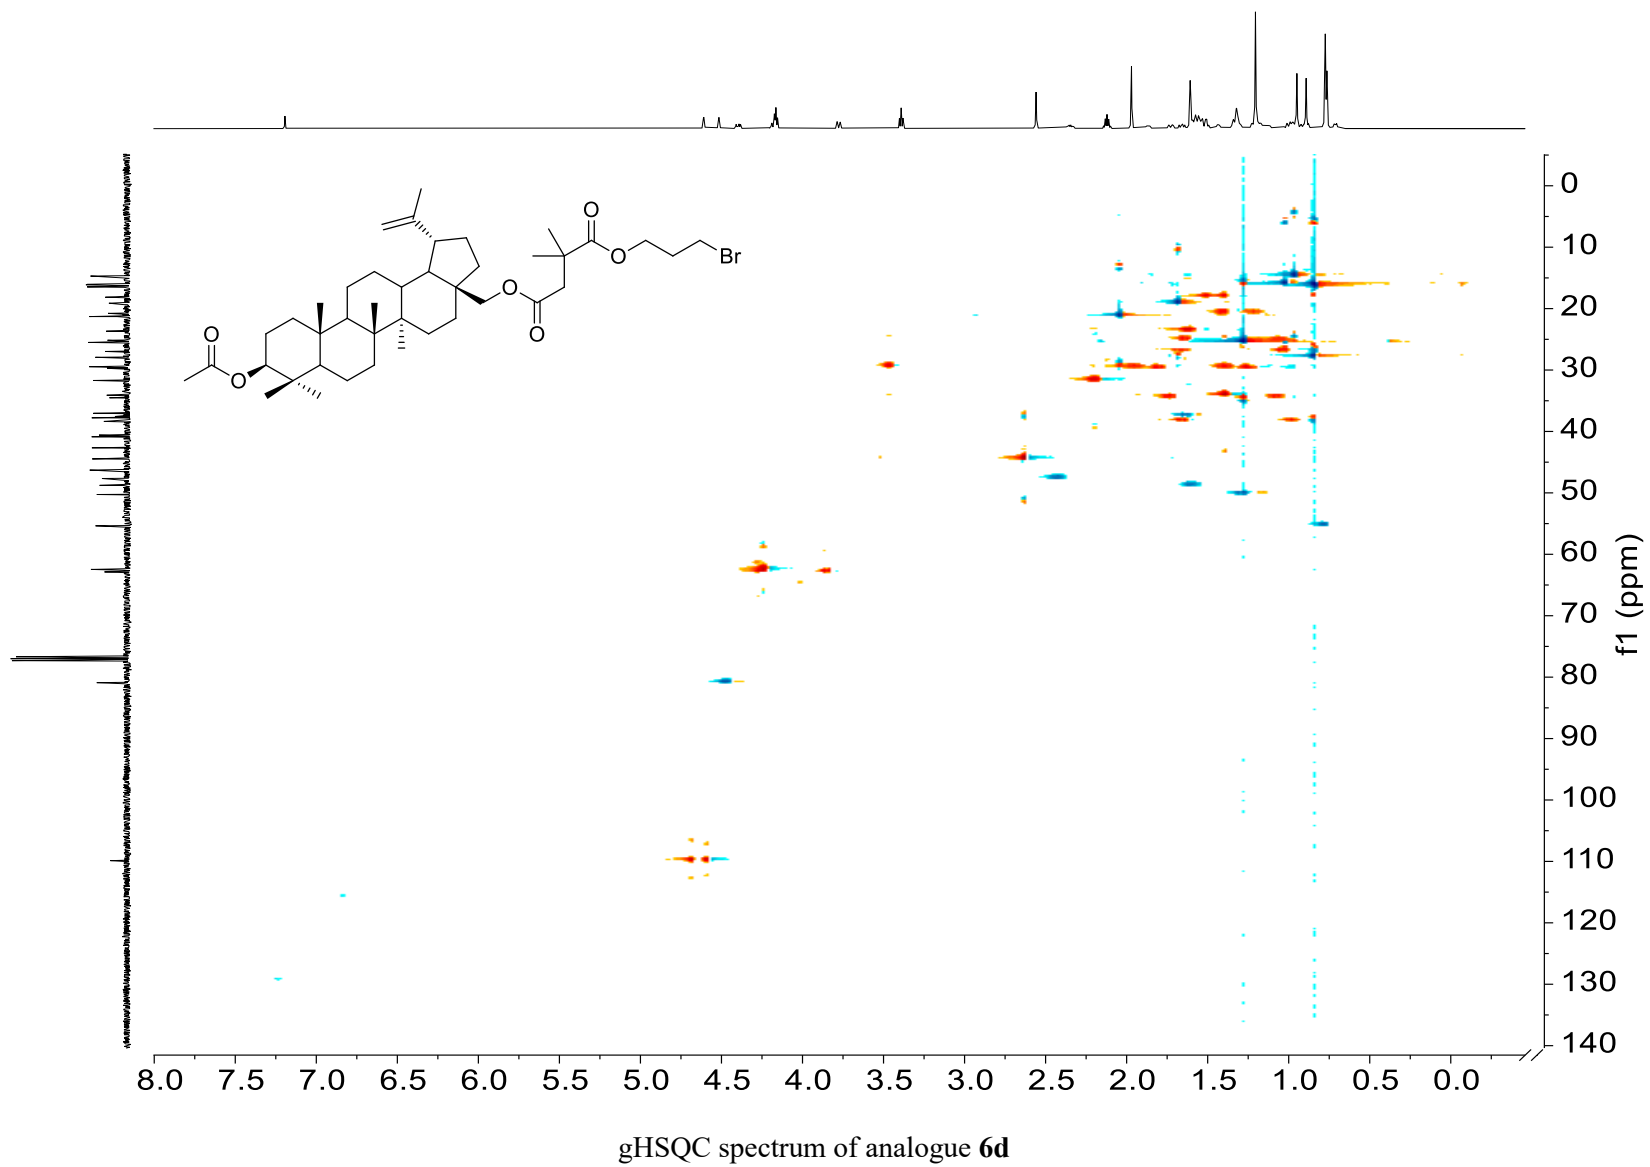

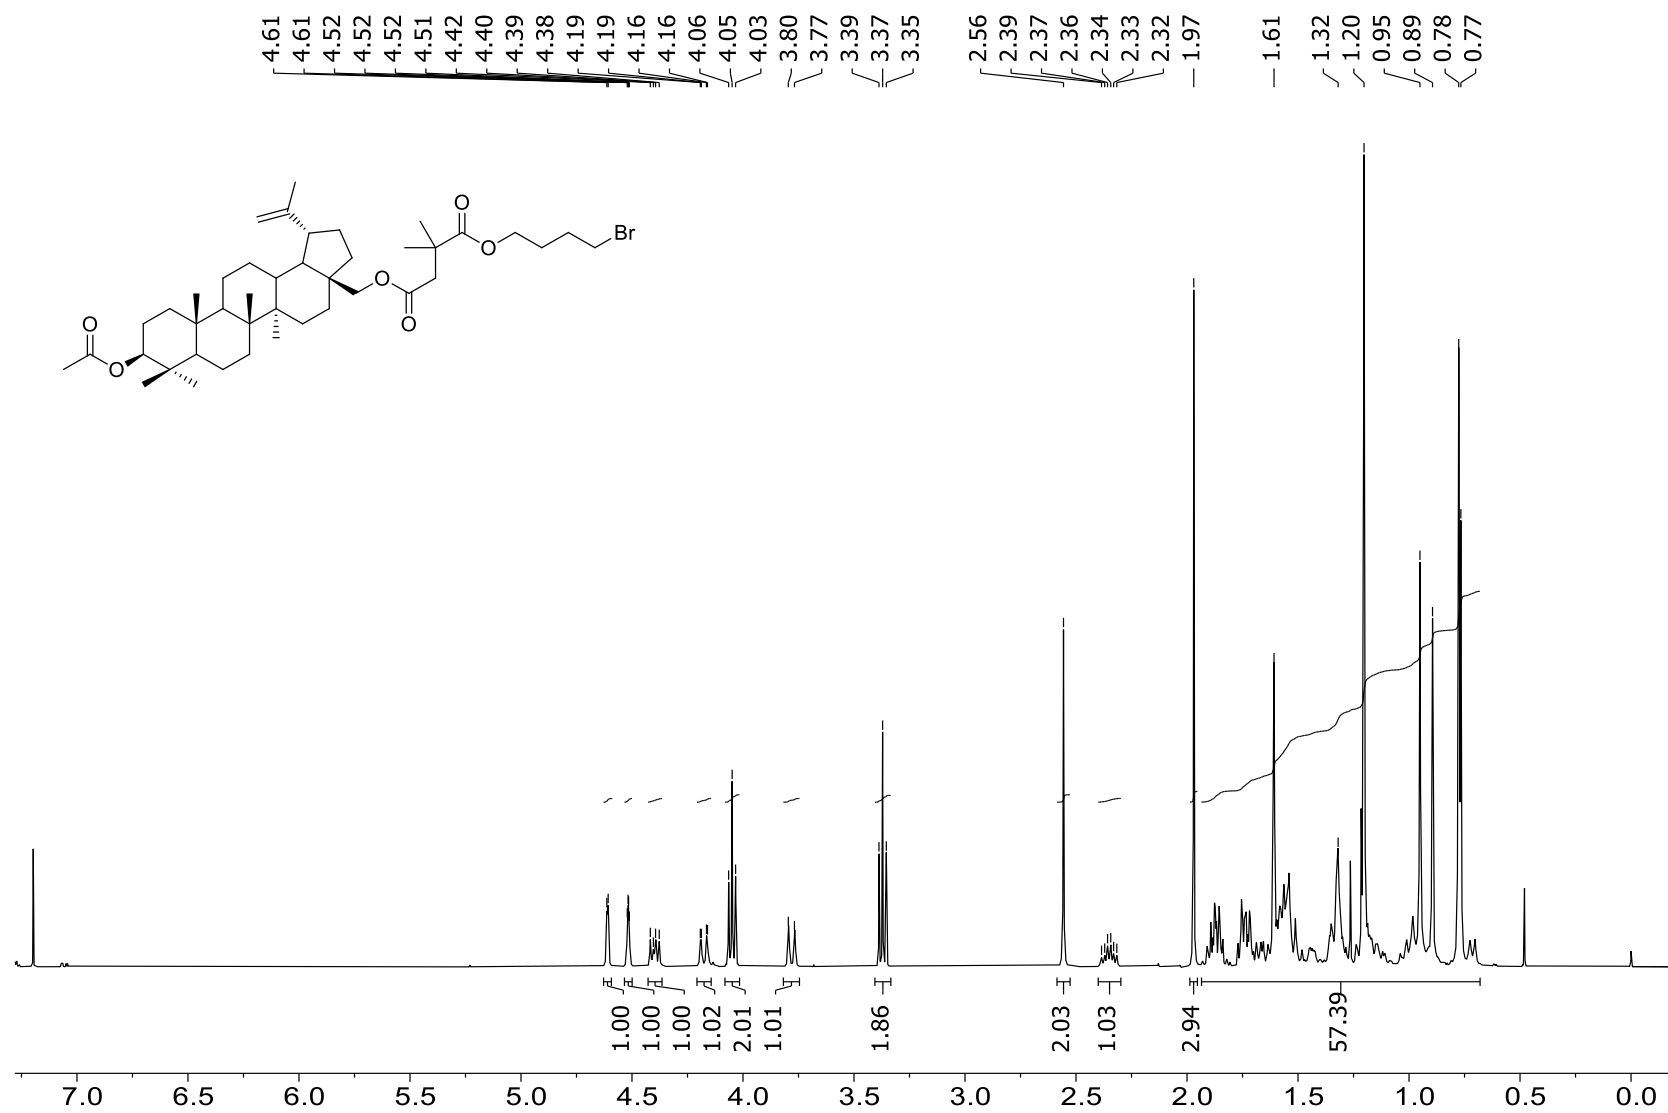

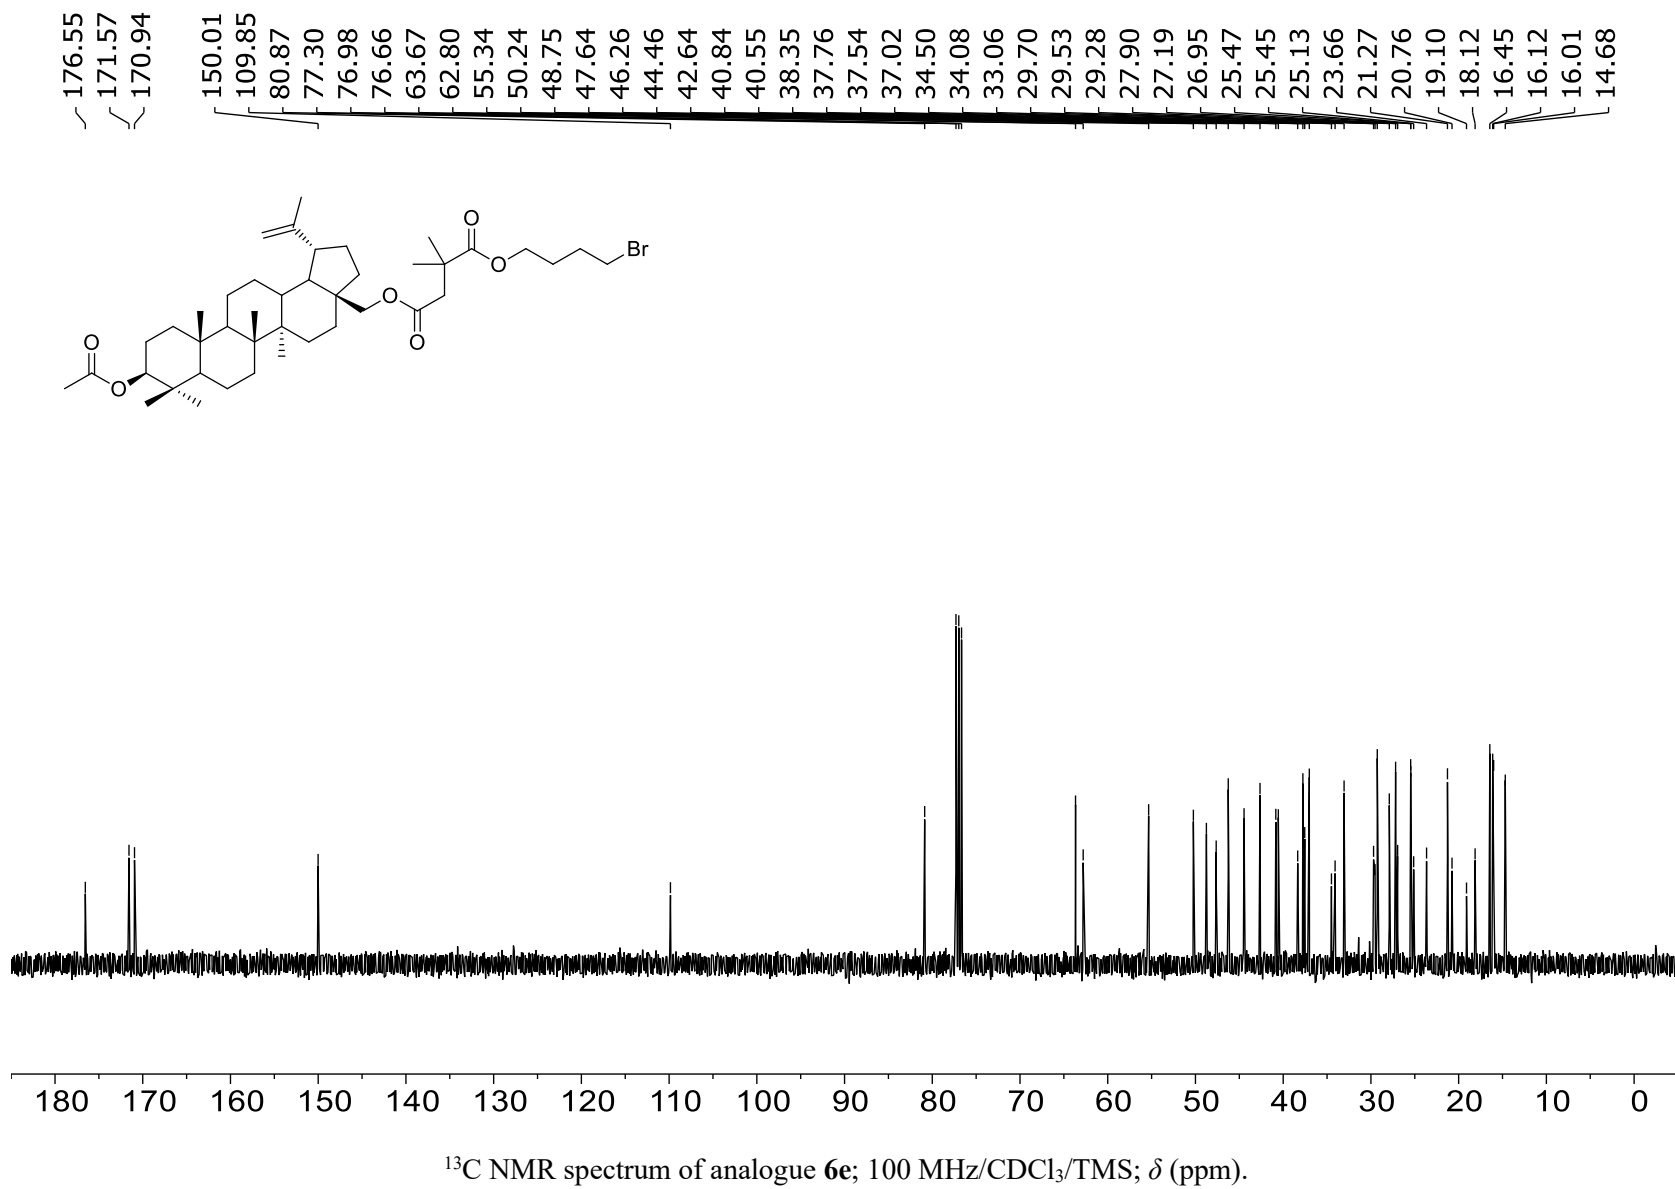

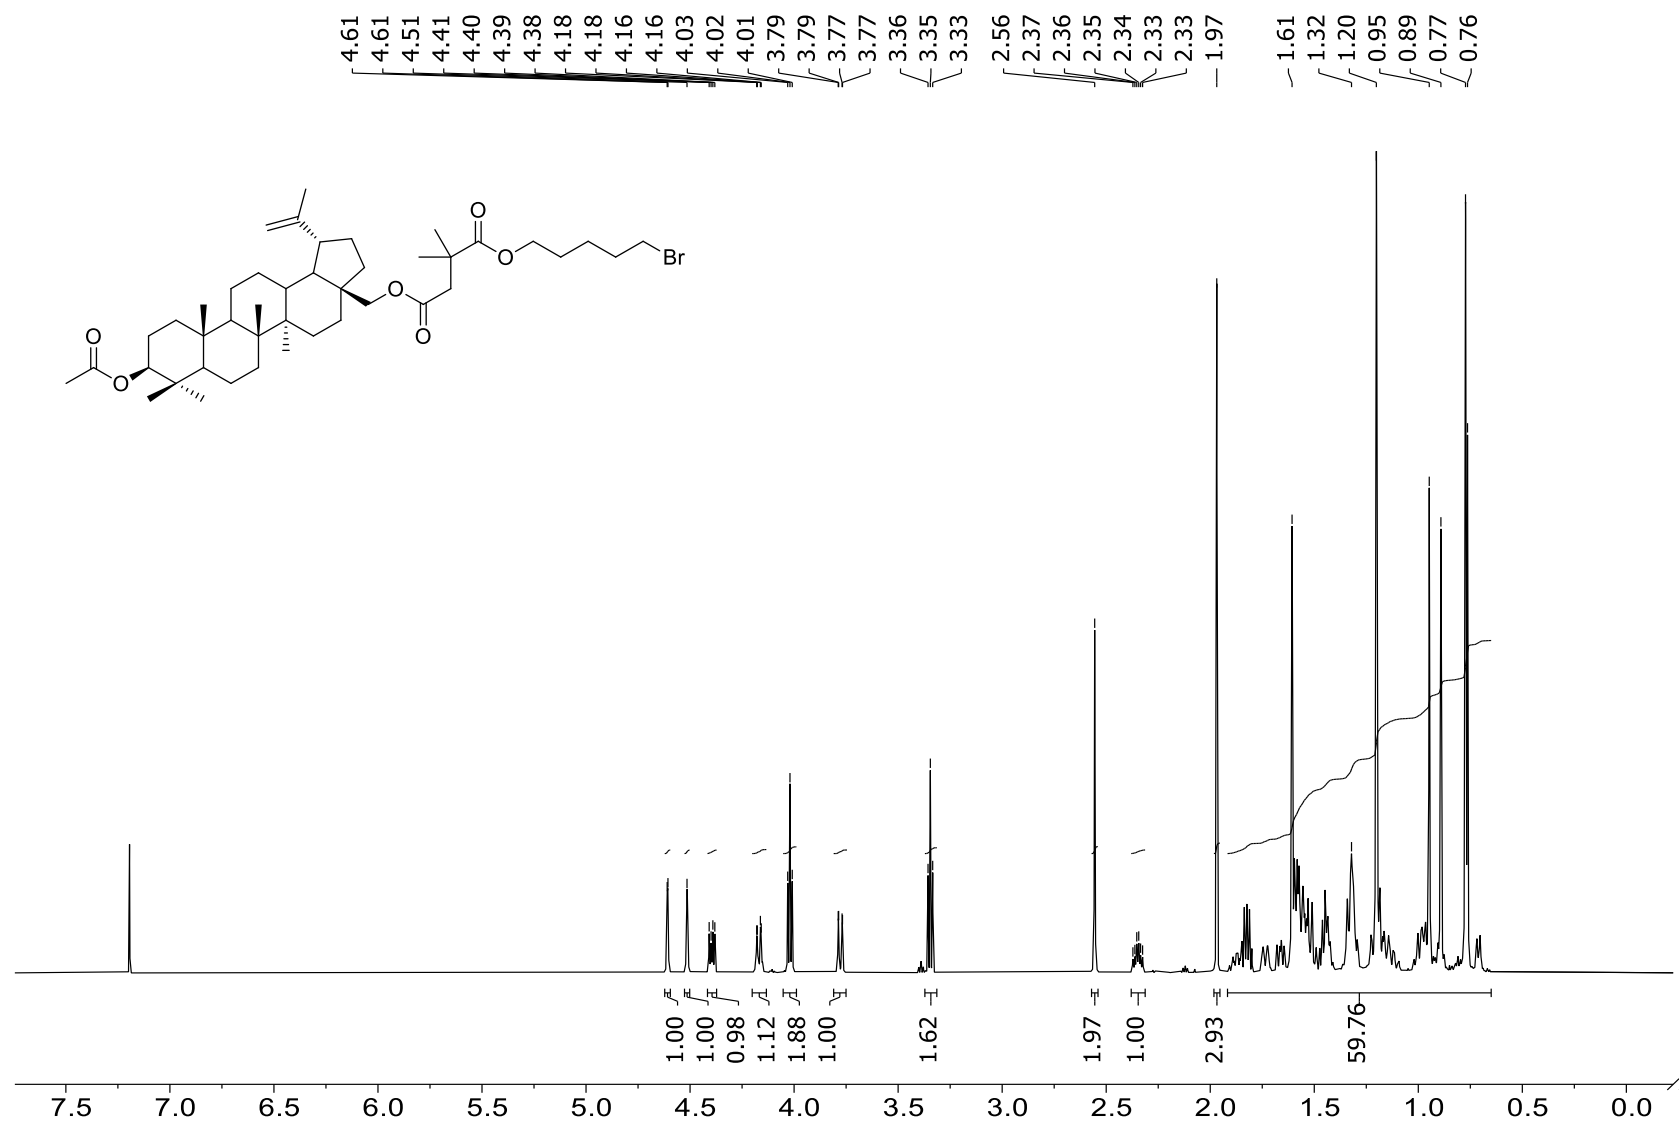

<sup>1</sup>H NMR spectrum of analogue **6f**; 600 MHz/CDCl<sub>3</sub>/TMS; δ (ppm).

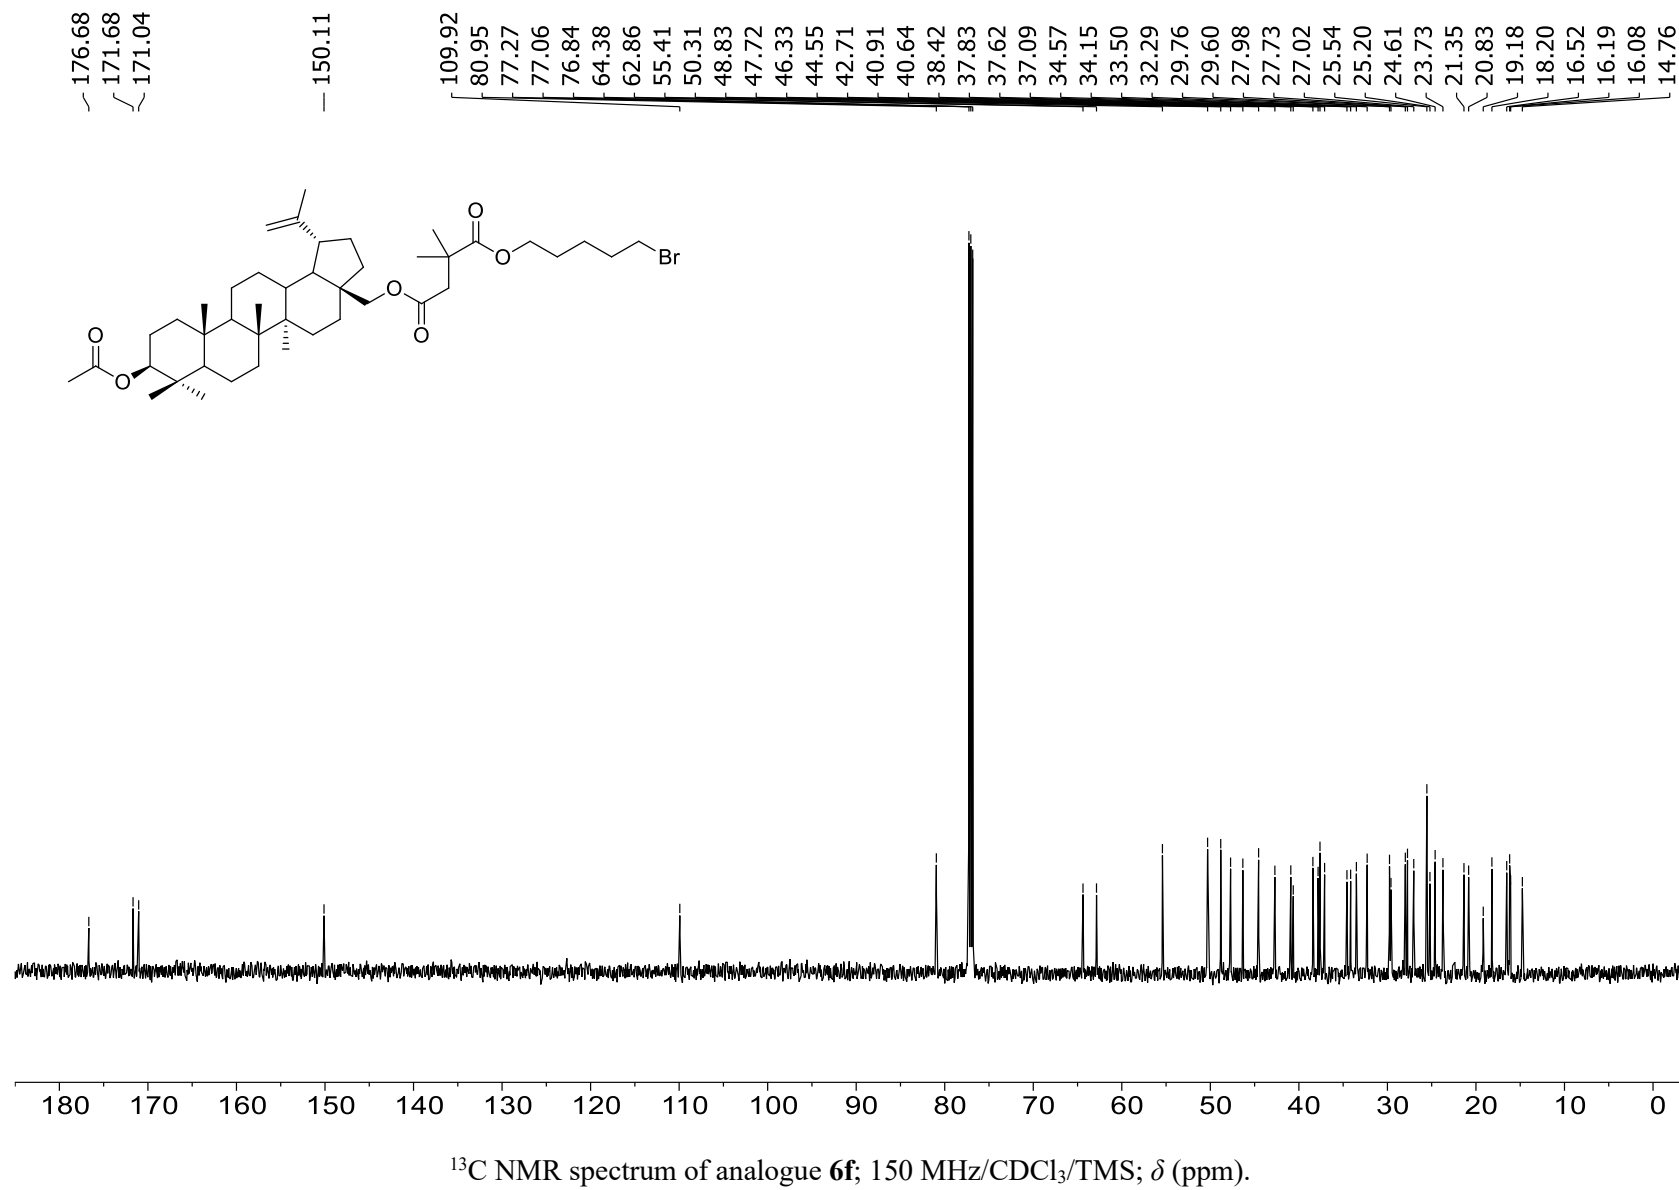

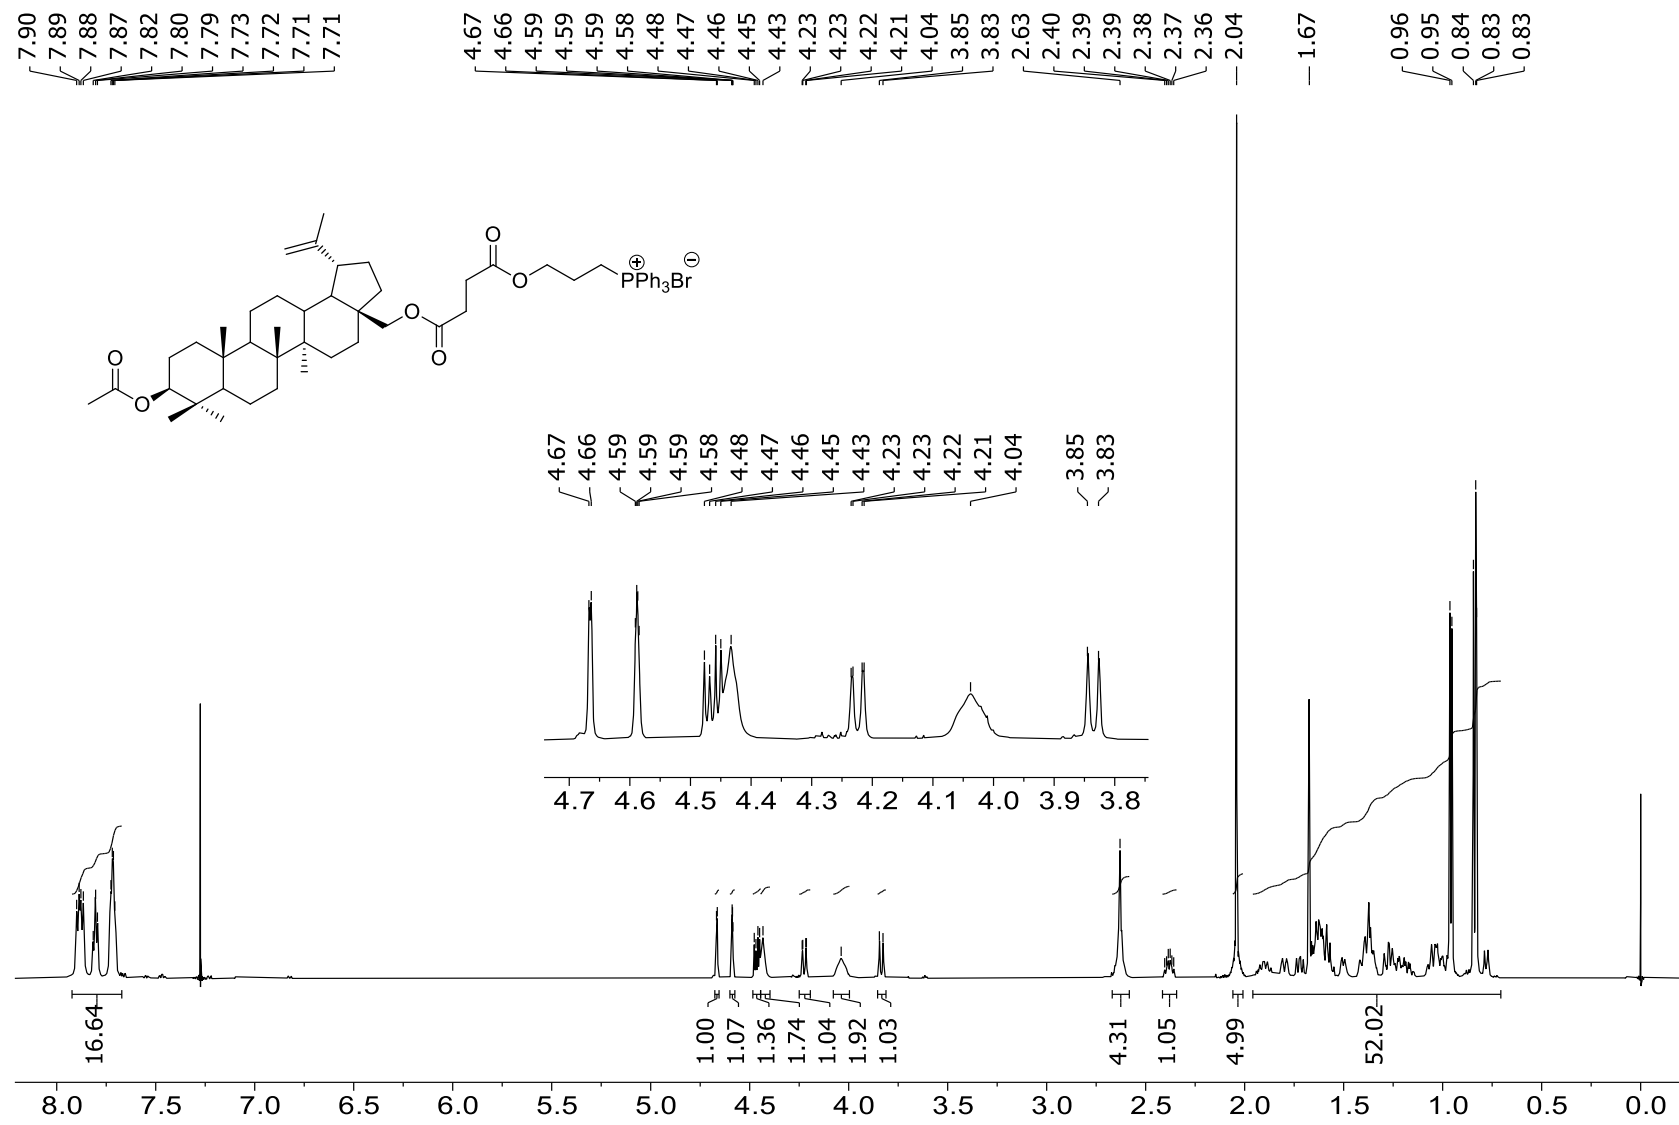

<sup>1</sup>H NMR spectrum of analogue **7a**; 600 MHz/CDCl<sub>3</sub>/TMS; δ (ppm).





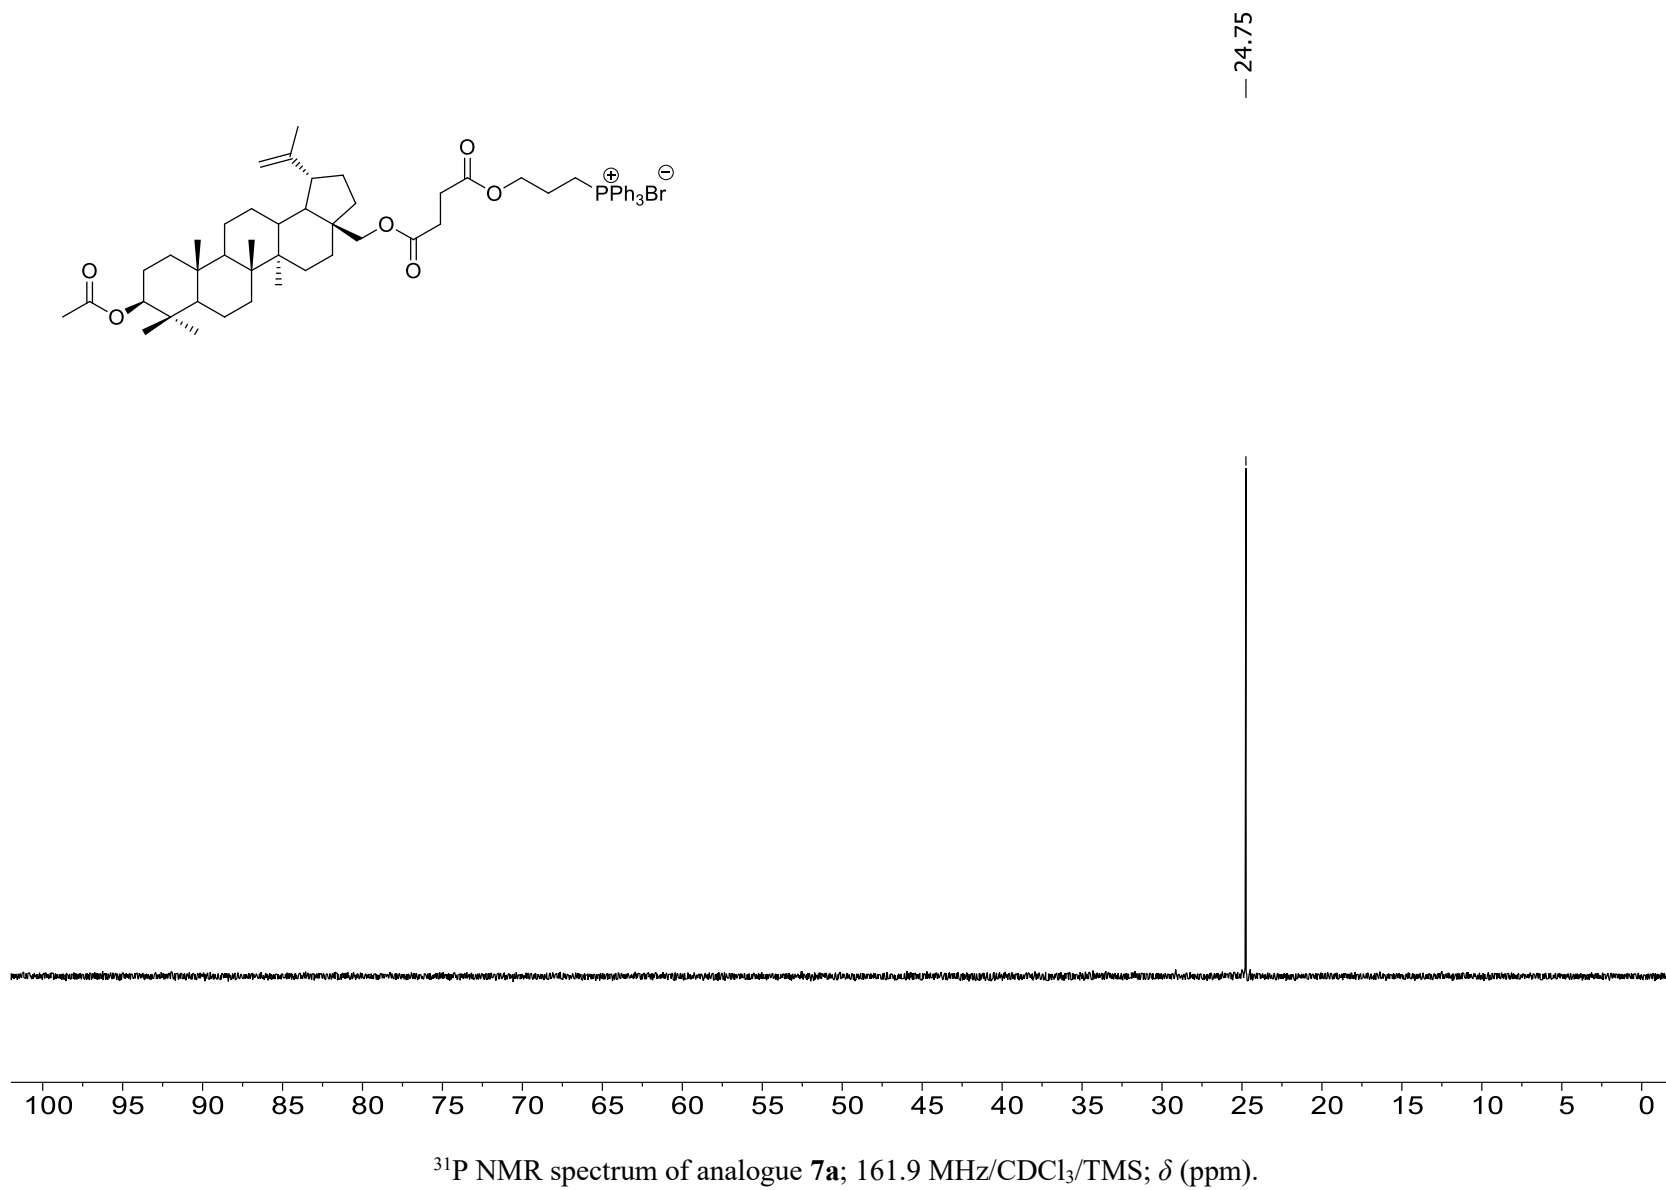

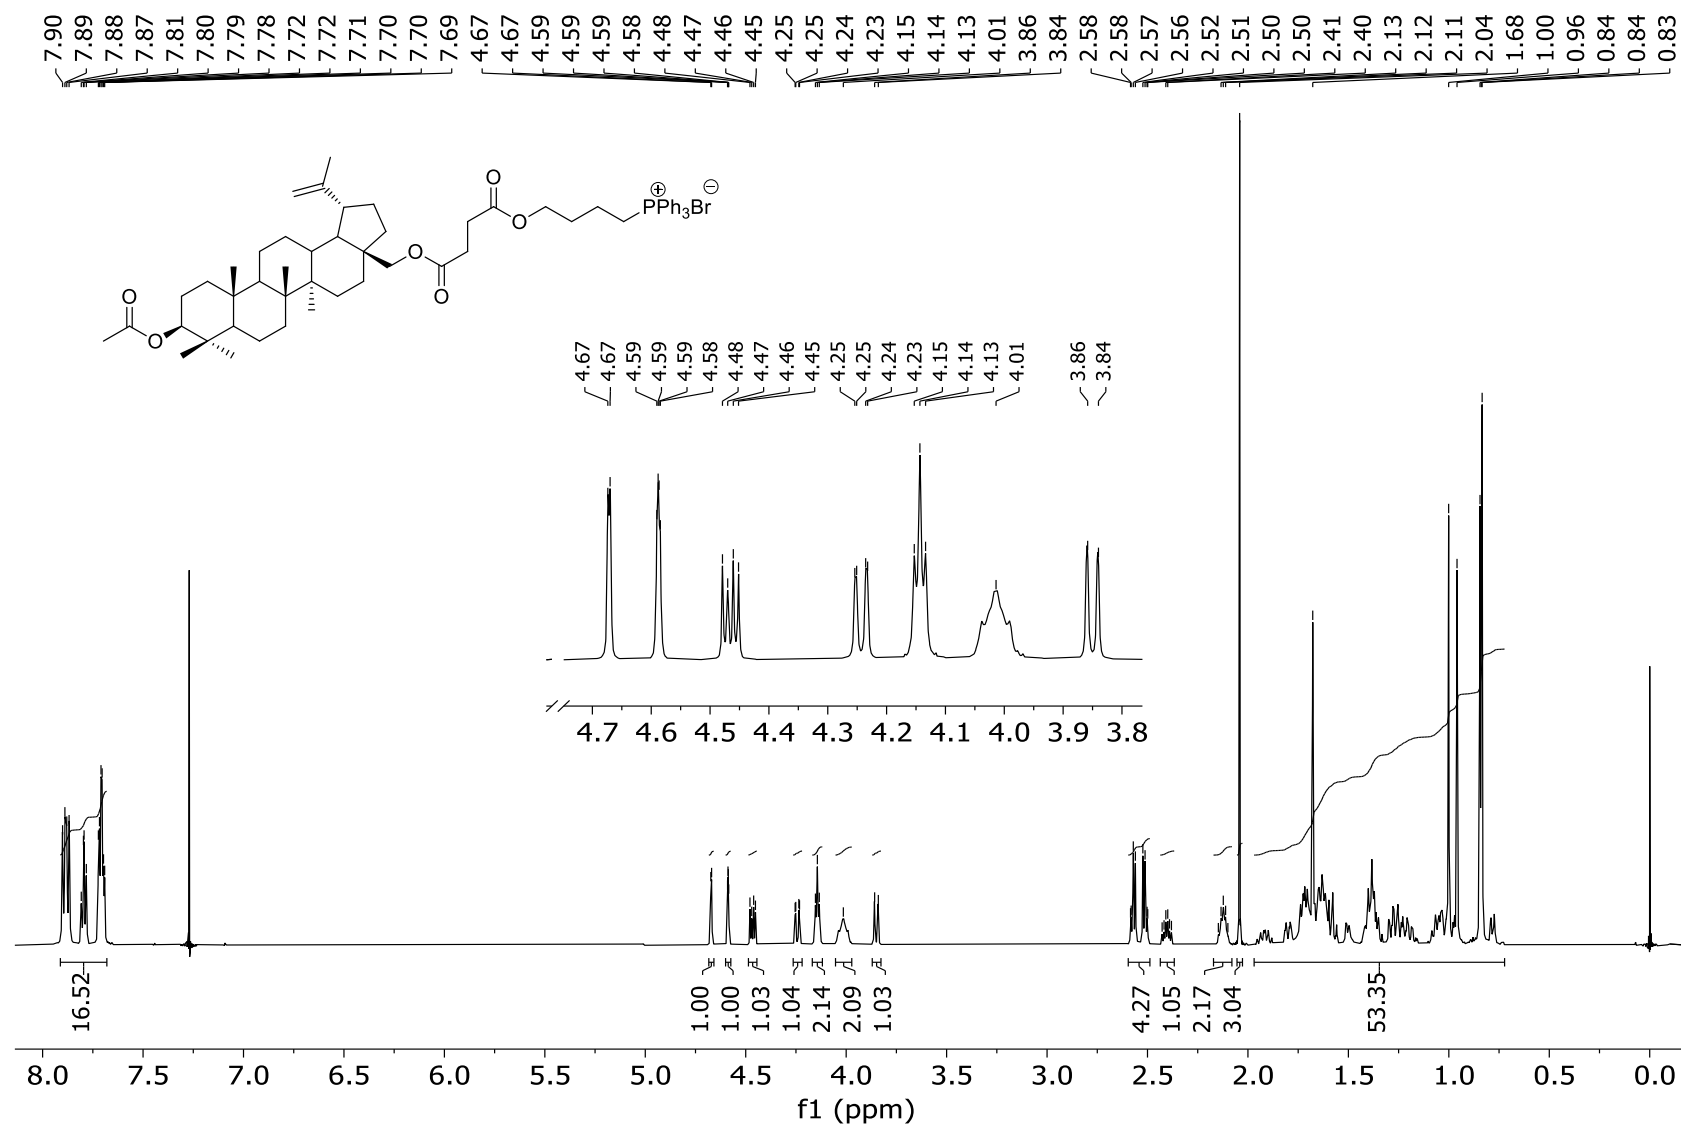

<sup>1</sup>H NMR spectrum of analogue **7b**; 600 MHz/CDCl<sub>3</sub>/TMS; δ (ppm).

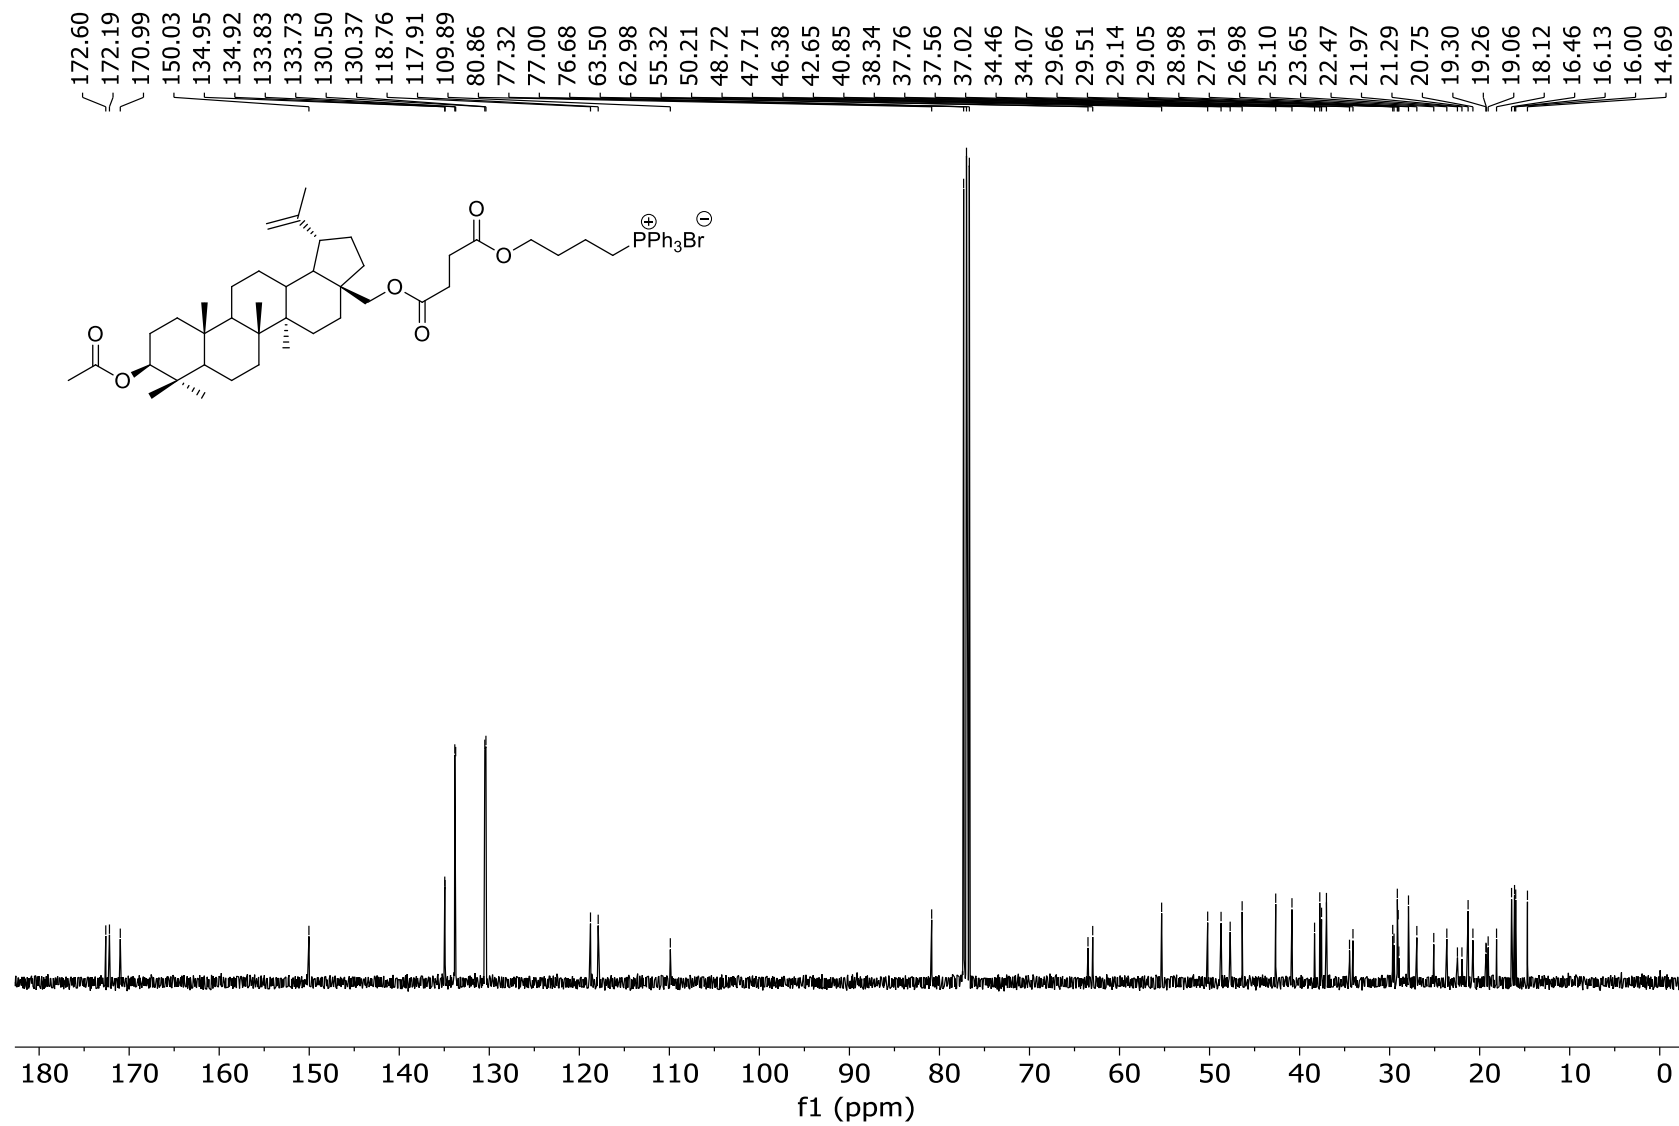

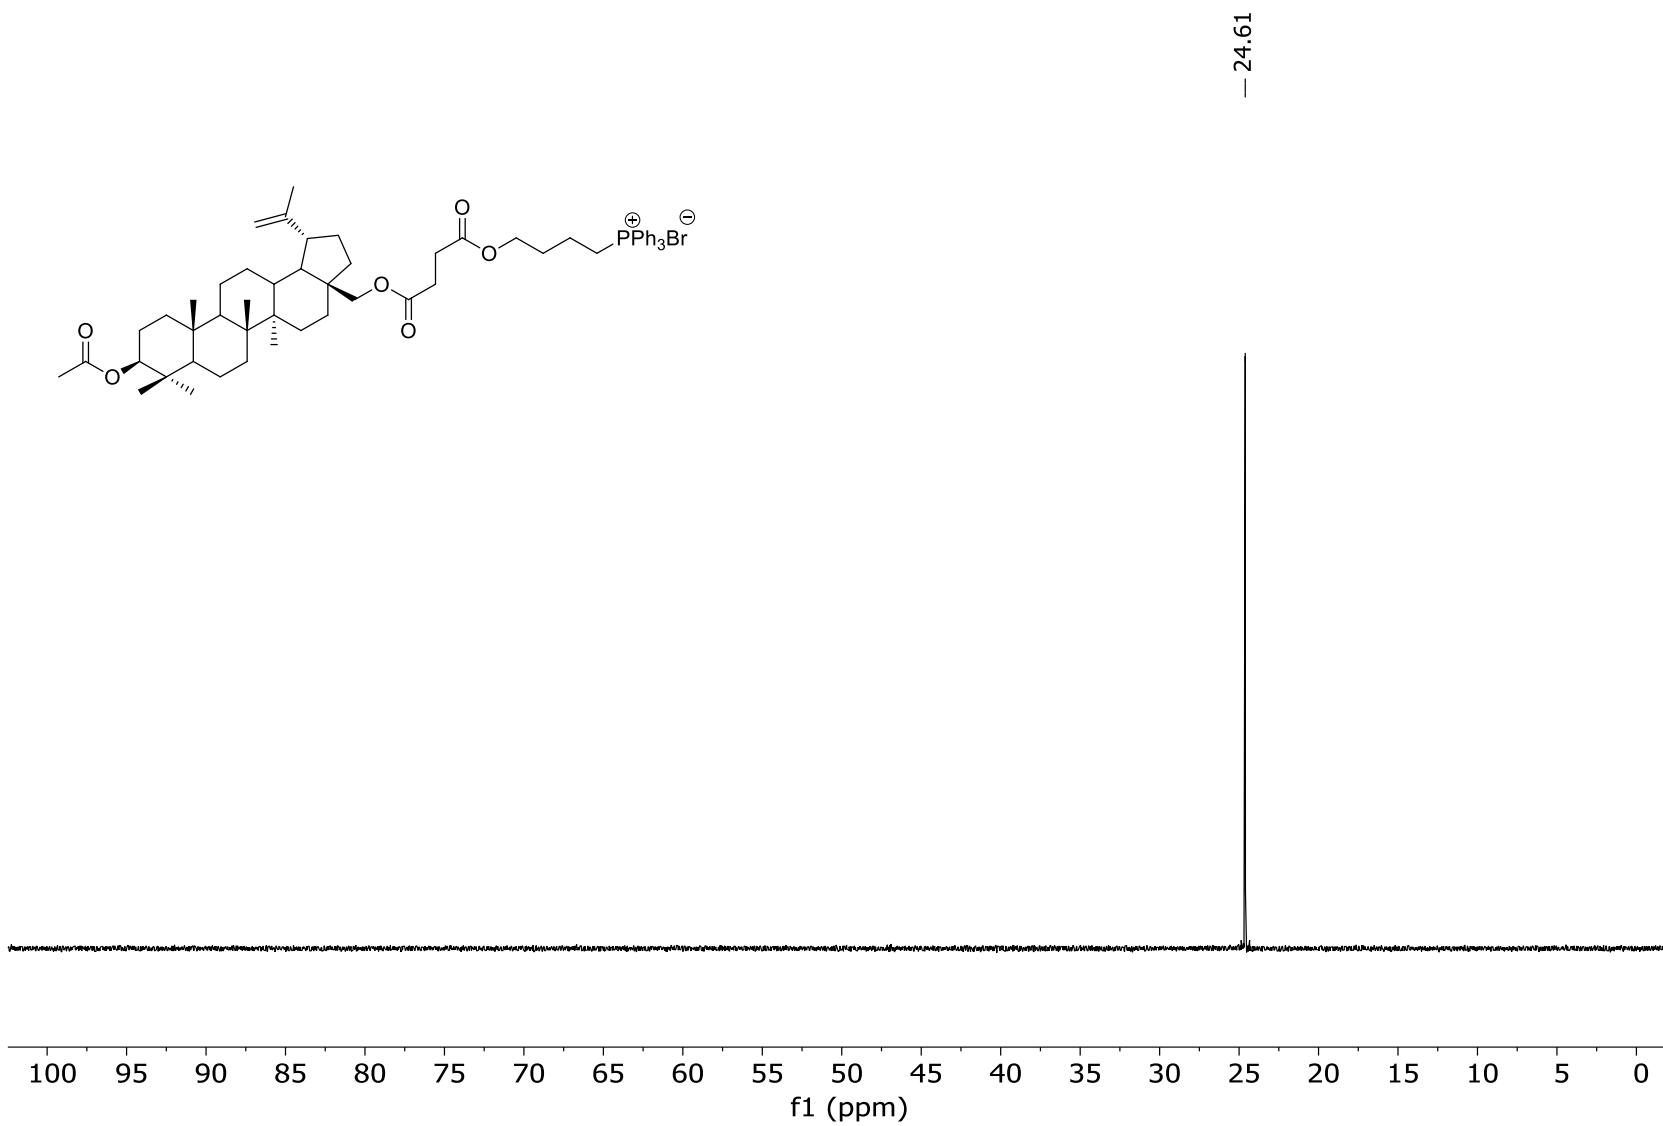

$^{31}\text{P}$  NMR spectrum of analogue **7b**; 161.9 MHz/ $\text{CDCl}_3$ /TMS;  $\delta$  (ppm).

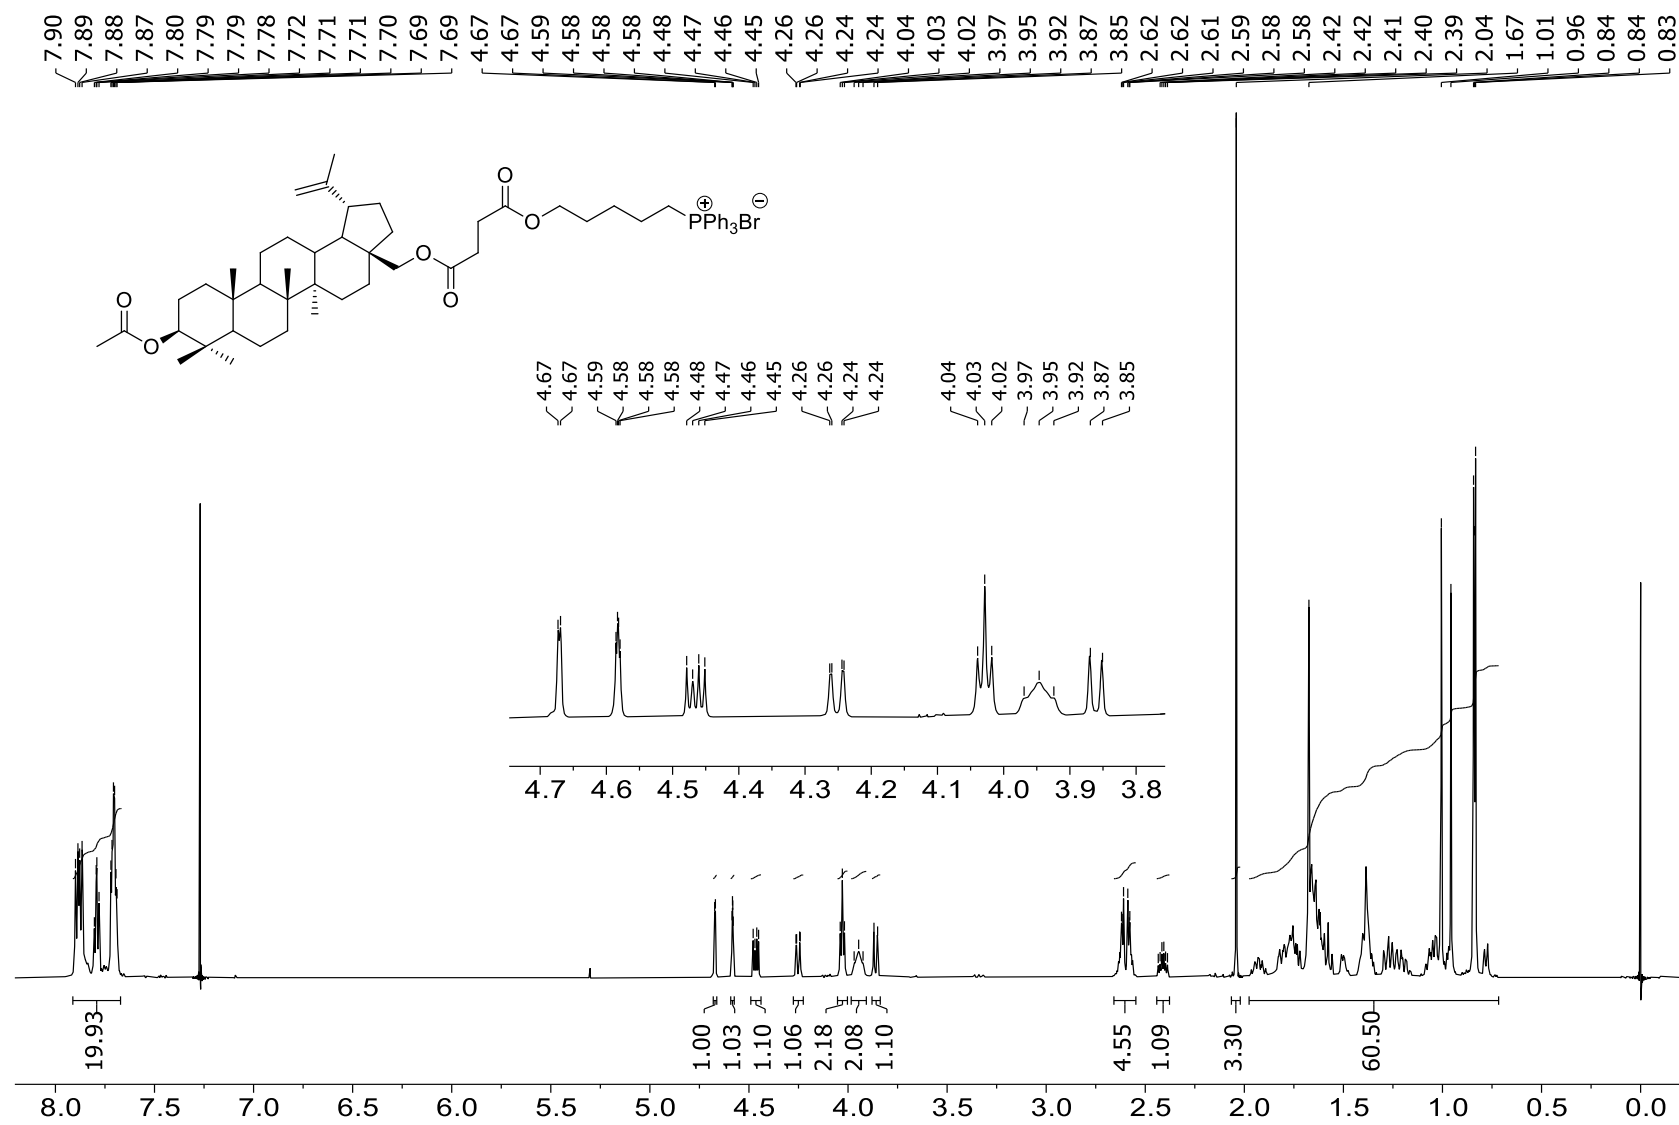

<sup>1</sup>H NMR spectrum of analogue **7c**; 600 MHz/CDCl<sub>3</sub>/TMS; δ (ppm).

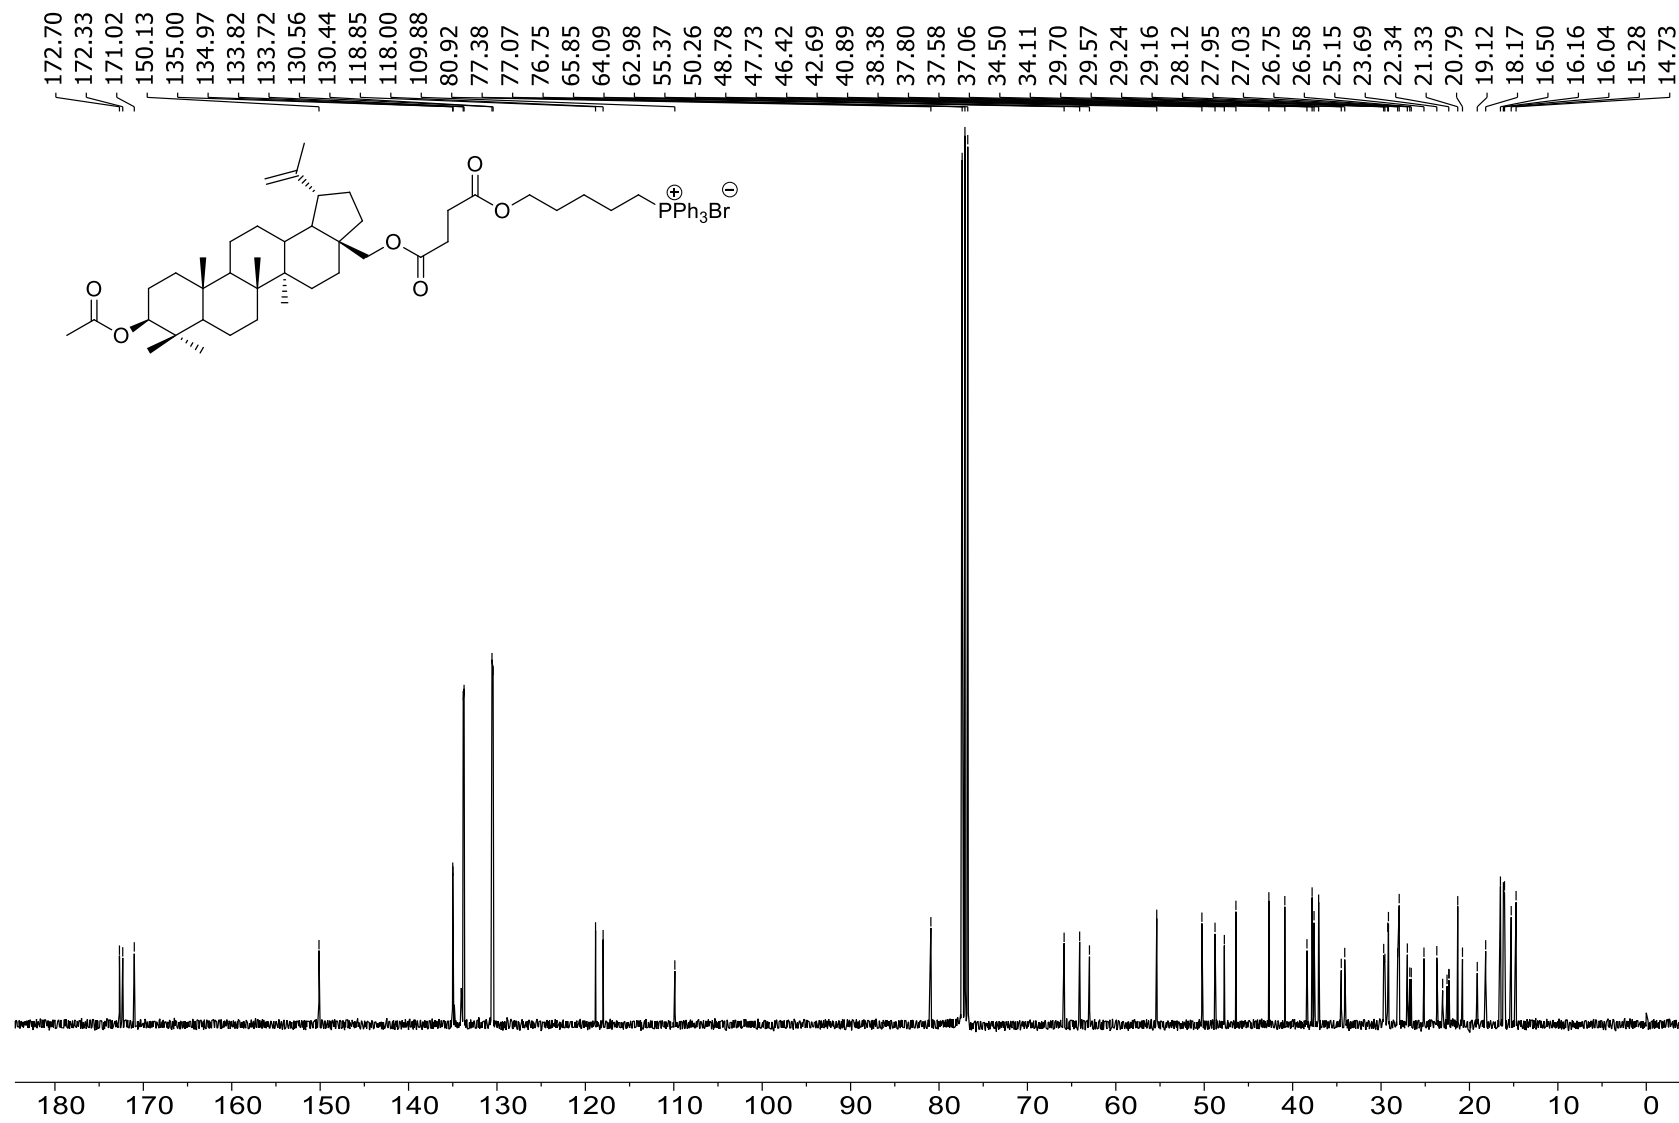

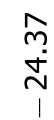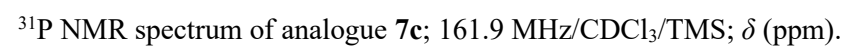



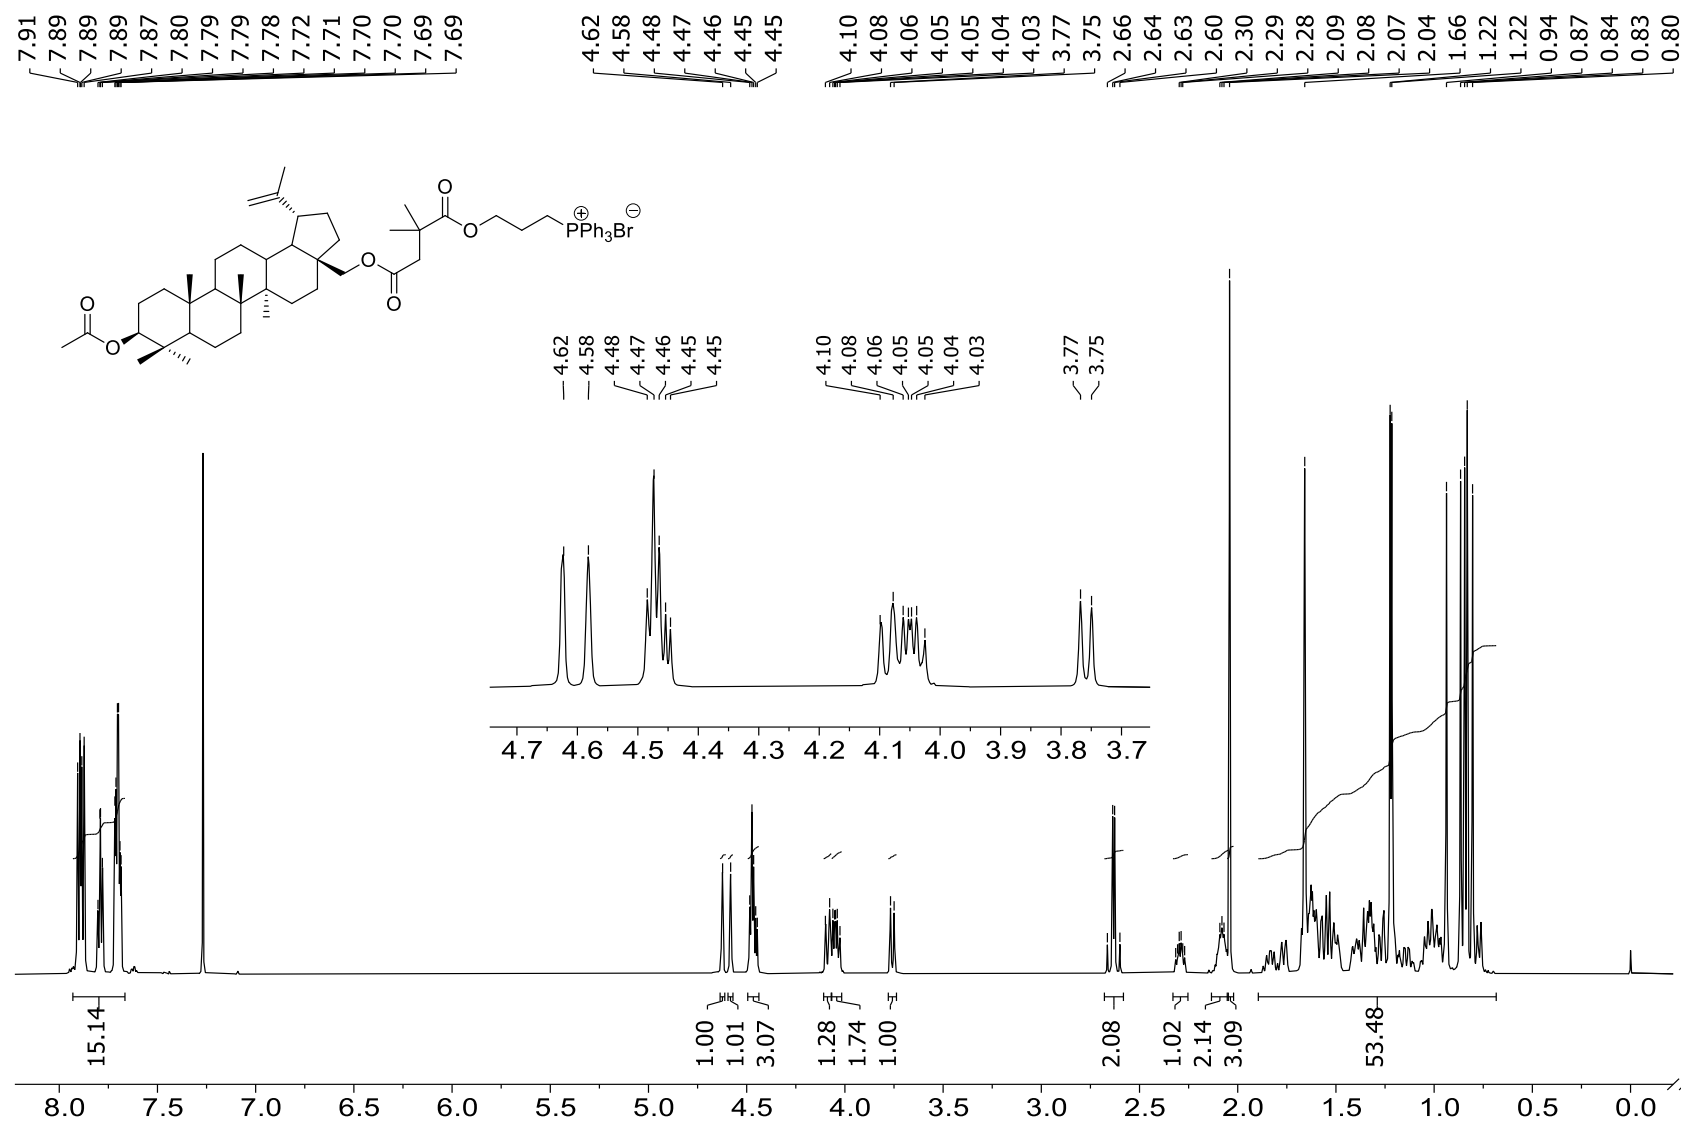

<sup>1</sup>H NMR spectrum of analogue **7d**; 600 MHz/CDCl<sub>3</sub>/TMS; δ (ppm).

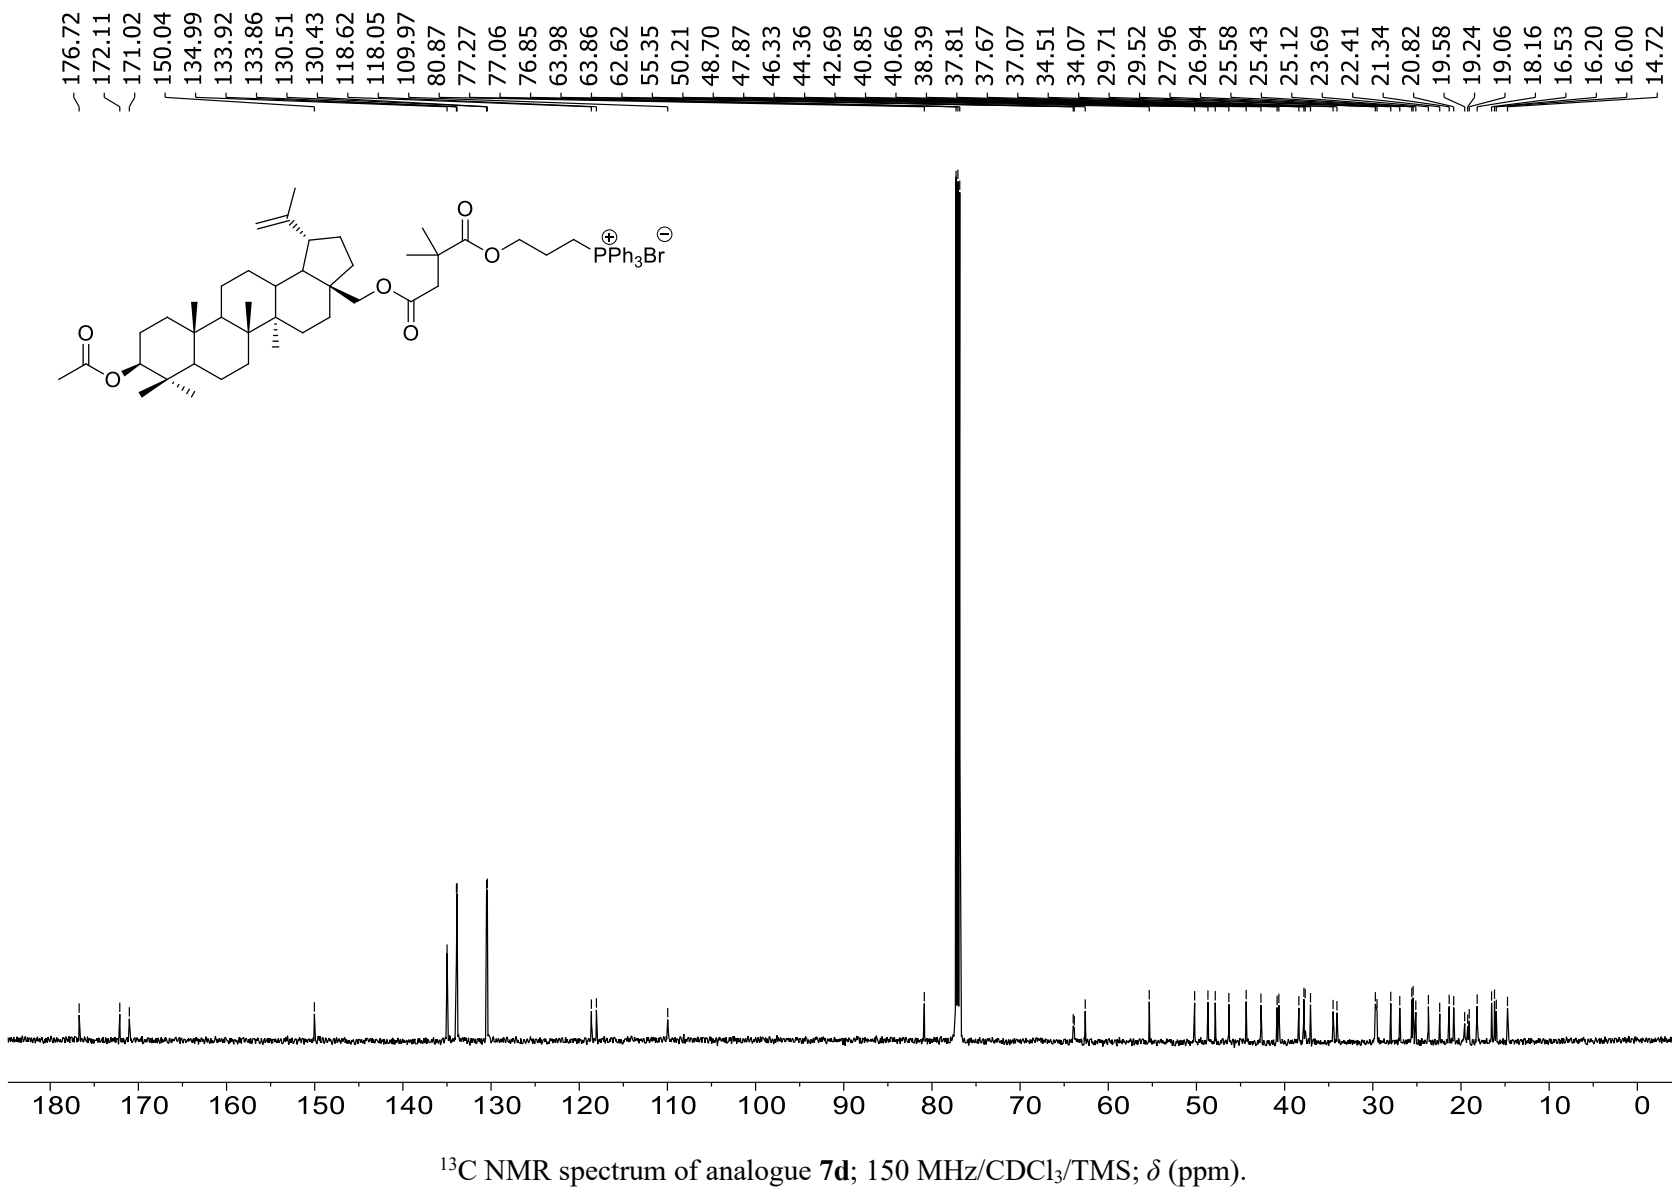

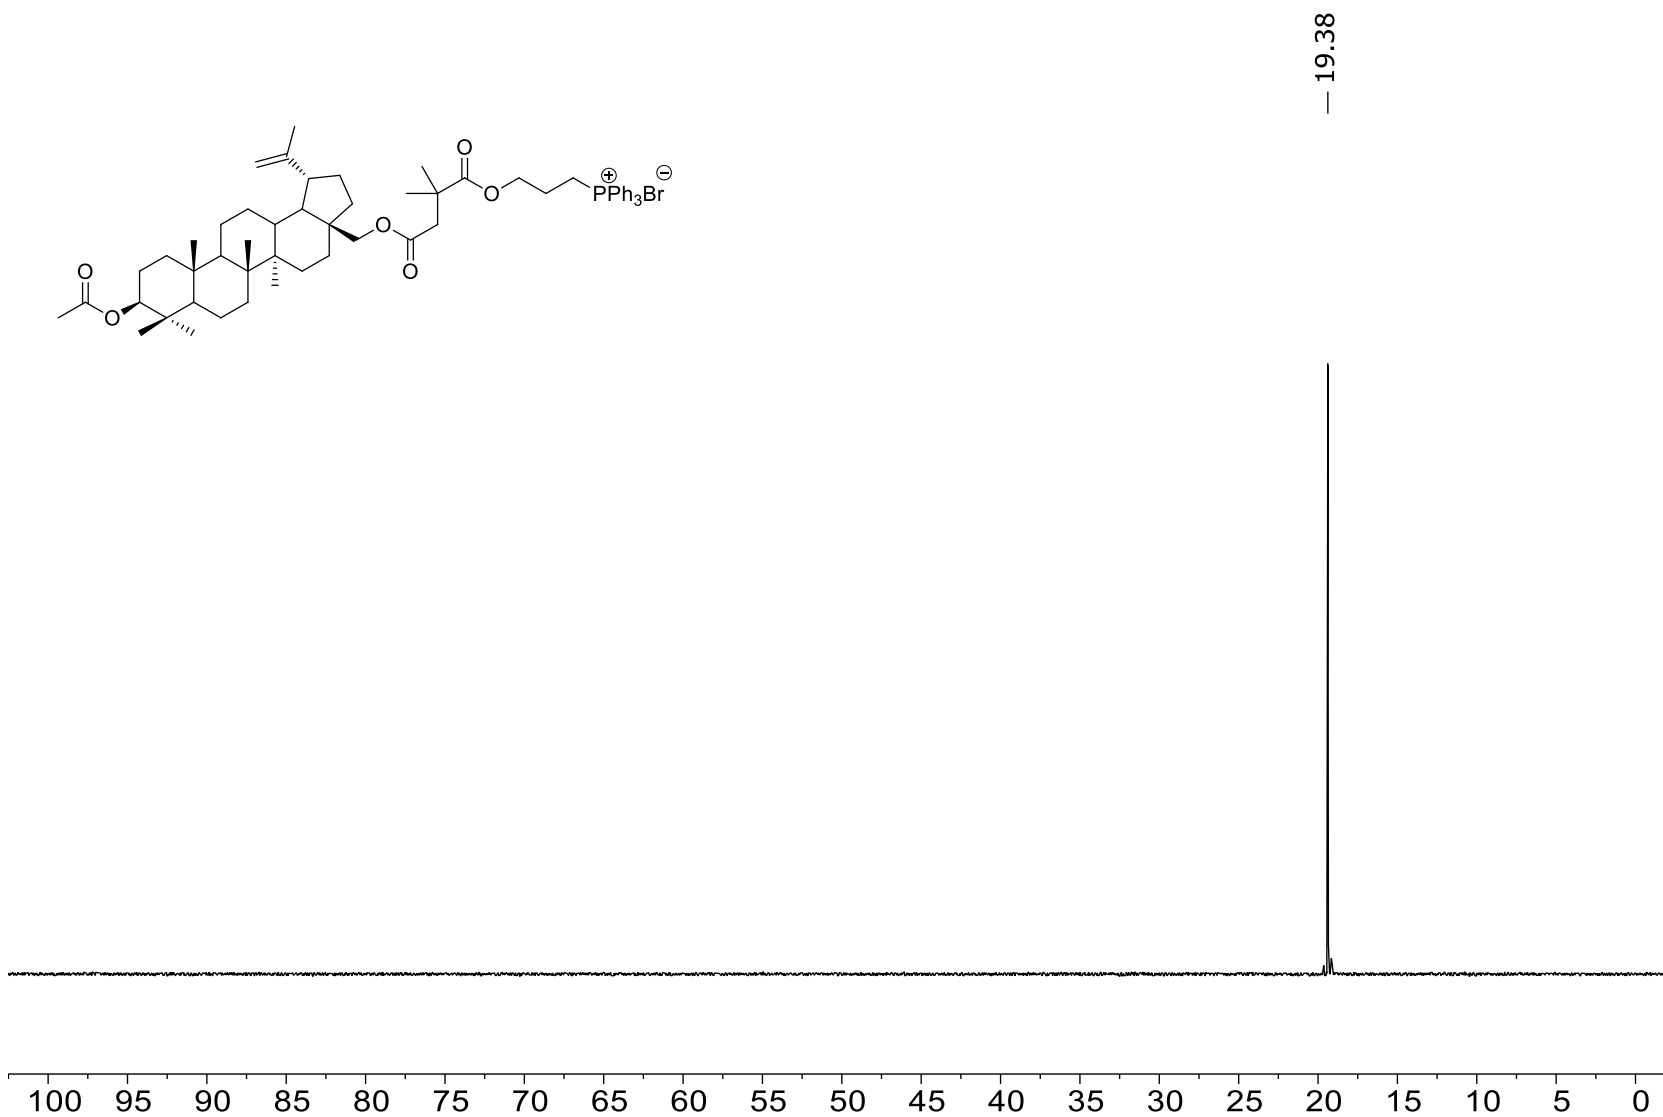

$^{31}\text{P}$  NMR spectrum of analogue **7d**; 161.9 MHz/ $\text{CDCl}_3$ /TMS;  $\delta$  (ppm).

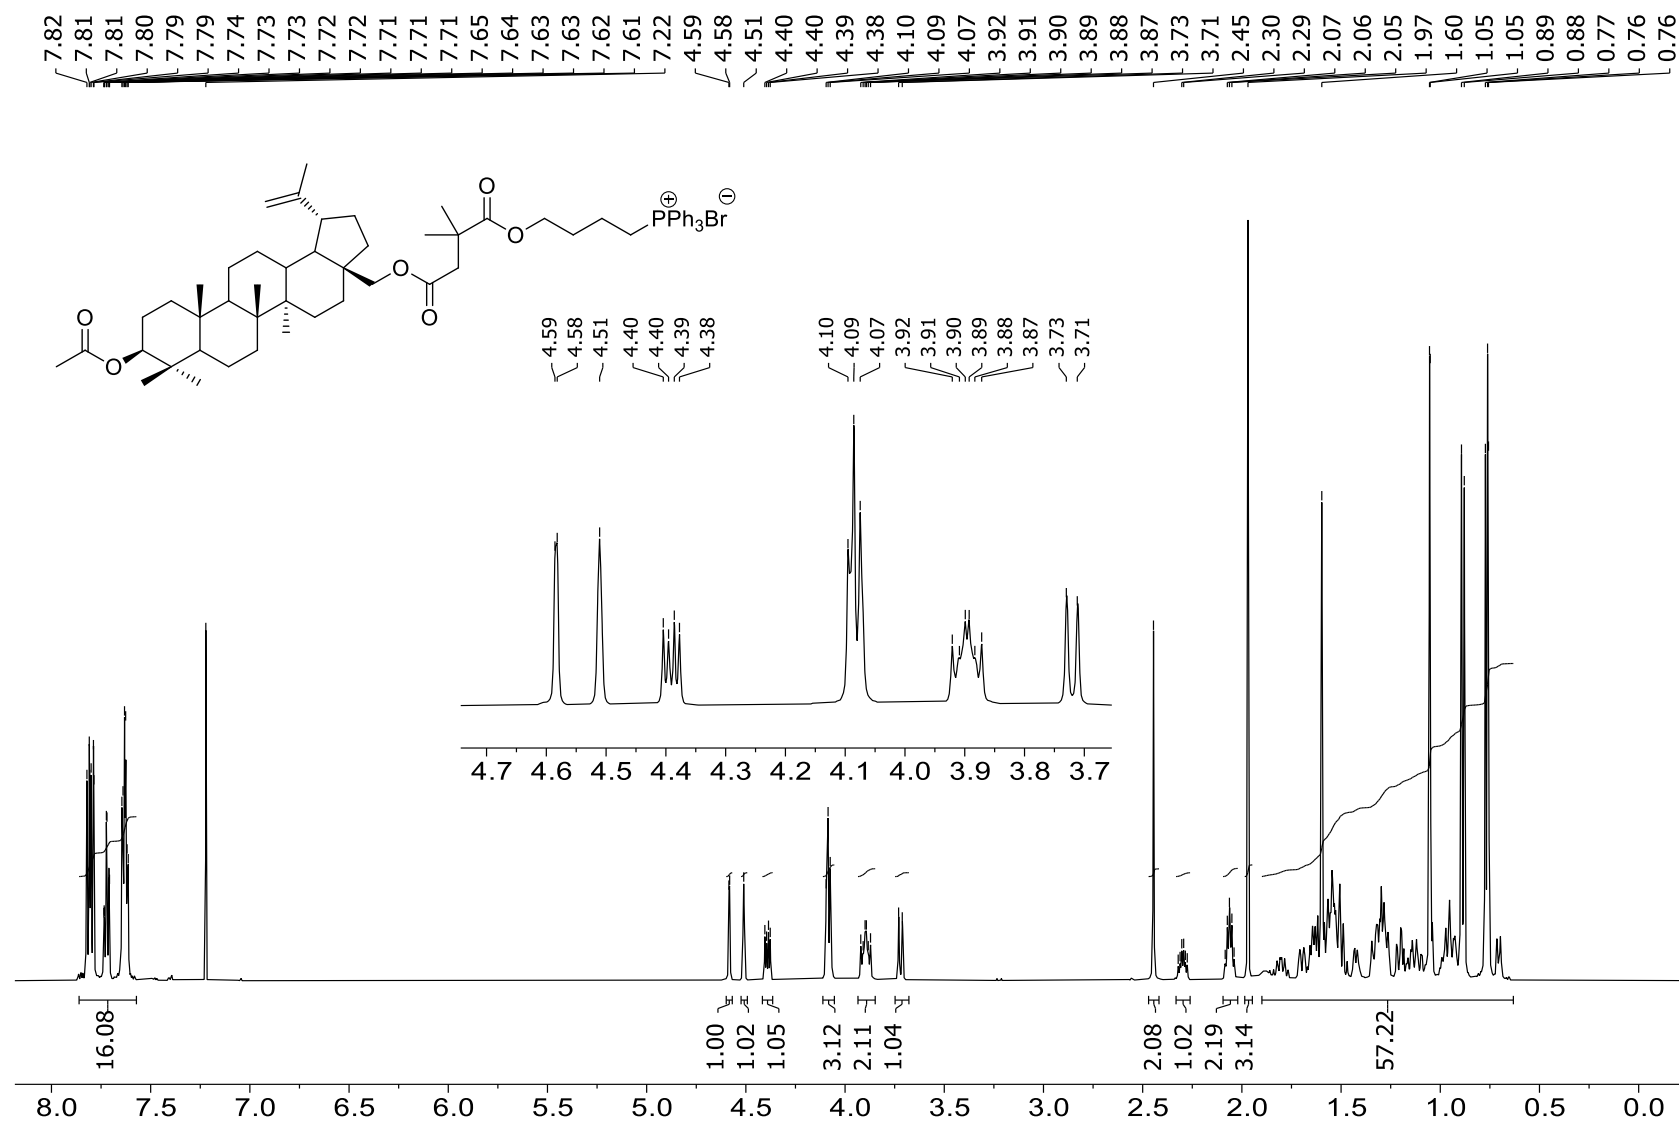

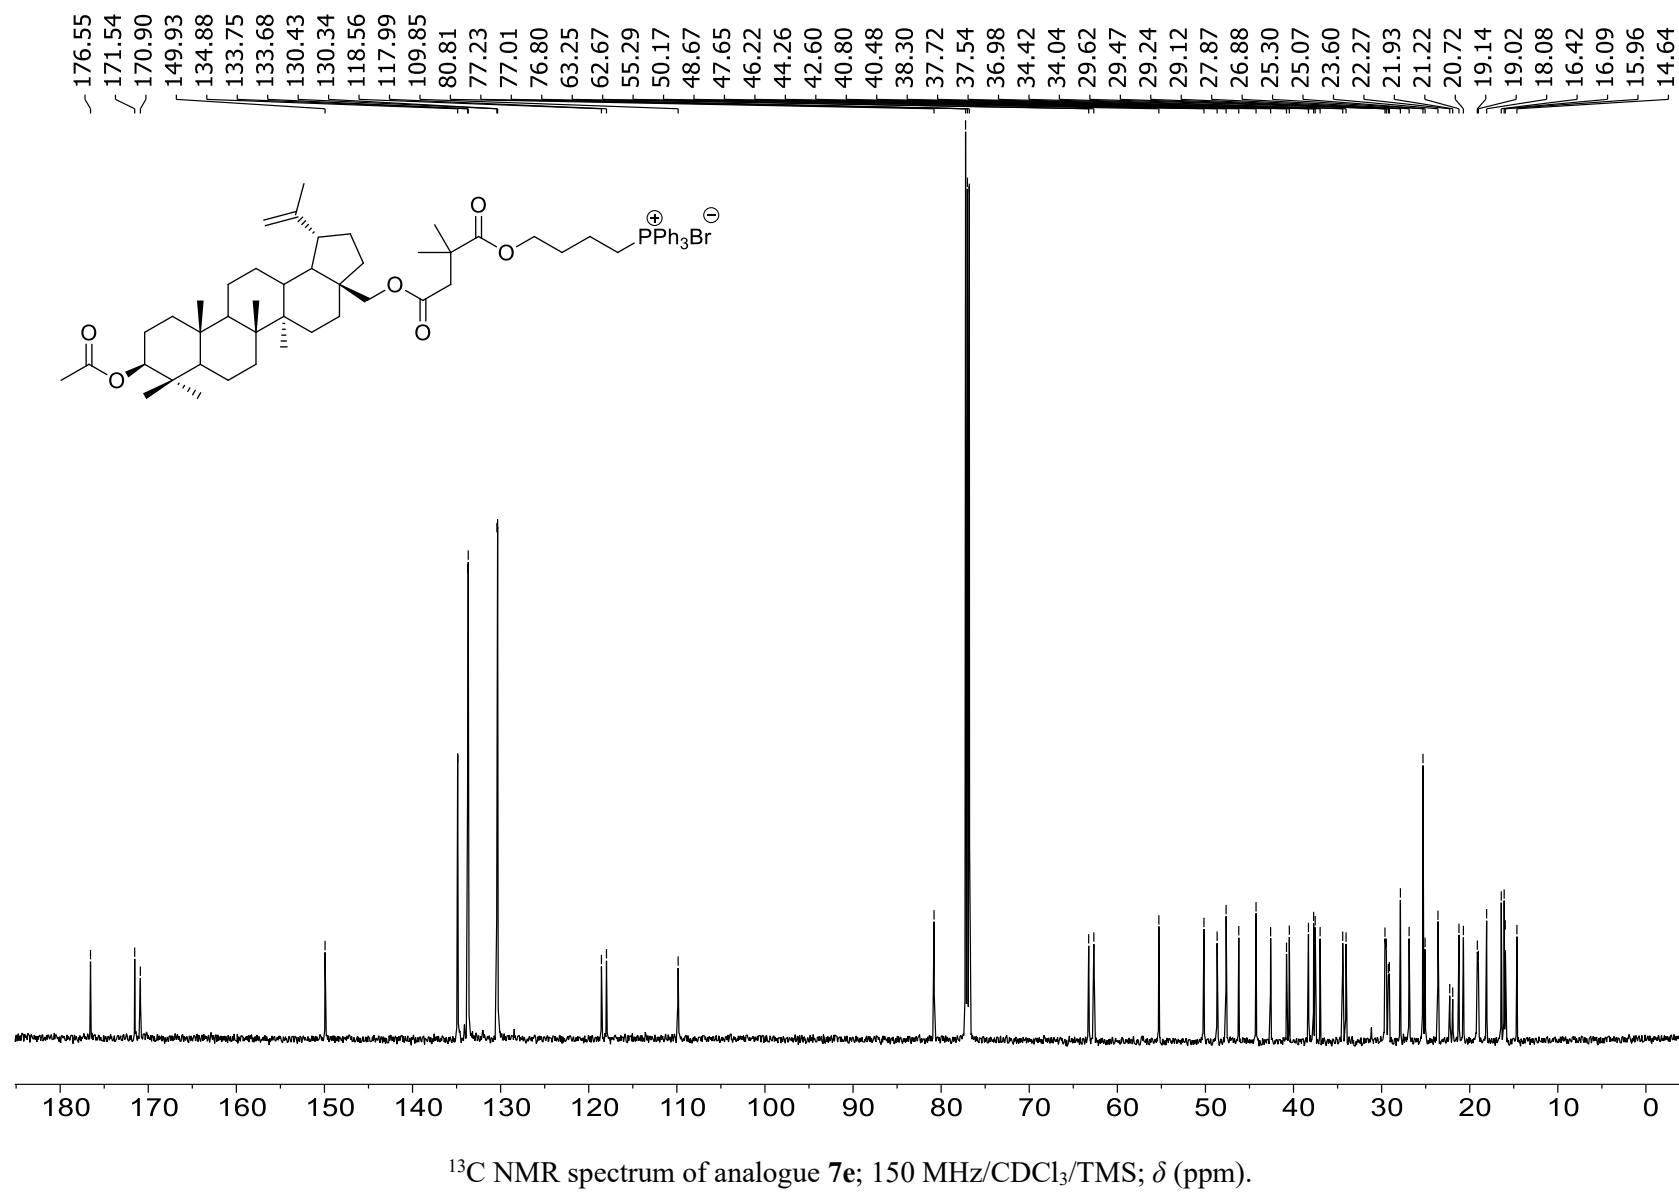

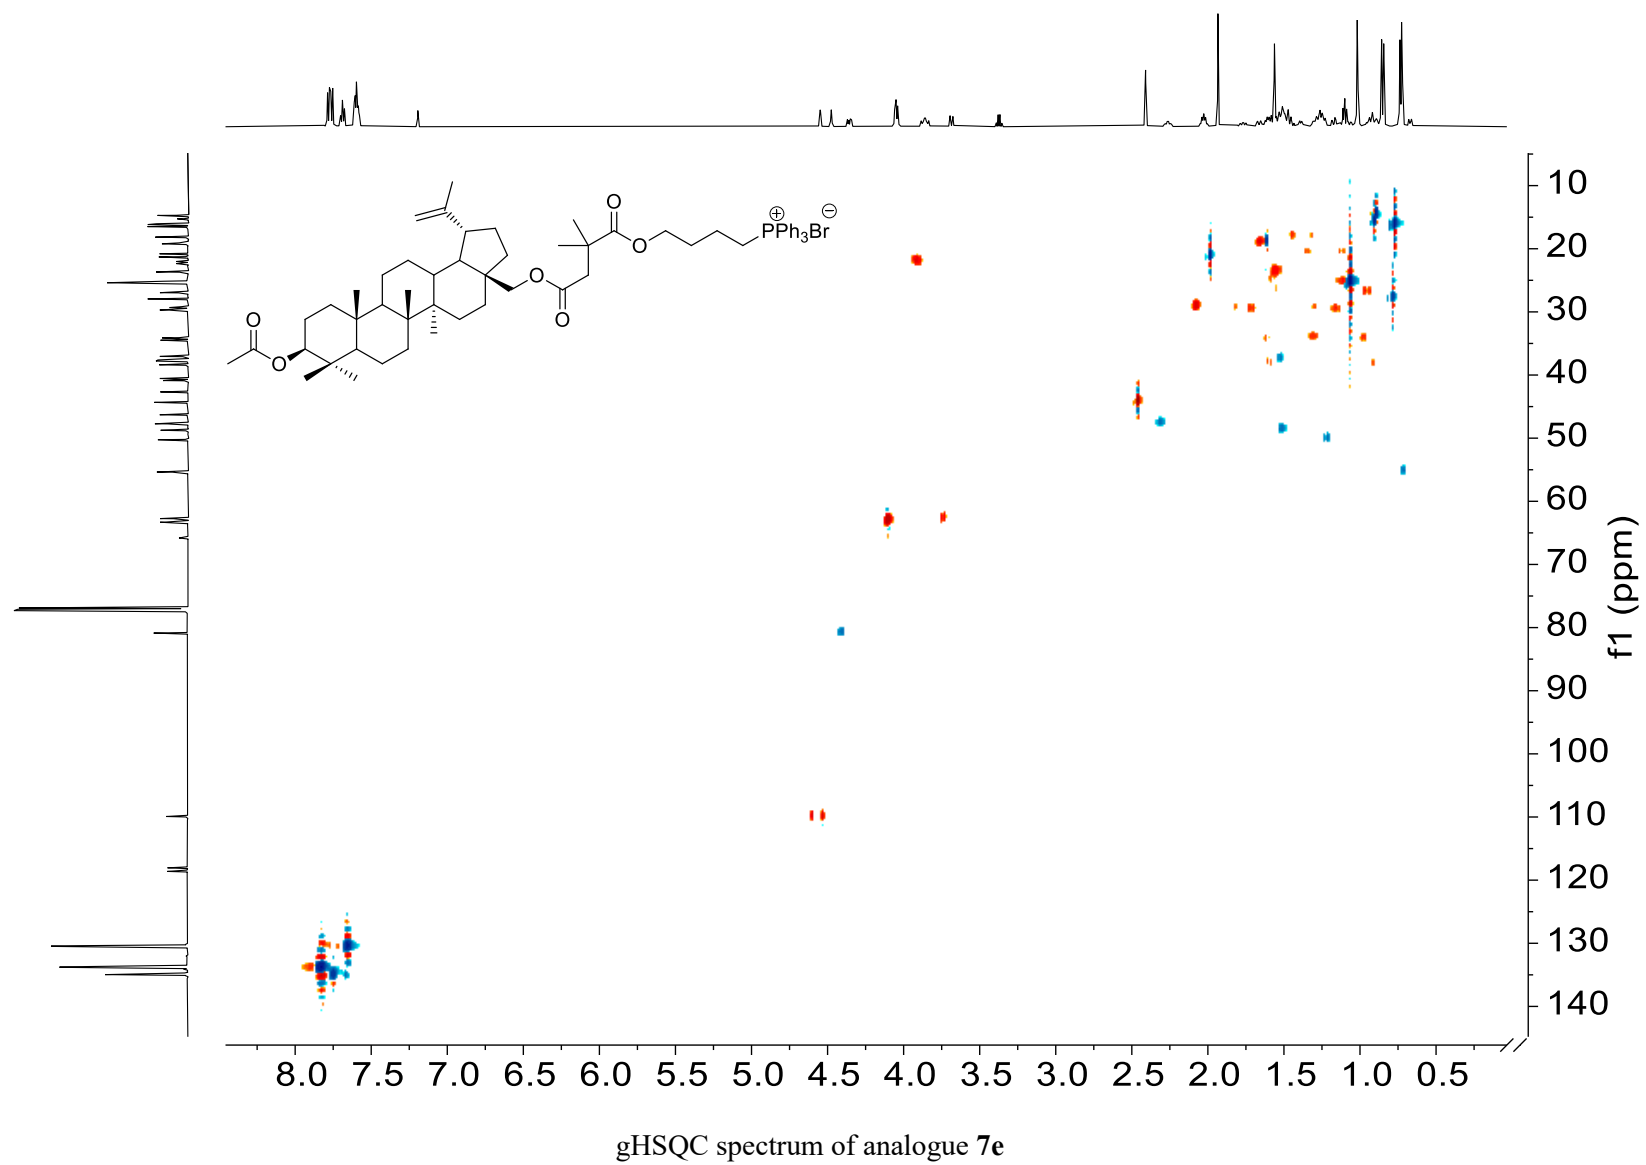

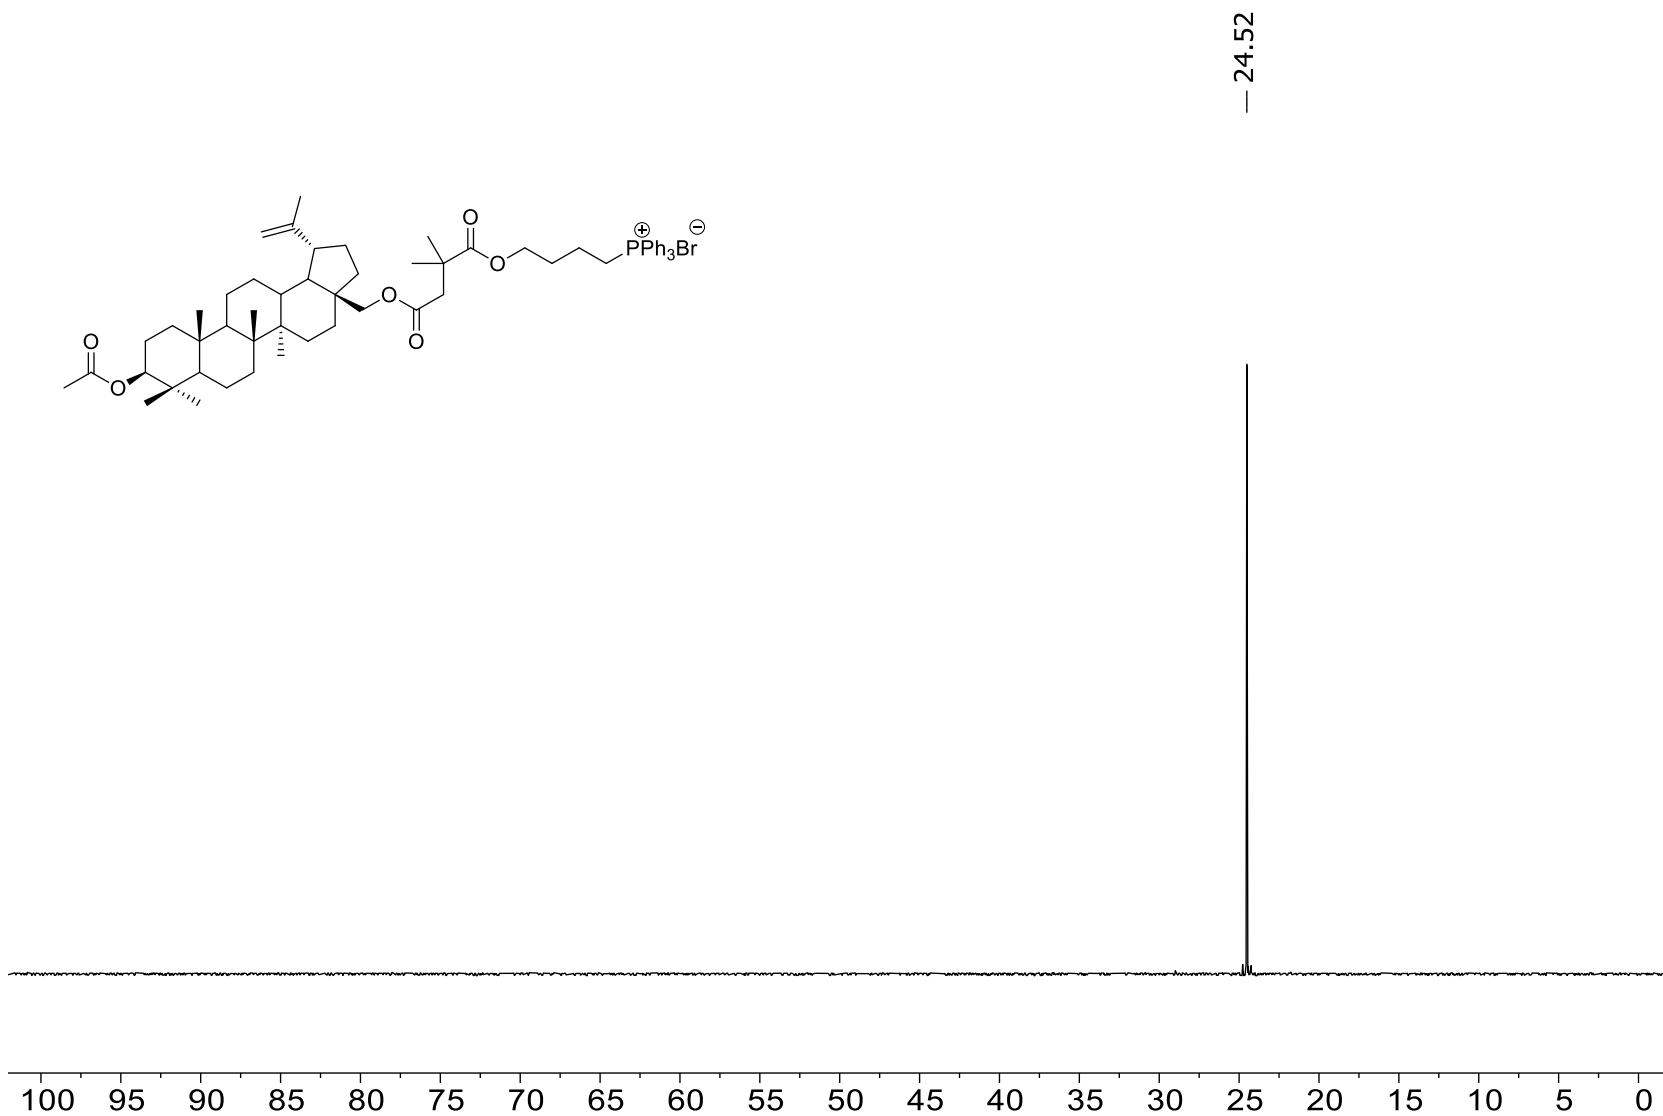

$^{31}\text{P}$  NMR spectrum of analogue **7e**; 161.9 MHz/ $\text{CDCl}_3$ /TMS;  $\delta$  (ppm).

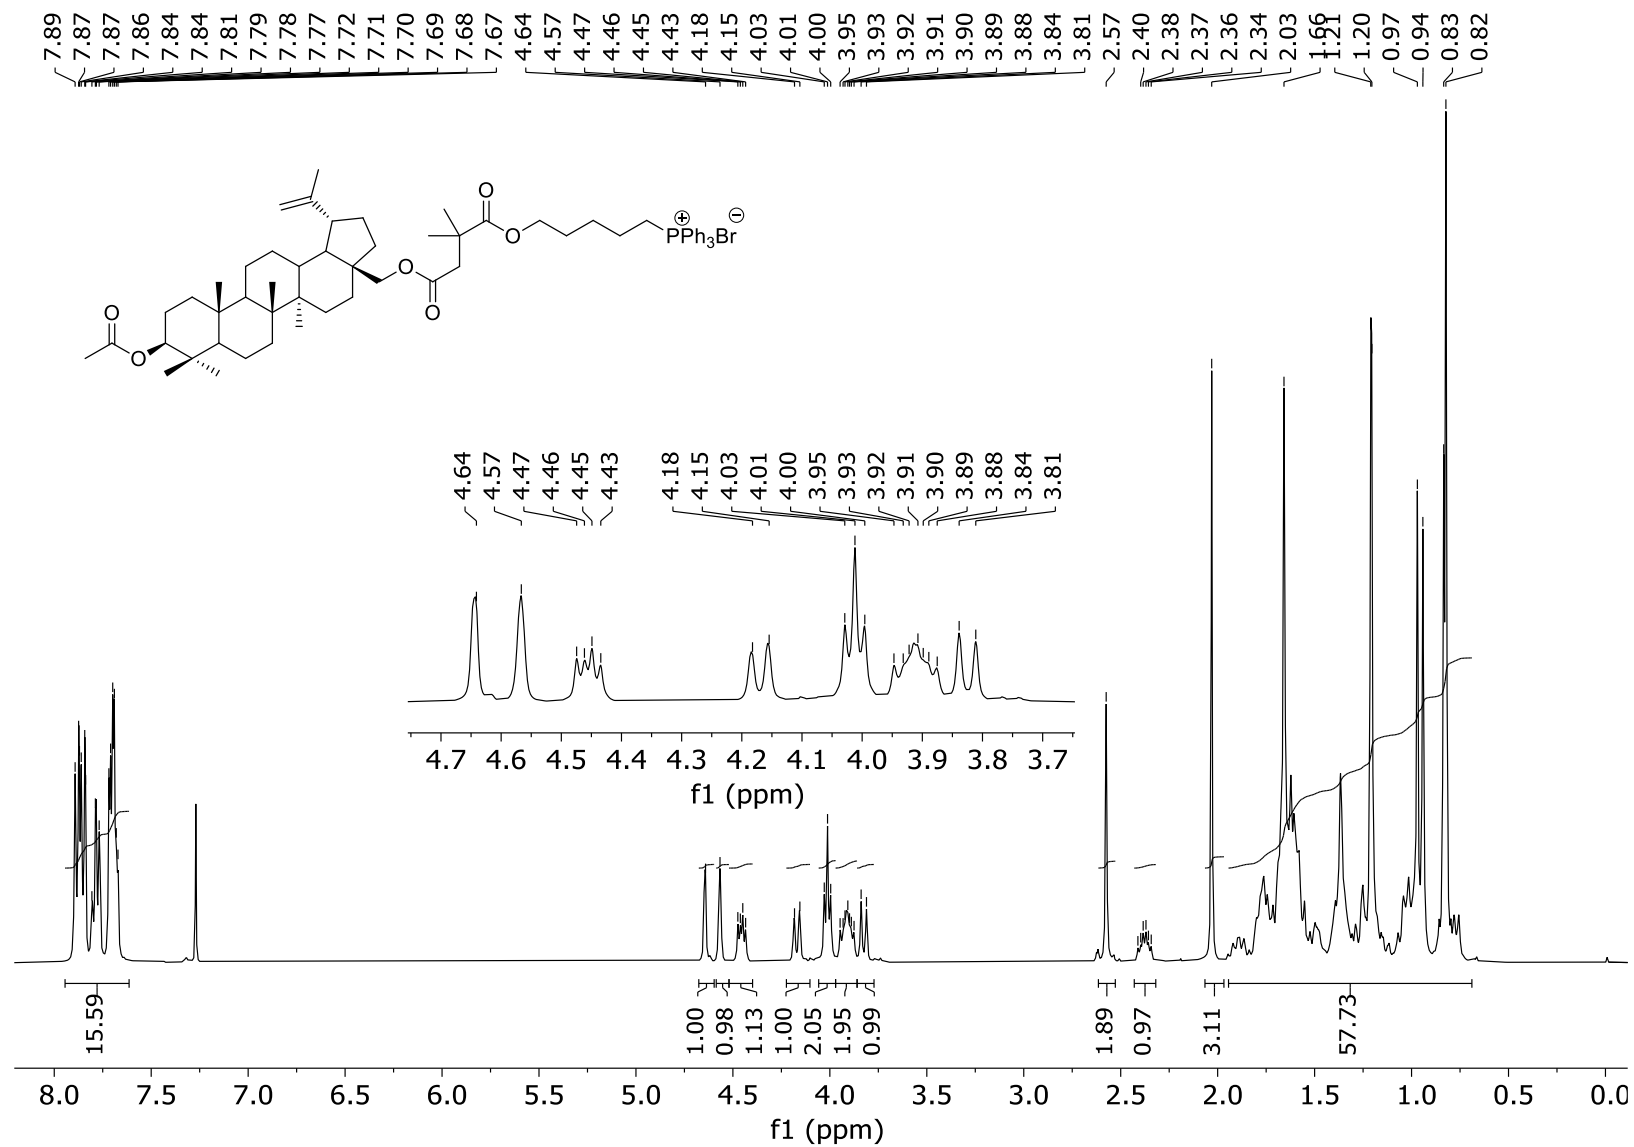

<sup>1</sup>H NMR spectrum of analogue **7f**; 400 MHz/CDCl<sub>3</sub>/TMS; δ (ppm).



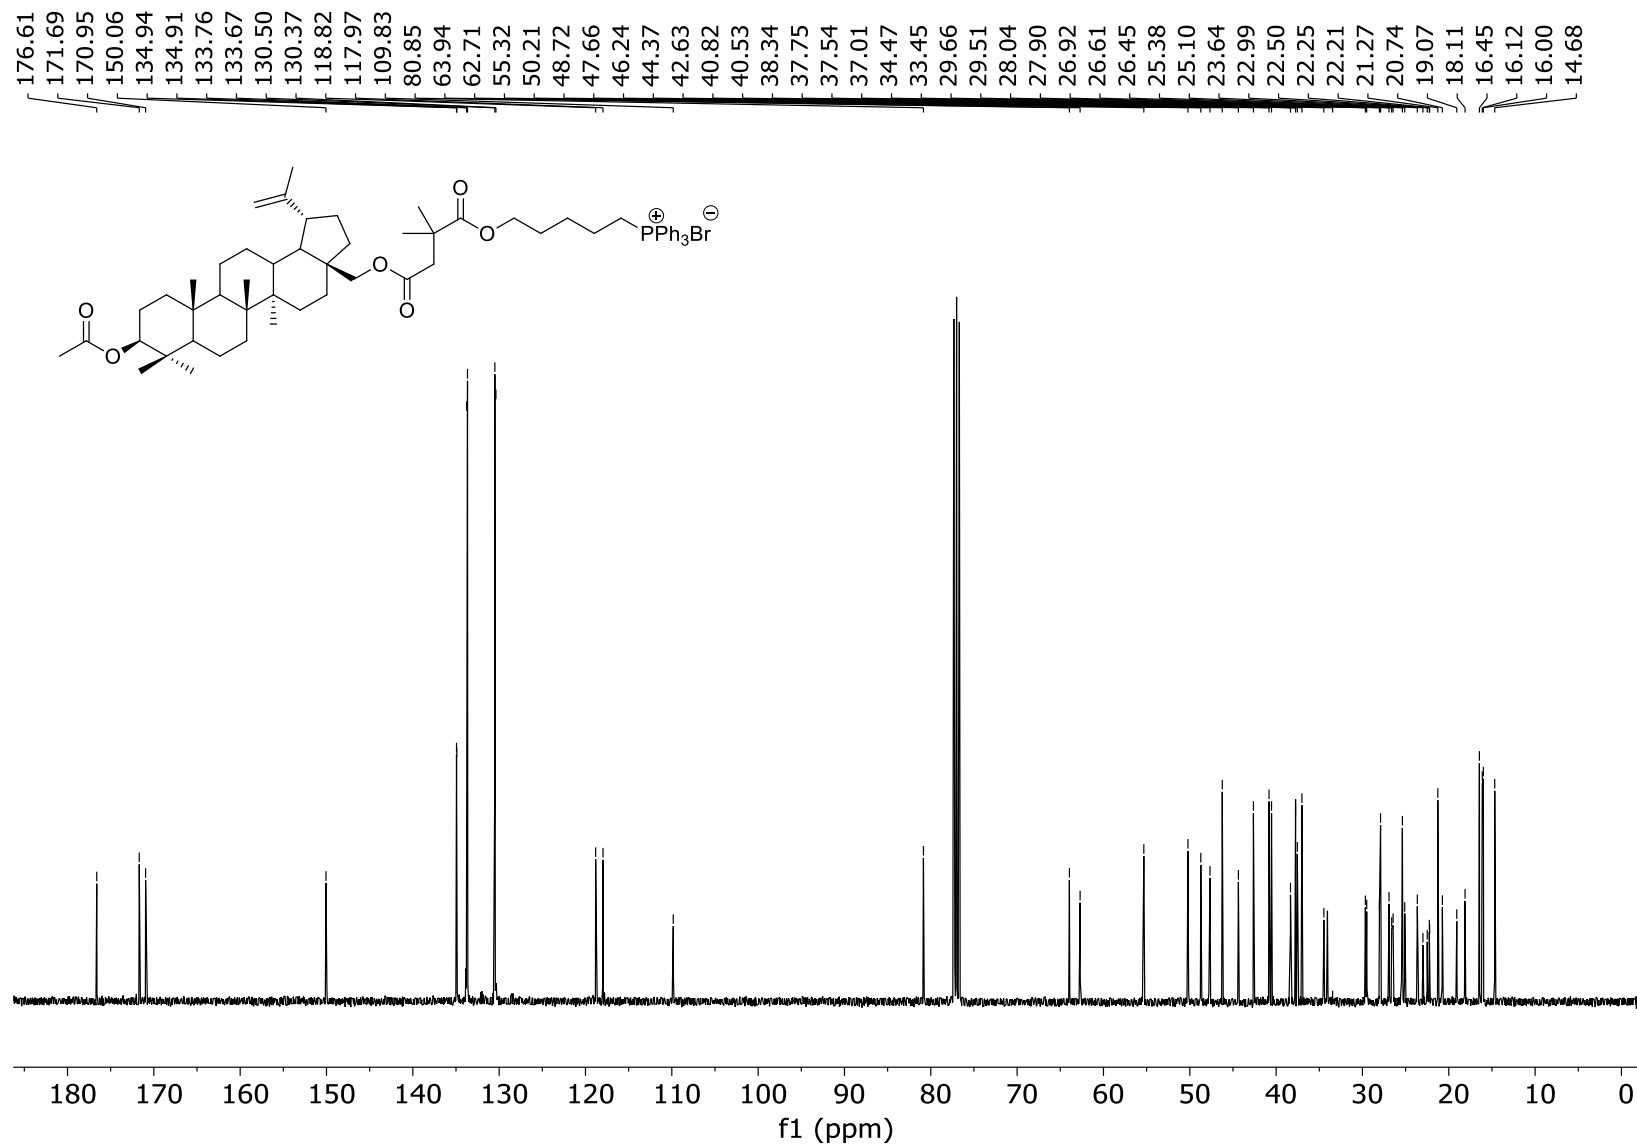

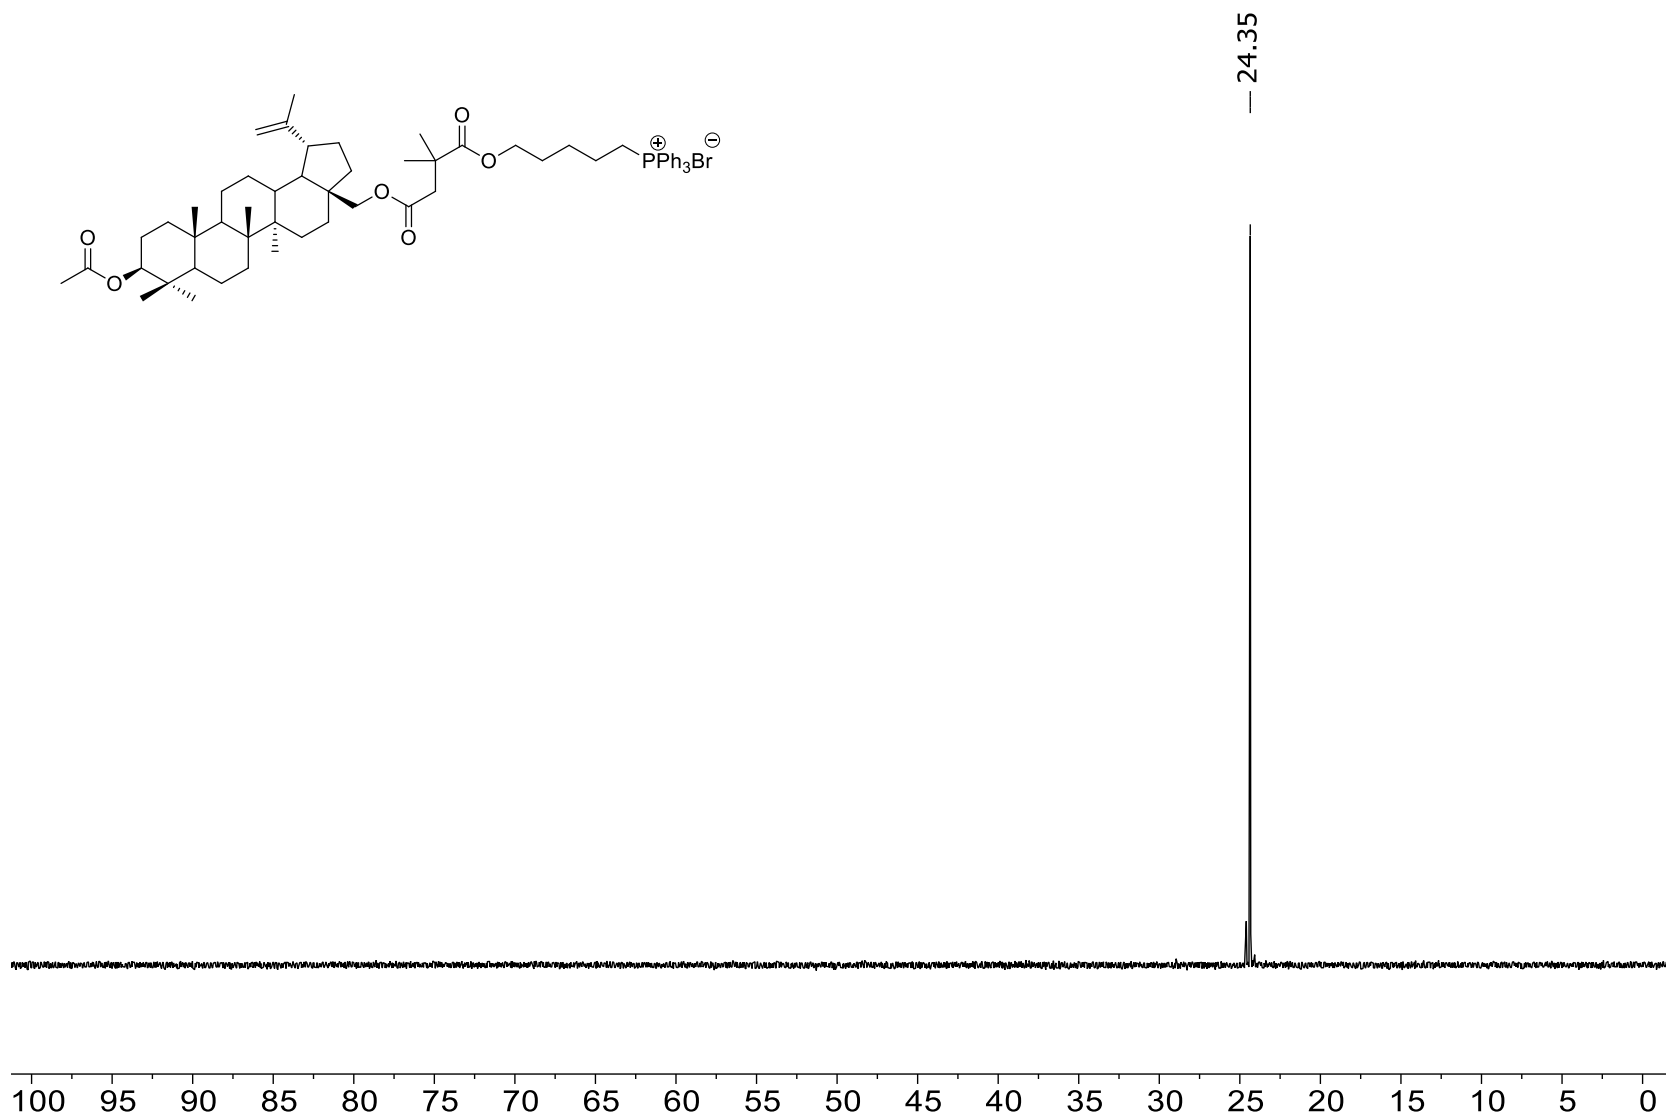

$^{31}\text{P}$  NMR spectrum of analogue 7f; 161.9 MHz/ $\text{CDCl}_3$ /TMS;  $\delta$  (ppm).

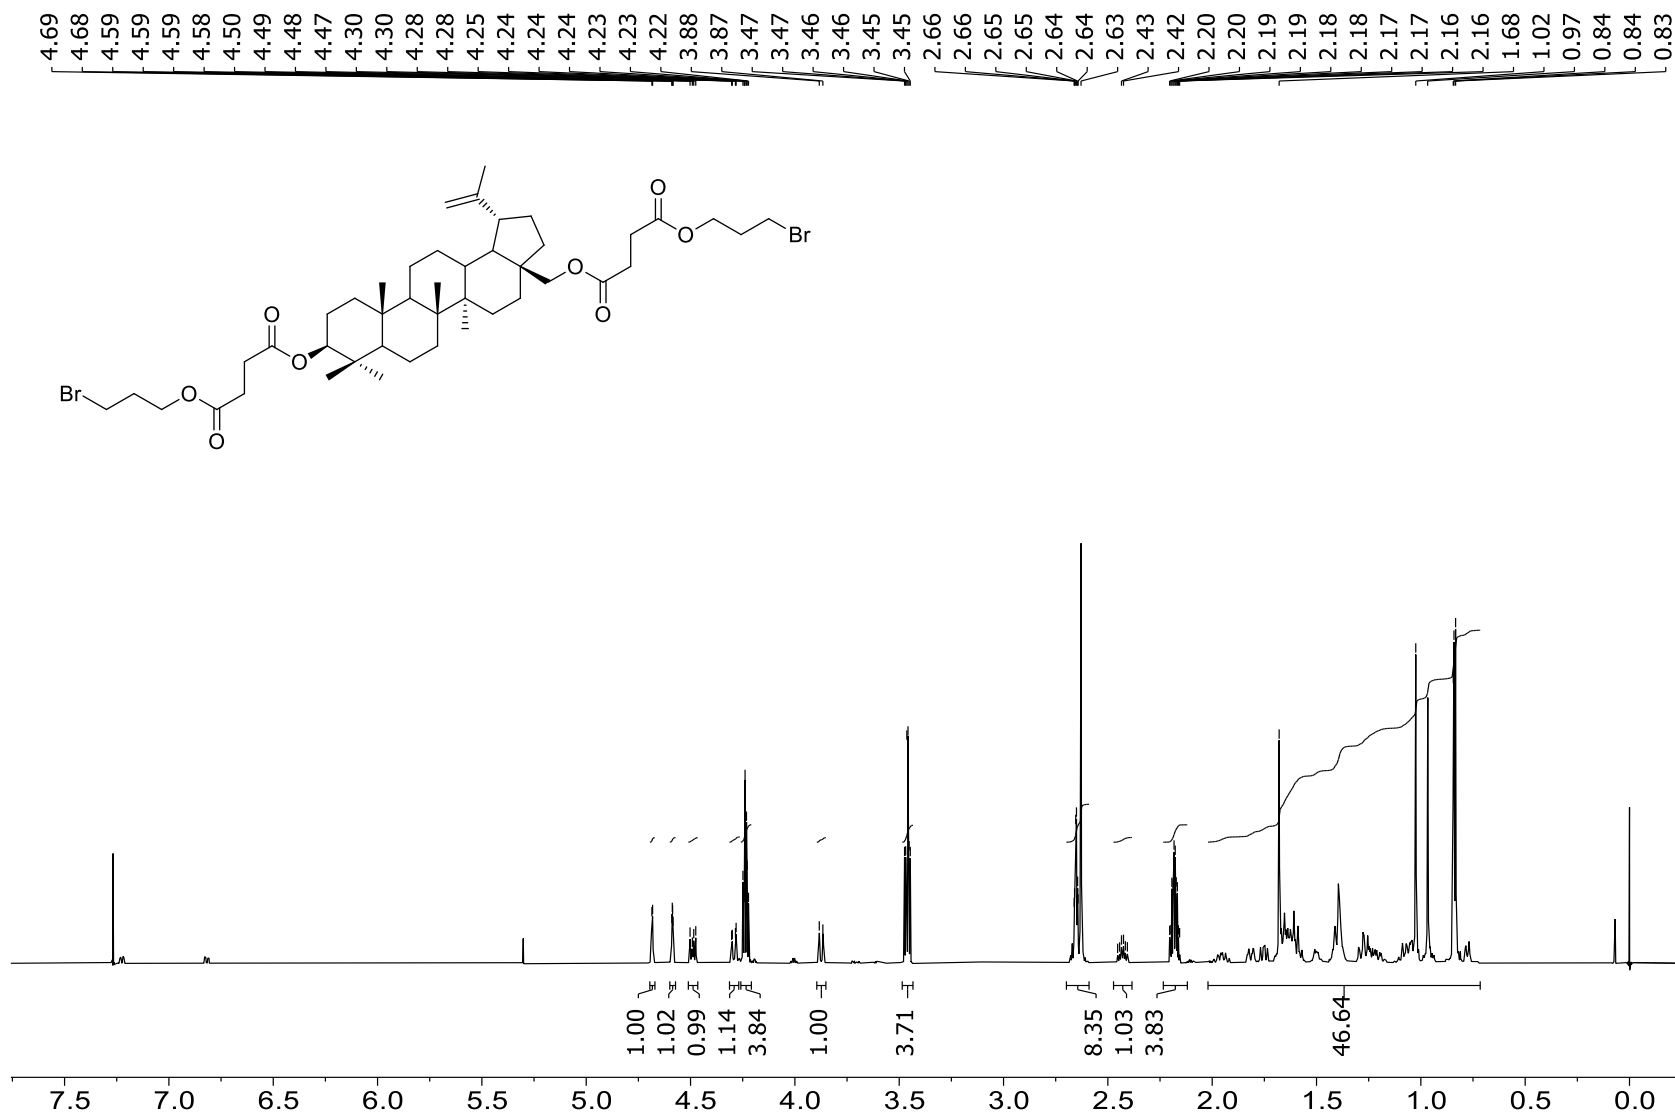

<sup>1</sup>H NMR spectrum of analogue **8a**; 600 MHz/CDCl<sub>3</sub>/TMS;  $\delta$  (ppm).

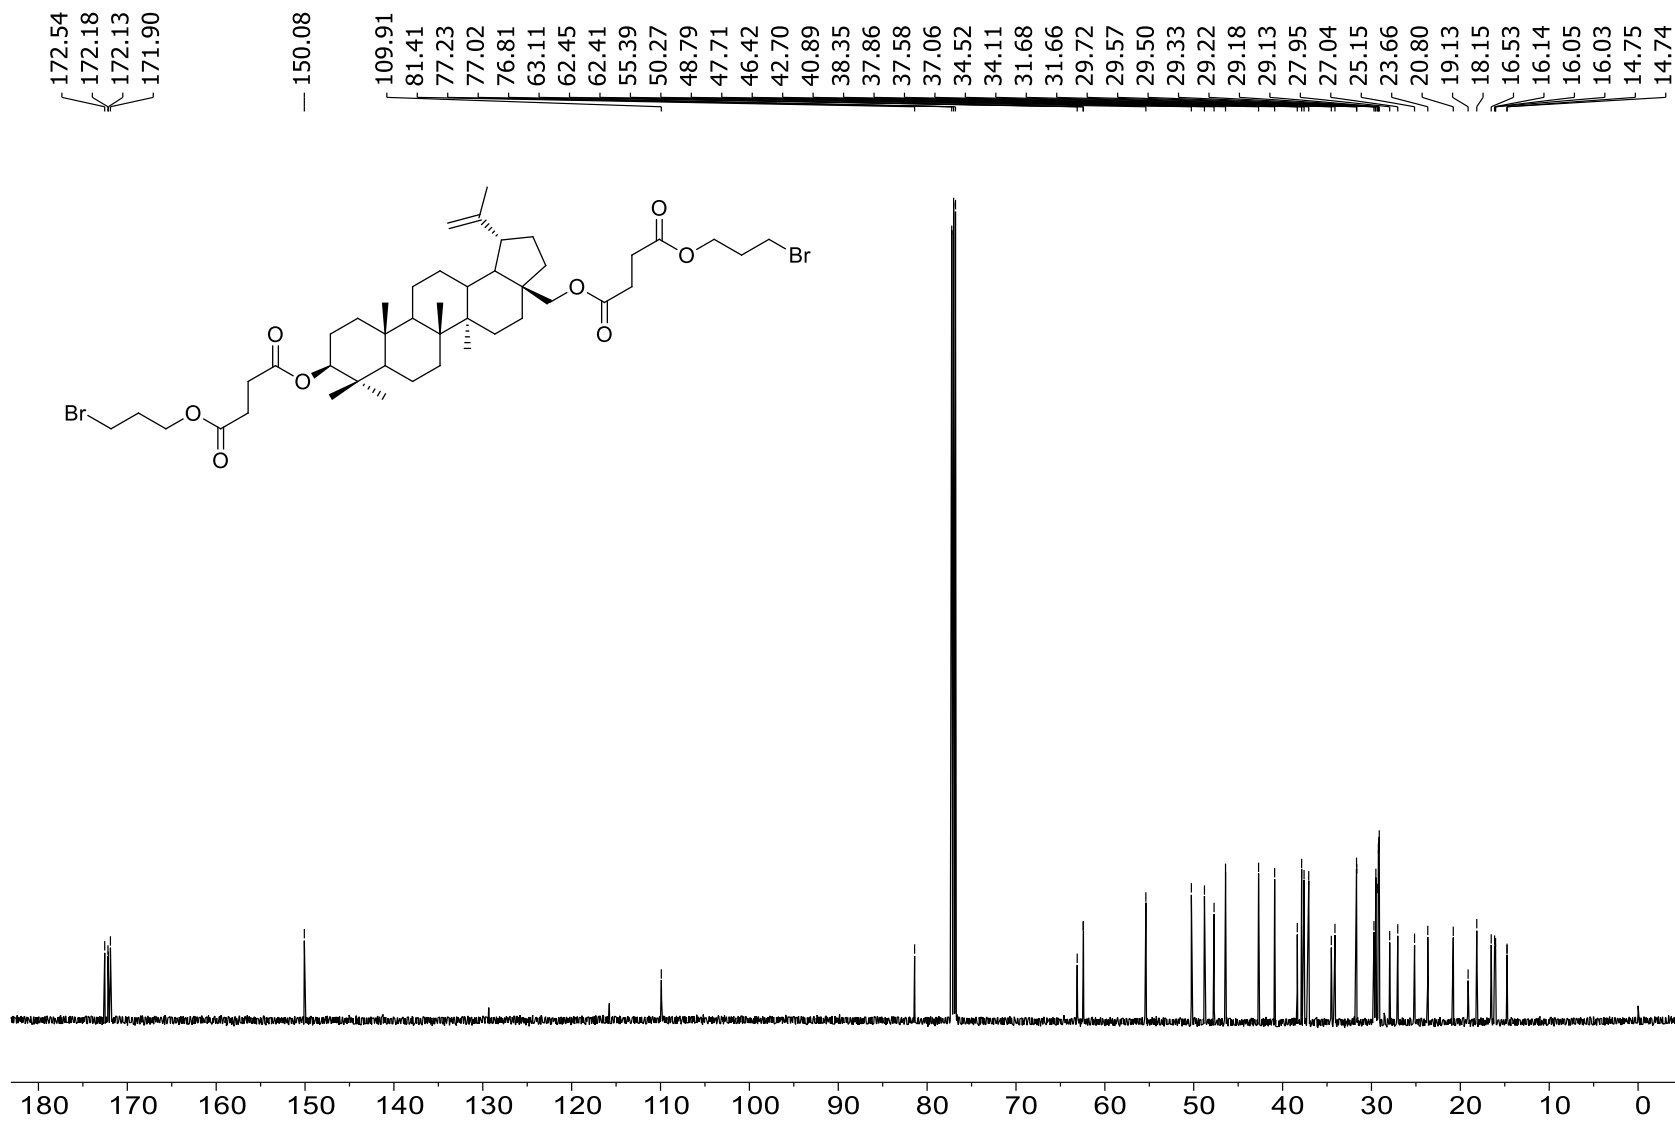

<sup>13</sup>C NMR spectrum of analogue **8a**; 150 MHz/CDCl<sub>3</sub>/TMS;  $\delta$  (ppm).

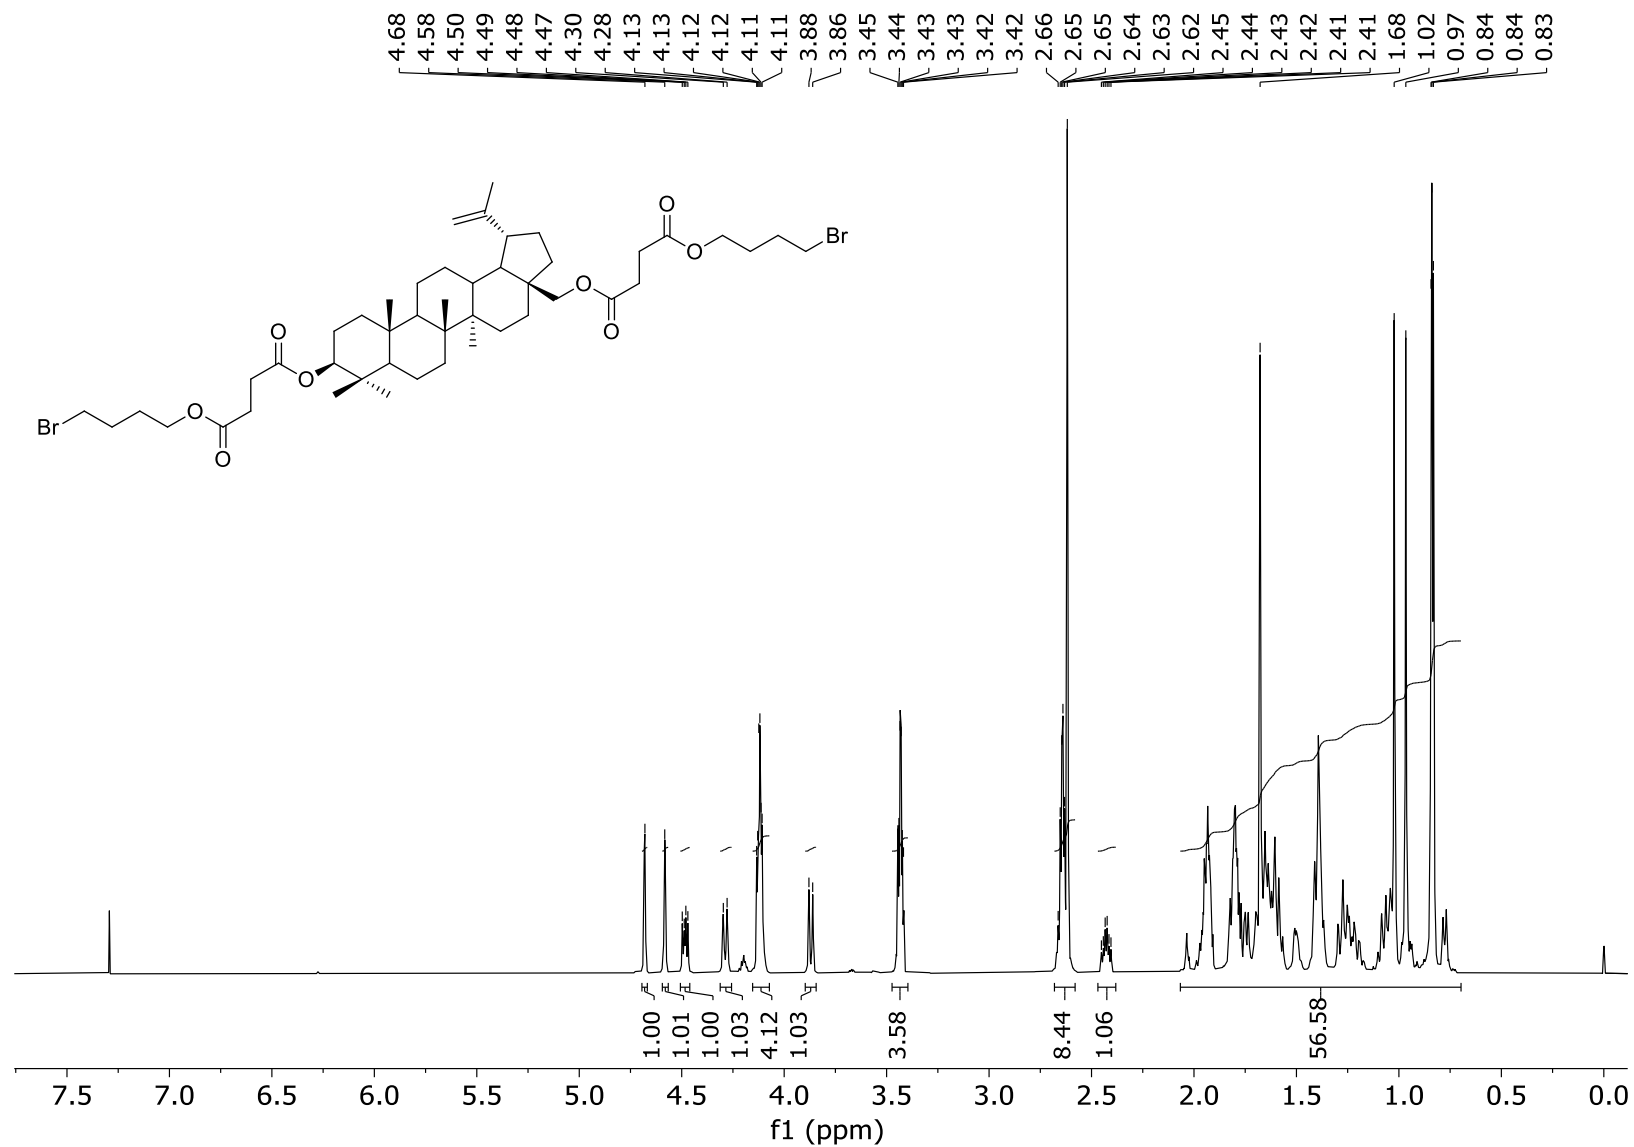

<sup>1</sup>H NMR spectrum of analogue **8b**; 600 MHz/CDCl<sub>3</sub>/TMS; δ (ppm).

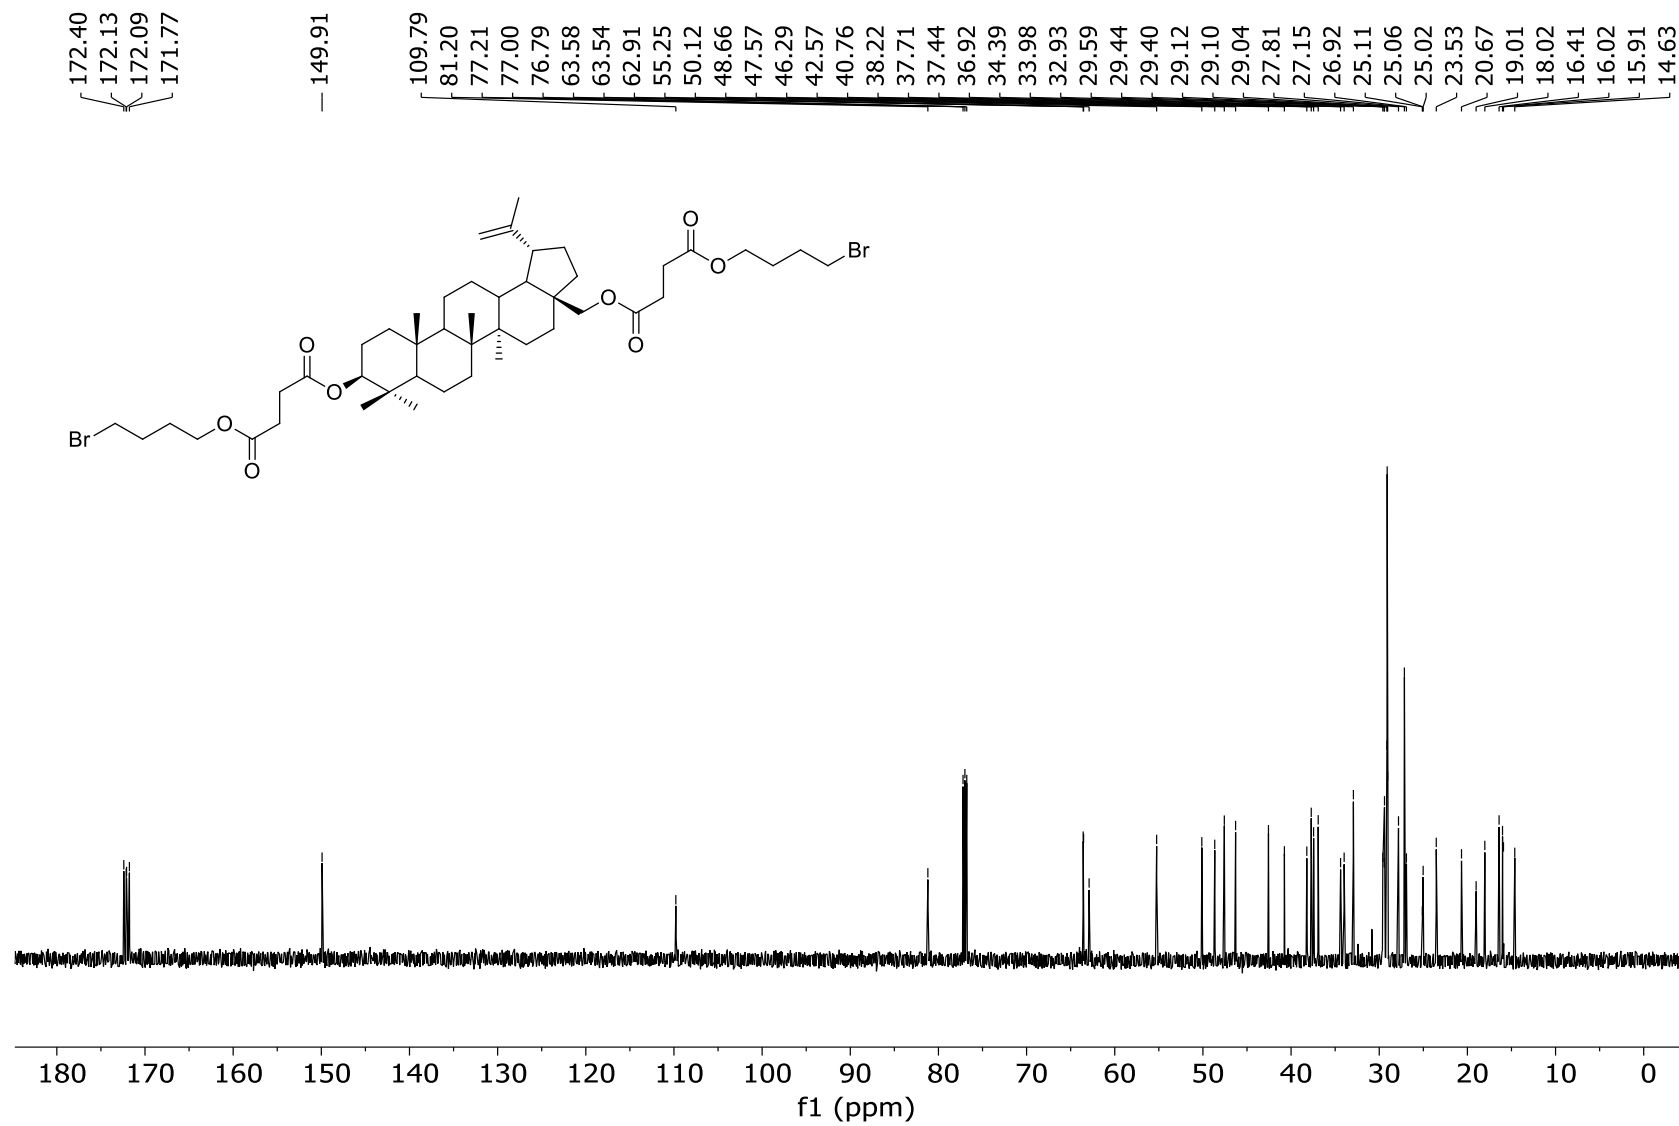

<sup>13</sup>C NMR spectrum of analogue **8b**; 150 MHz/CDCl<sub>3</sub>/TMS;  $\delta$  (ppm).

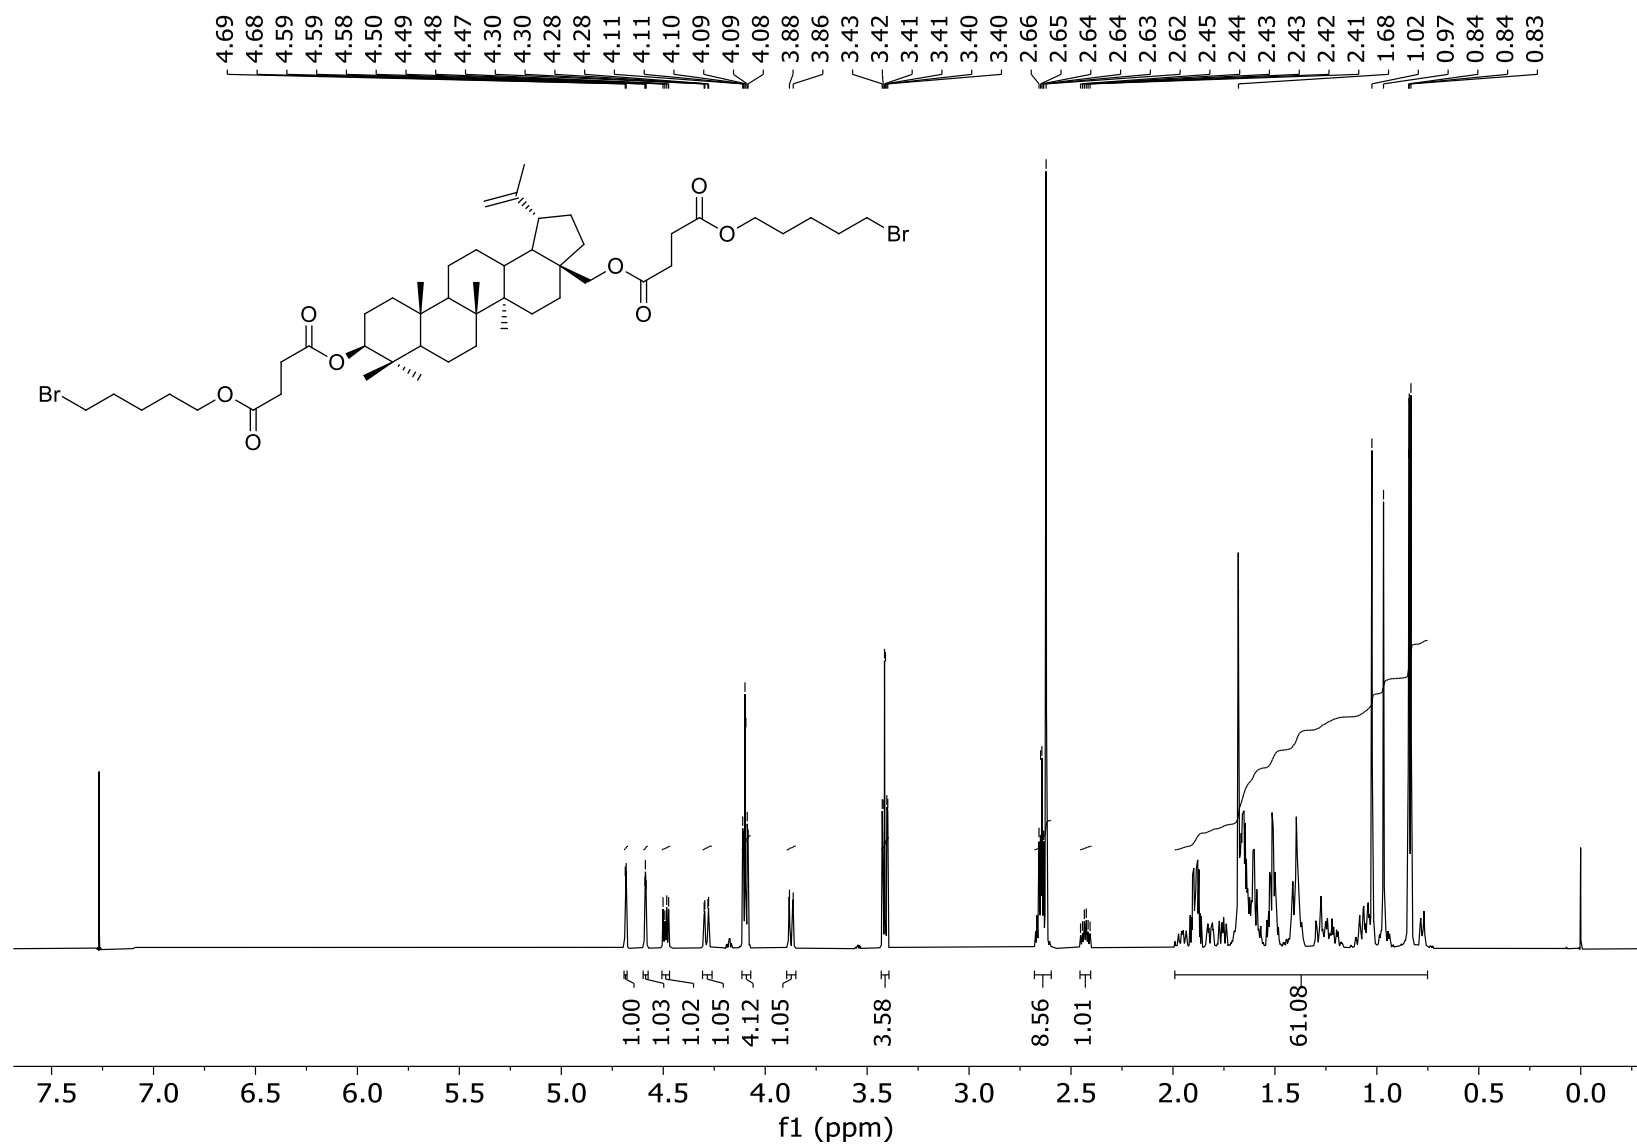

<sup>1</sup>H NMR spectrum of analogue **8c**; 600 MHz/CDCl<sub>3</sub>/TMS; δ (ppm).

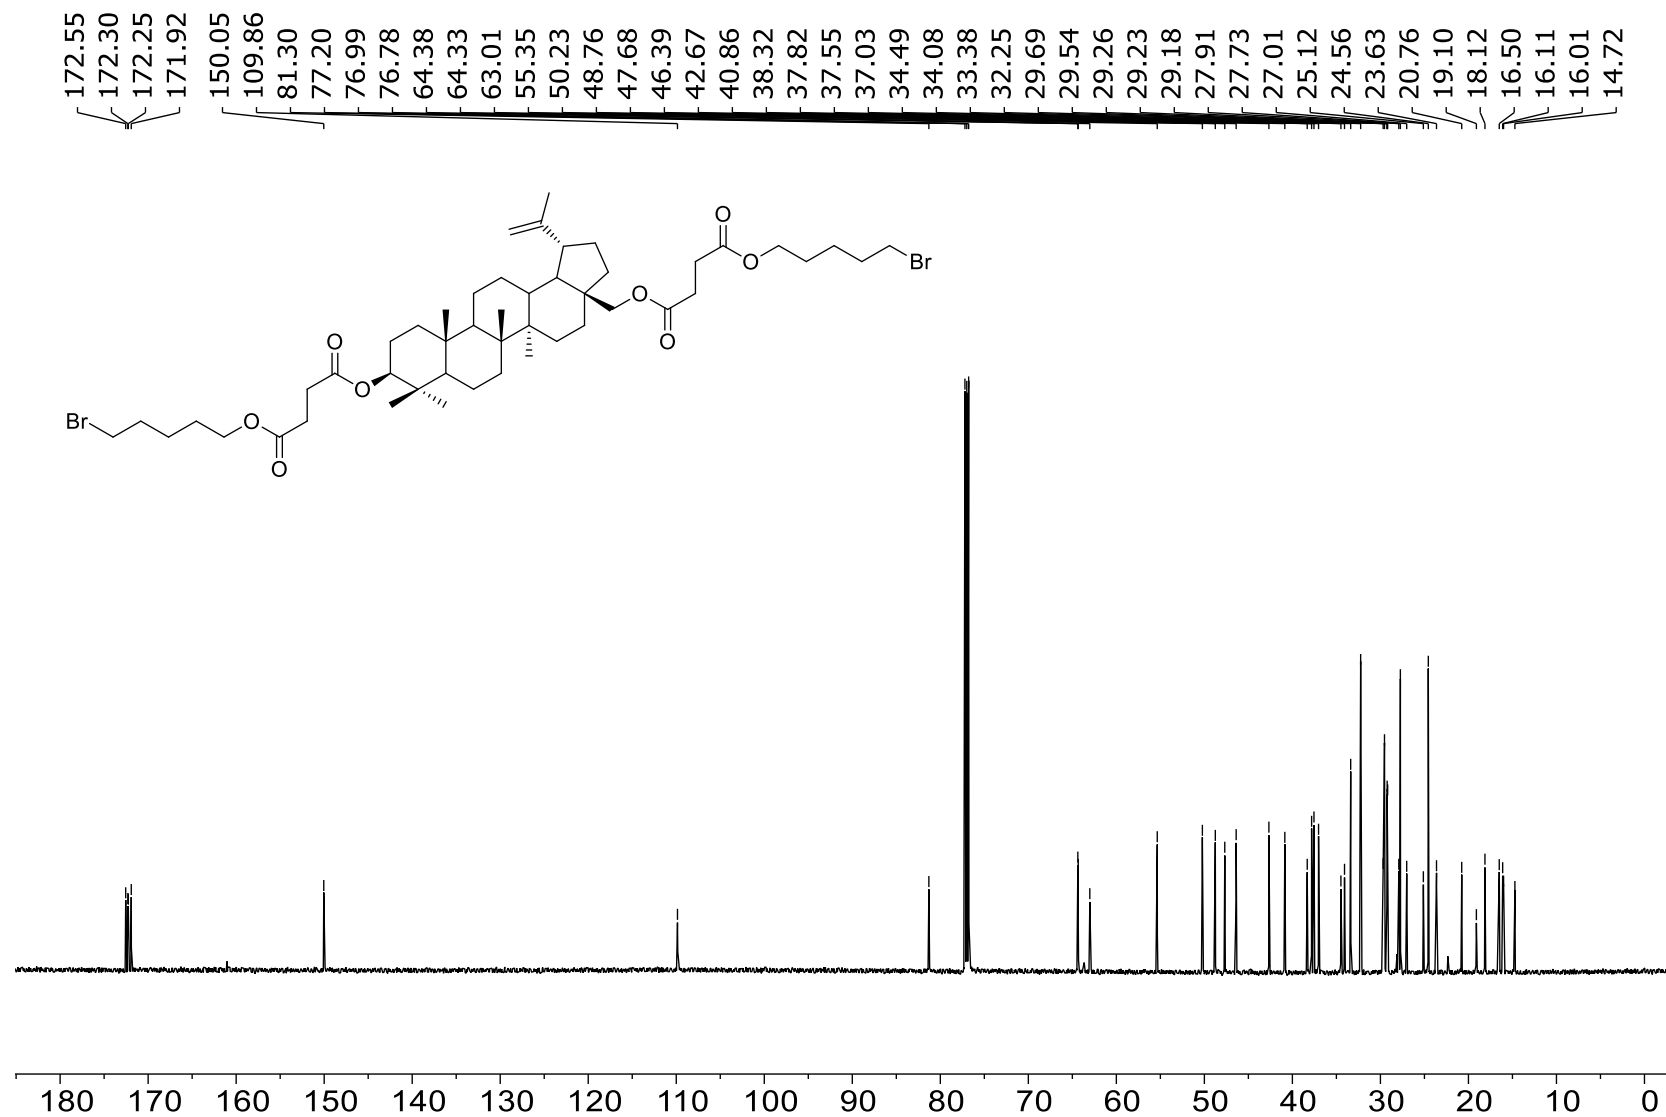

<sup>13</sup>C NMR spectrum of analogue **8c**; 150 MHz/CDCl<sub>3</sub>/TMS;  $\delta$  (ppm).







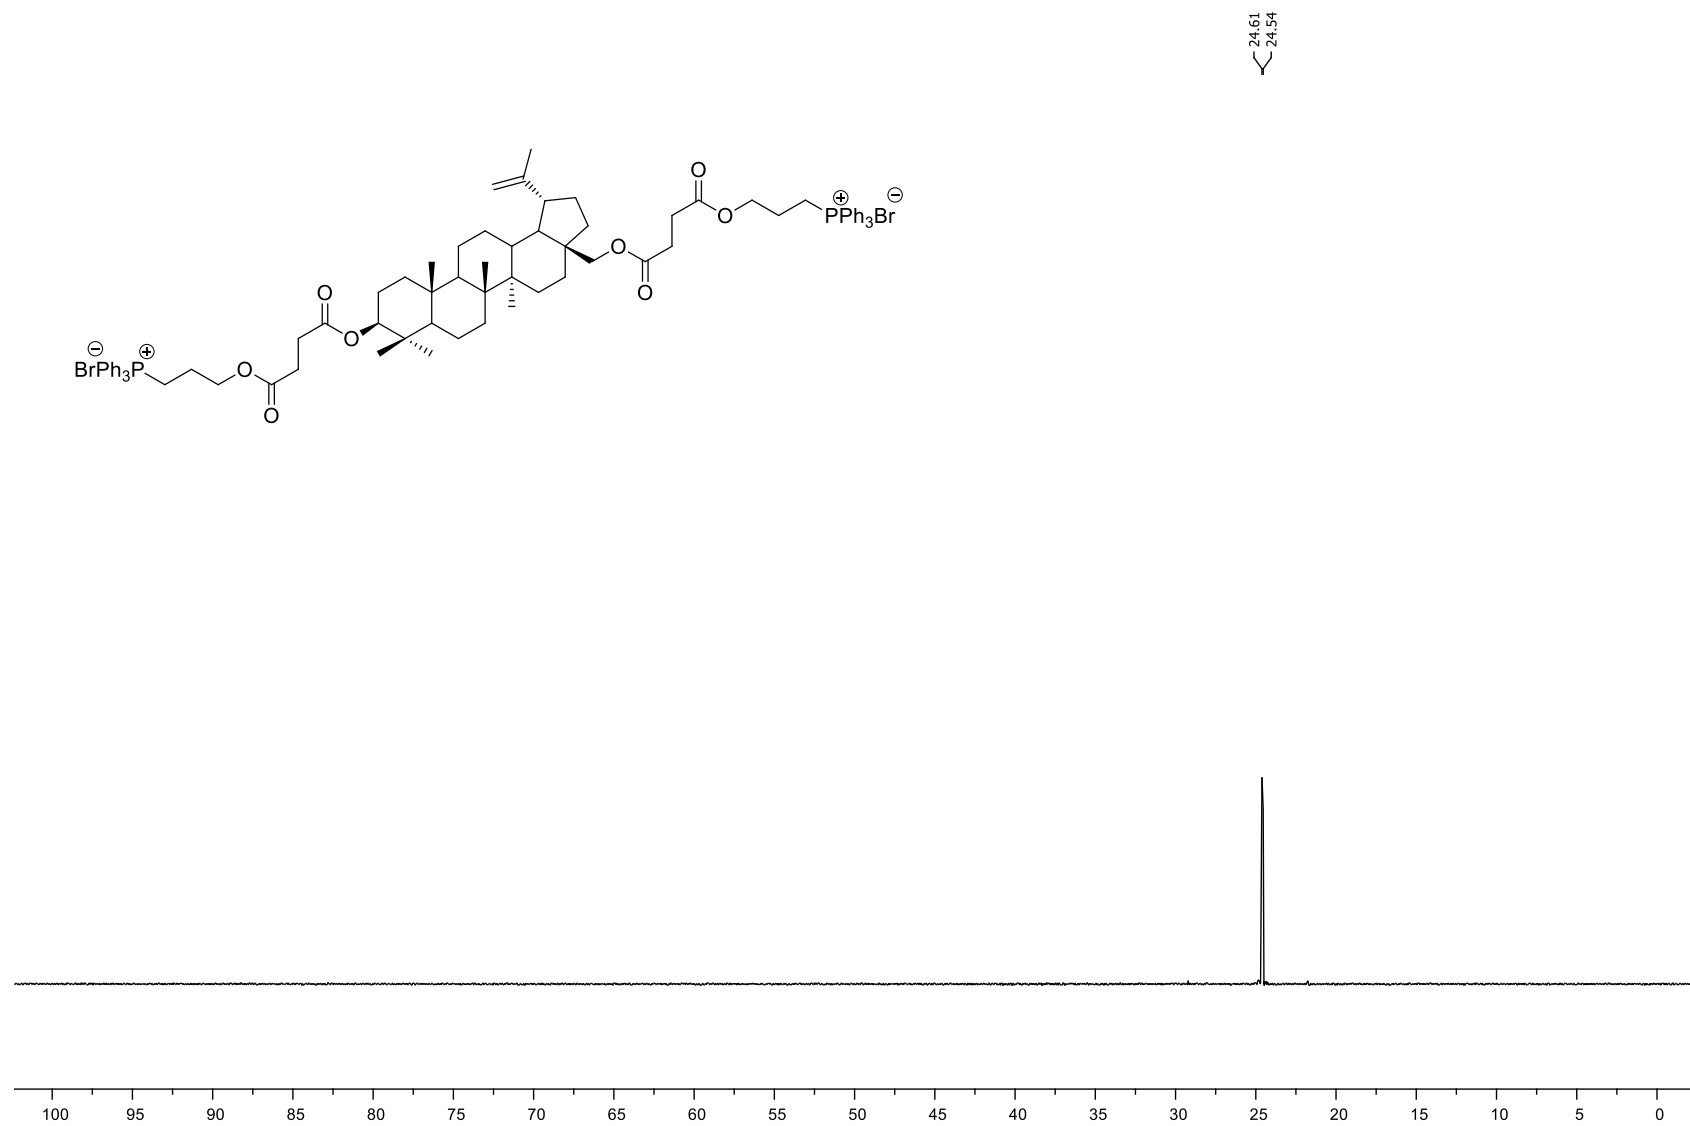

$^{31}\text{P}$  NMR spectrum of analogue **9a**; 161.9 MHz/ $\text{CDCl}_3$ /TMS;  $\delta$  (ppm).

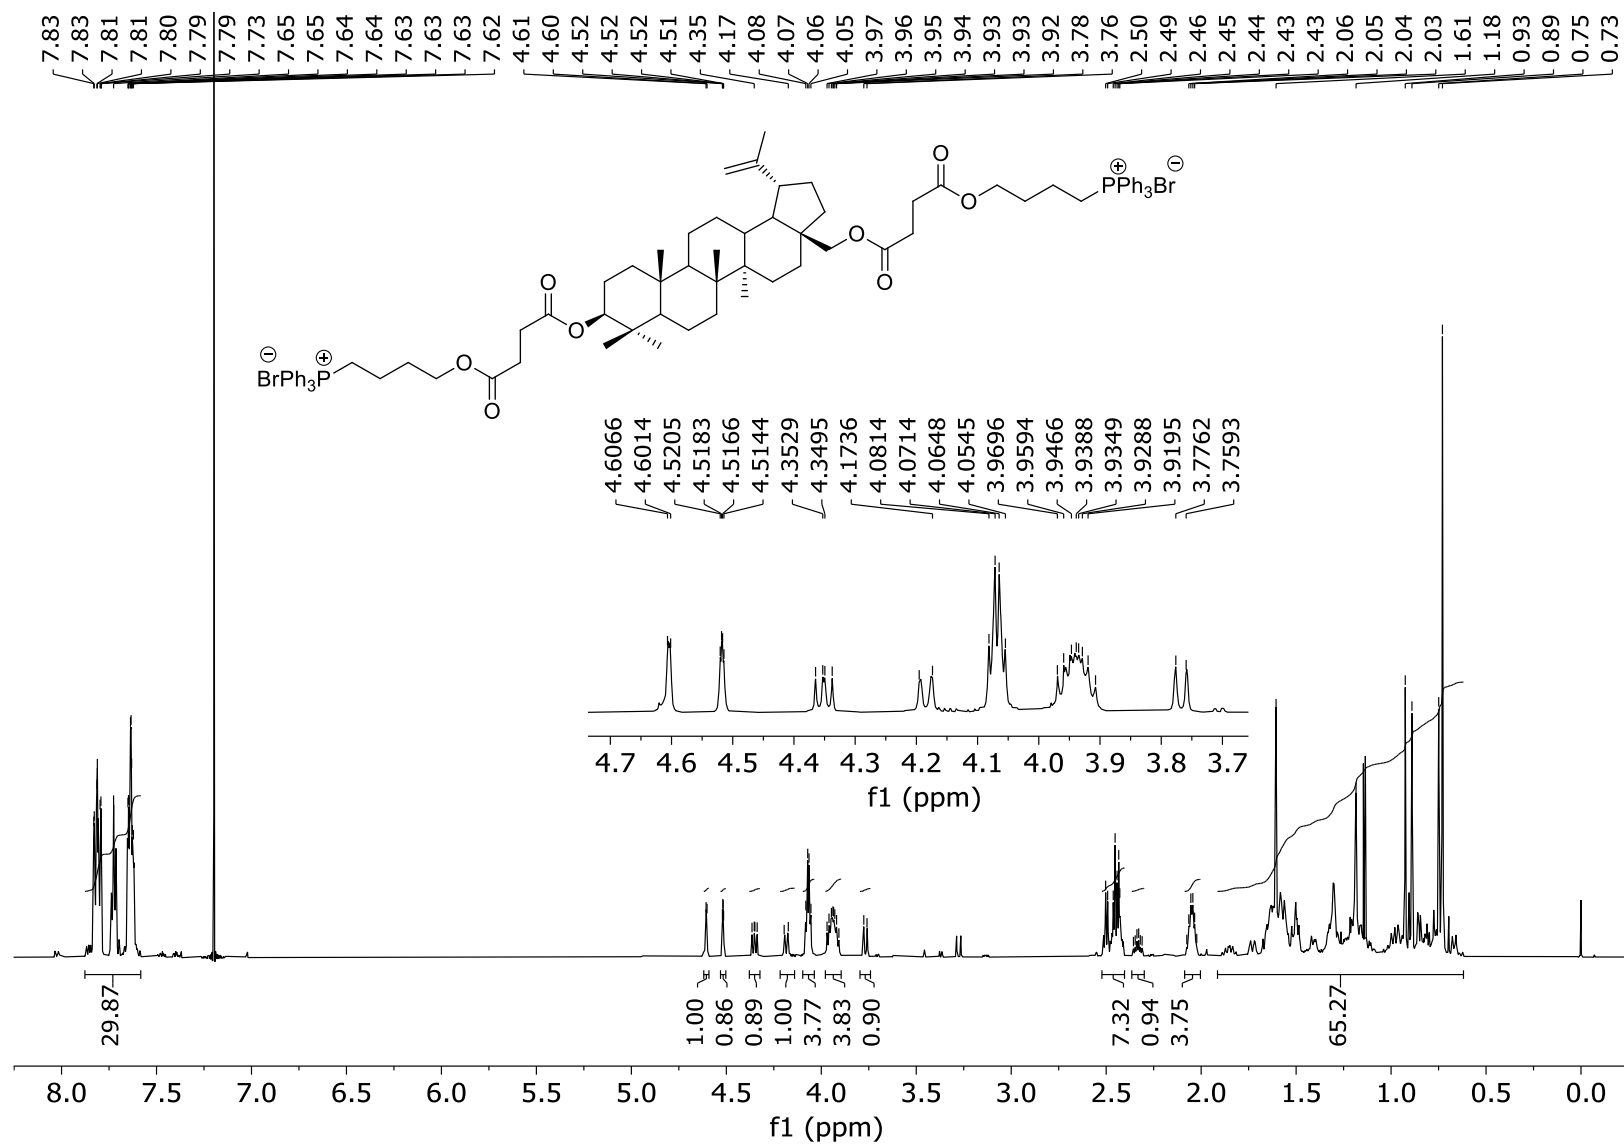

<sup>1</sup>H NMR spectrum of analogue **9b**; 600 MHz/CDCl<sub>3</sub>/TMS; δ (ppm).

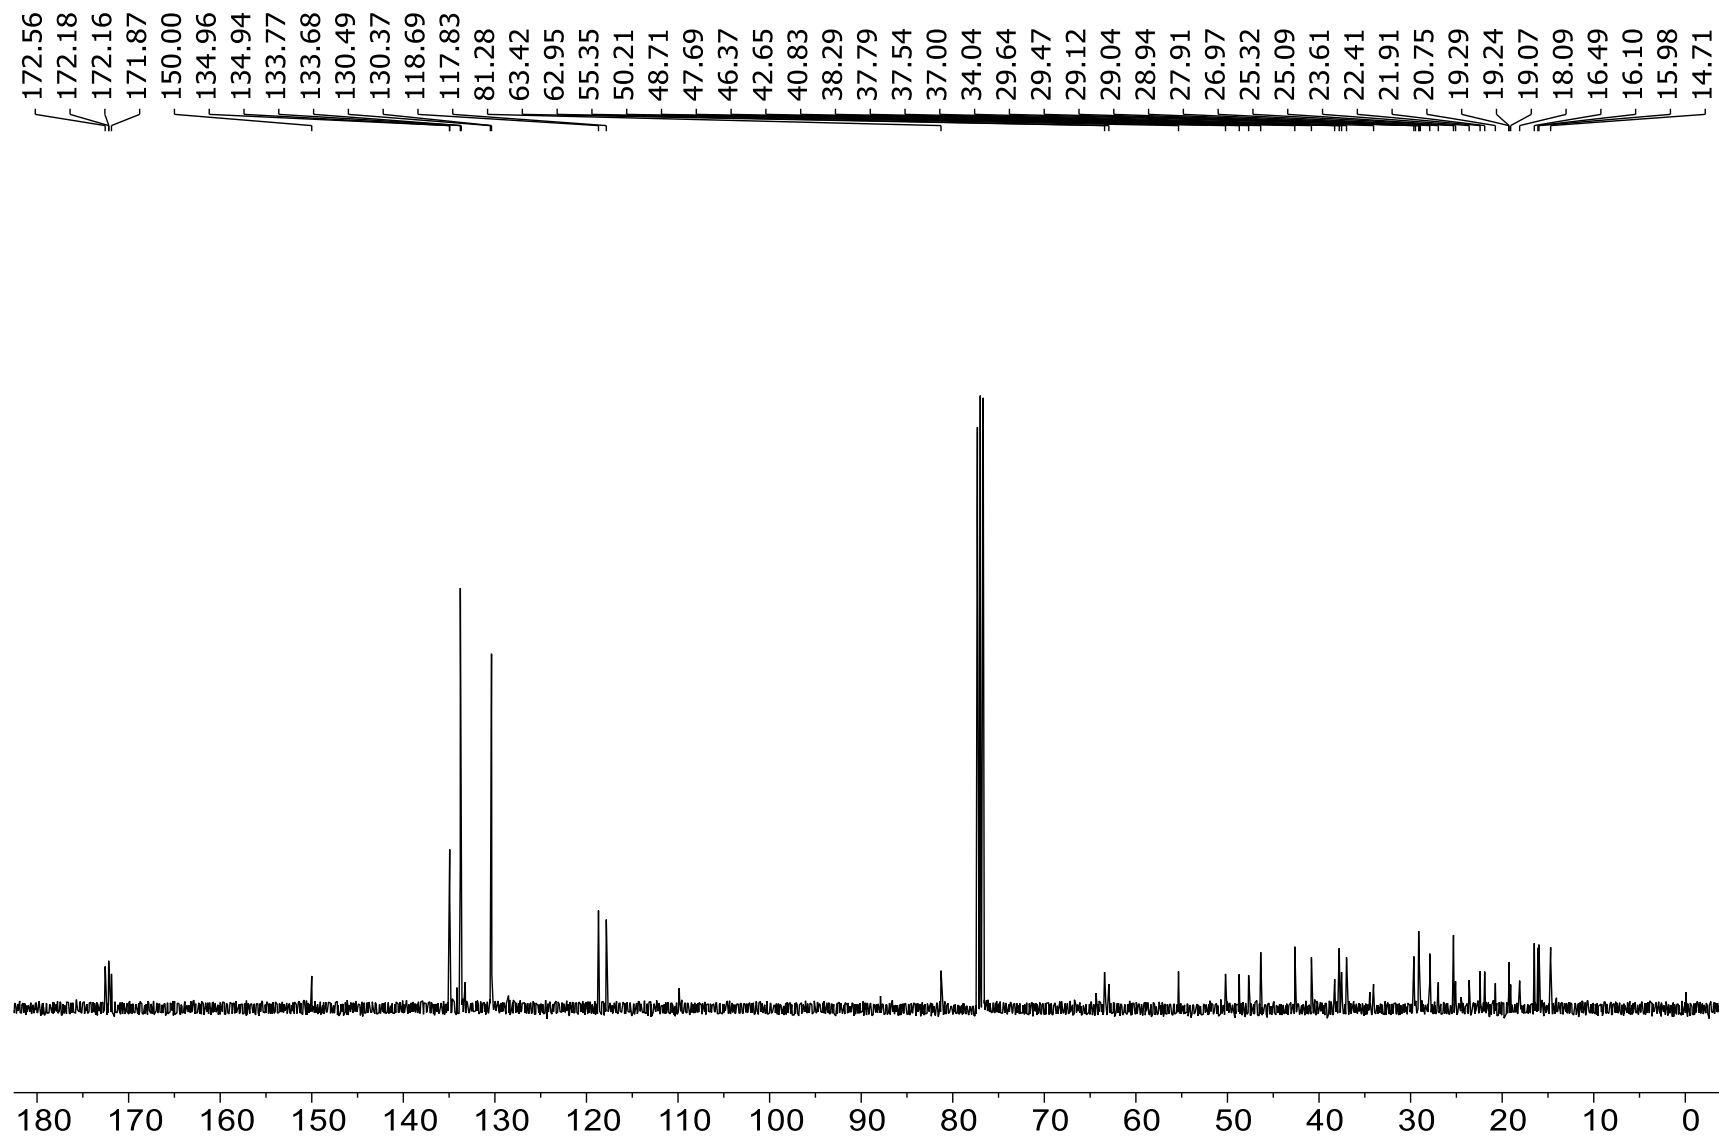

$^{13}\text{C}$  NMR spectrum of analogue **9b**; 100 MHz/ $\text{CDCl}_3$ /TMS;  $\delta$  (ppm).

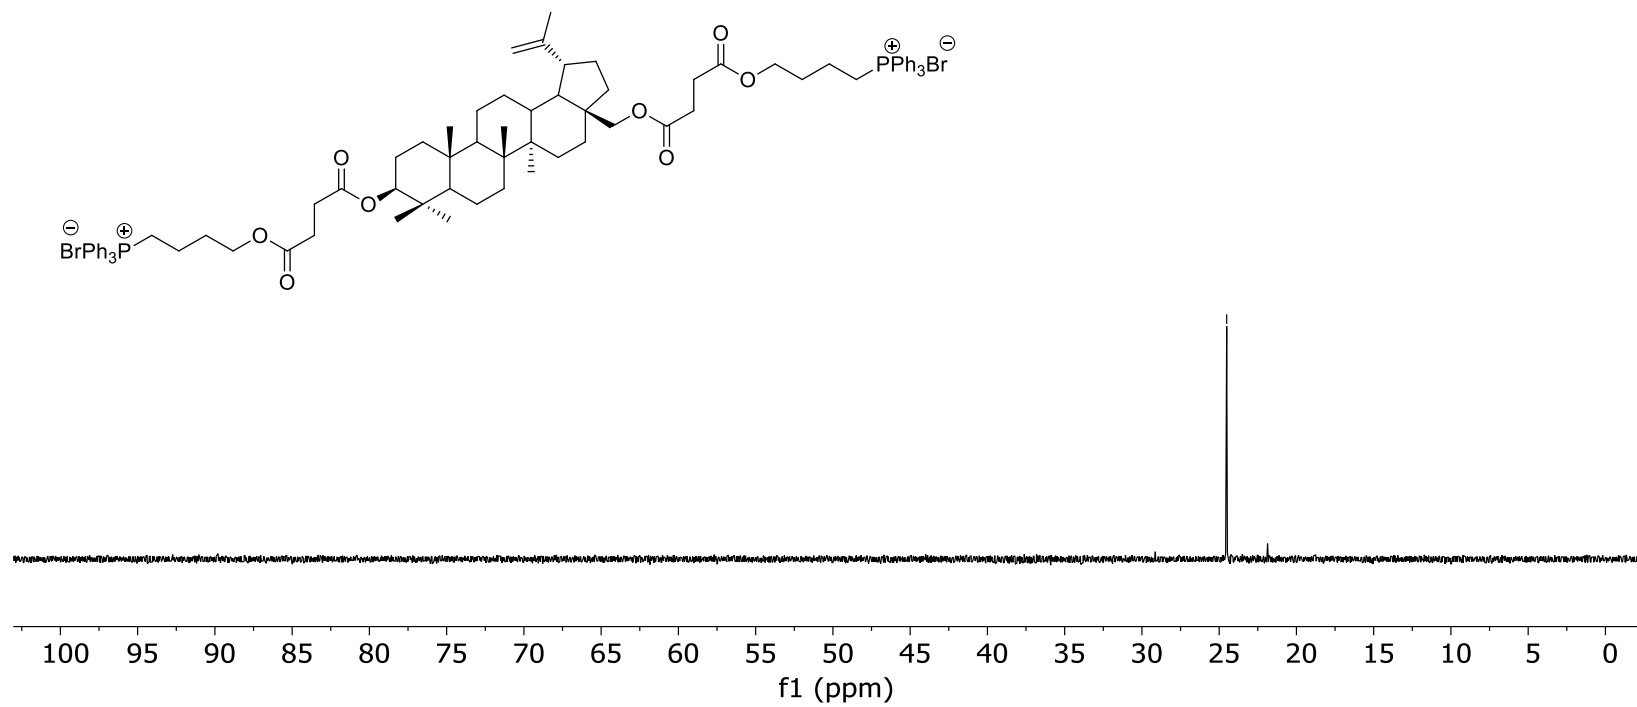

— 24.51

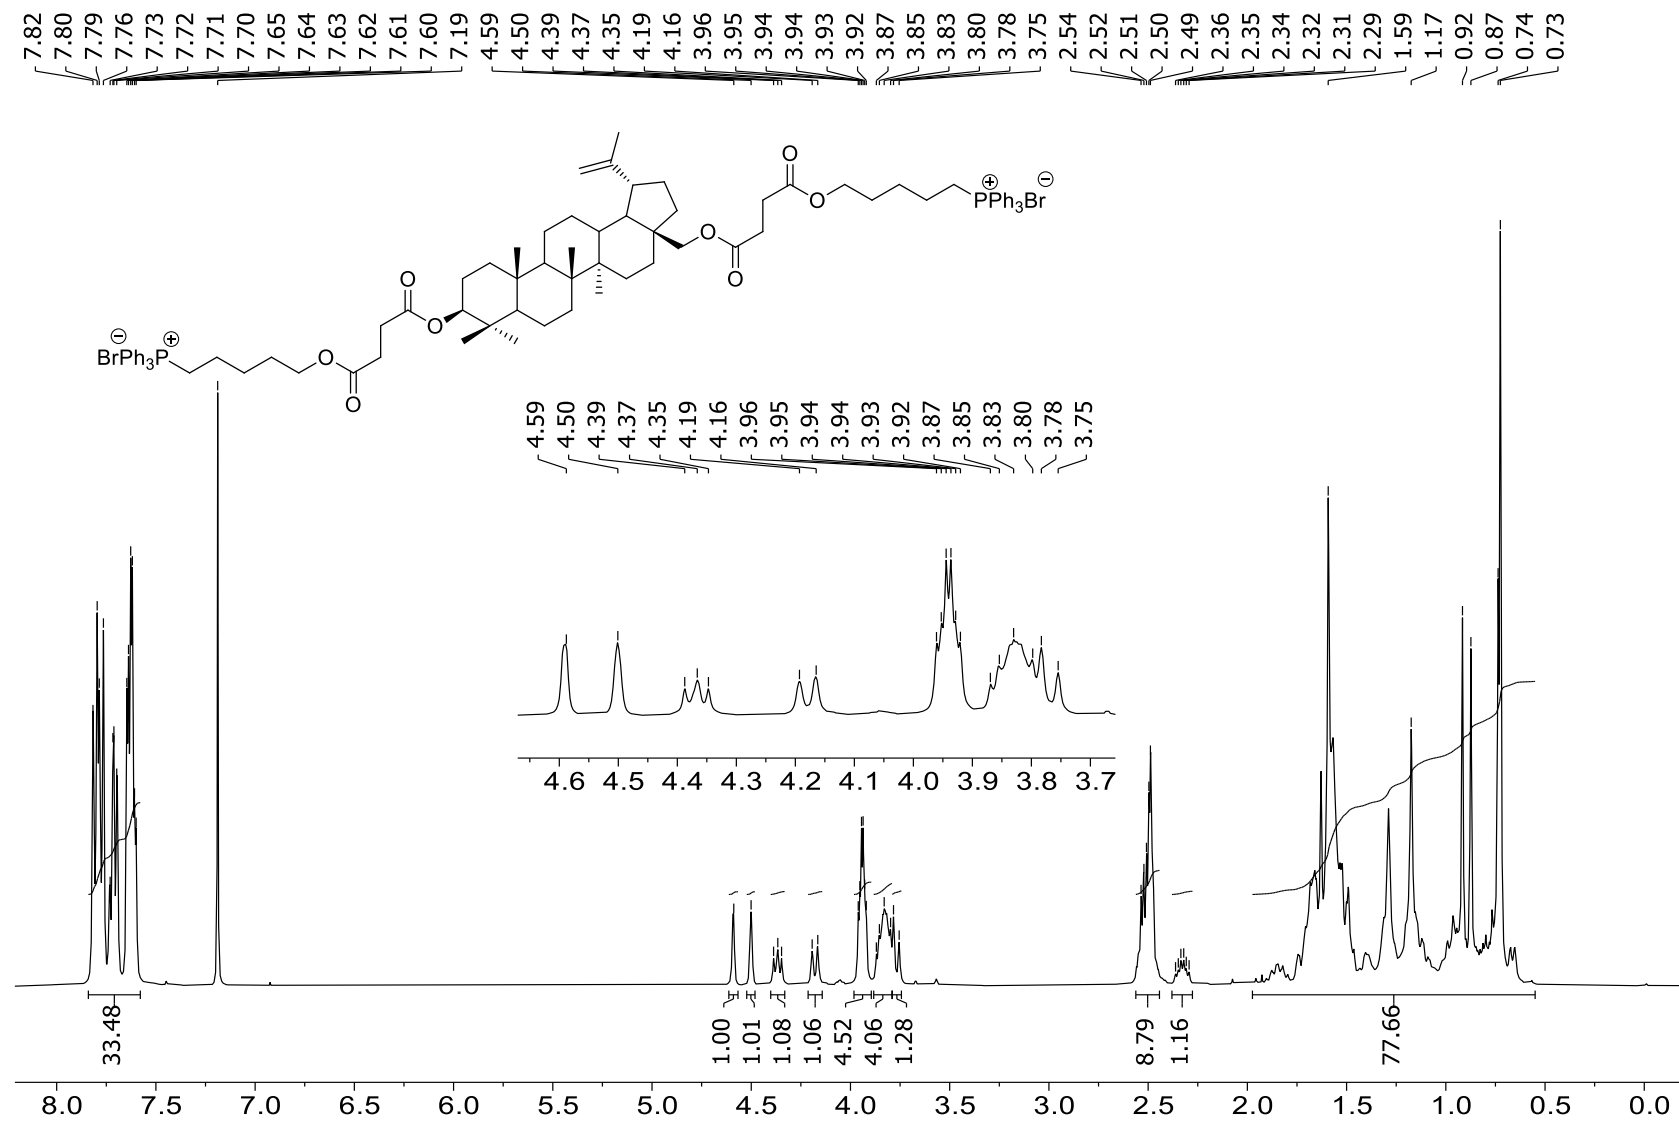

<sup>1</sup>H NMR spectrum of analogue **9c**; 400 MHz/CDCl<sub>3</sub>/TMS; δ (ppm).





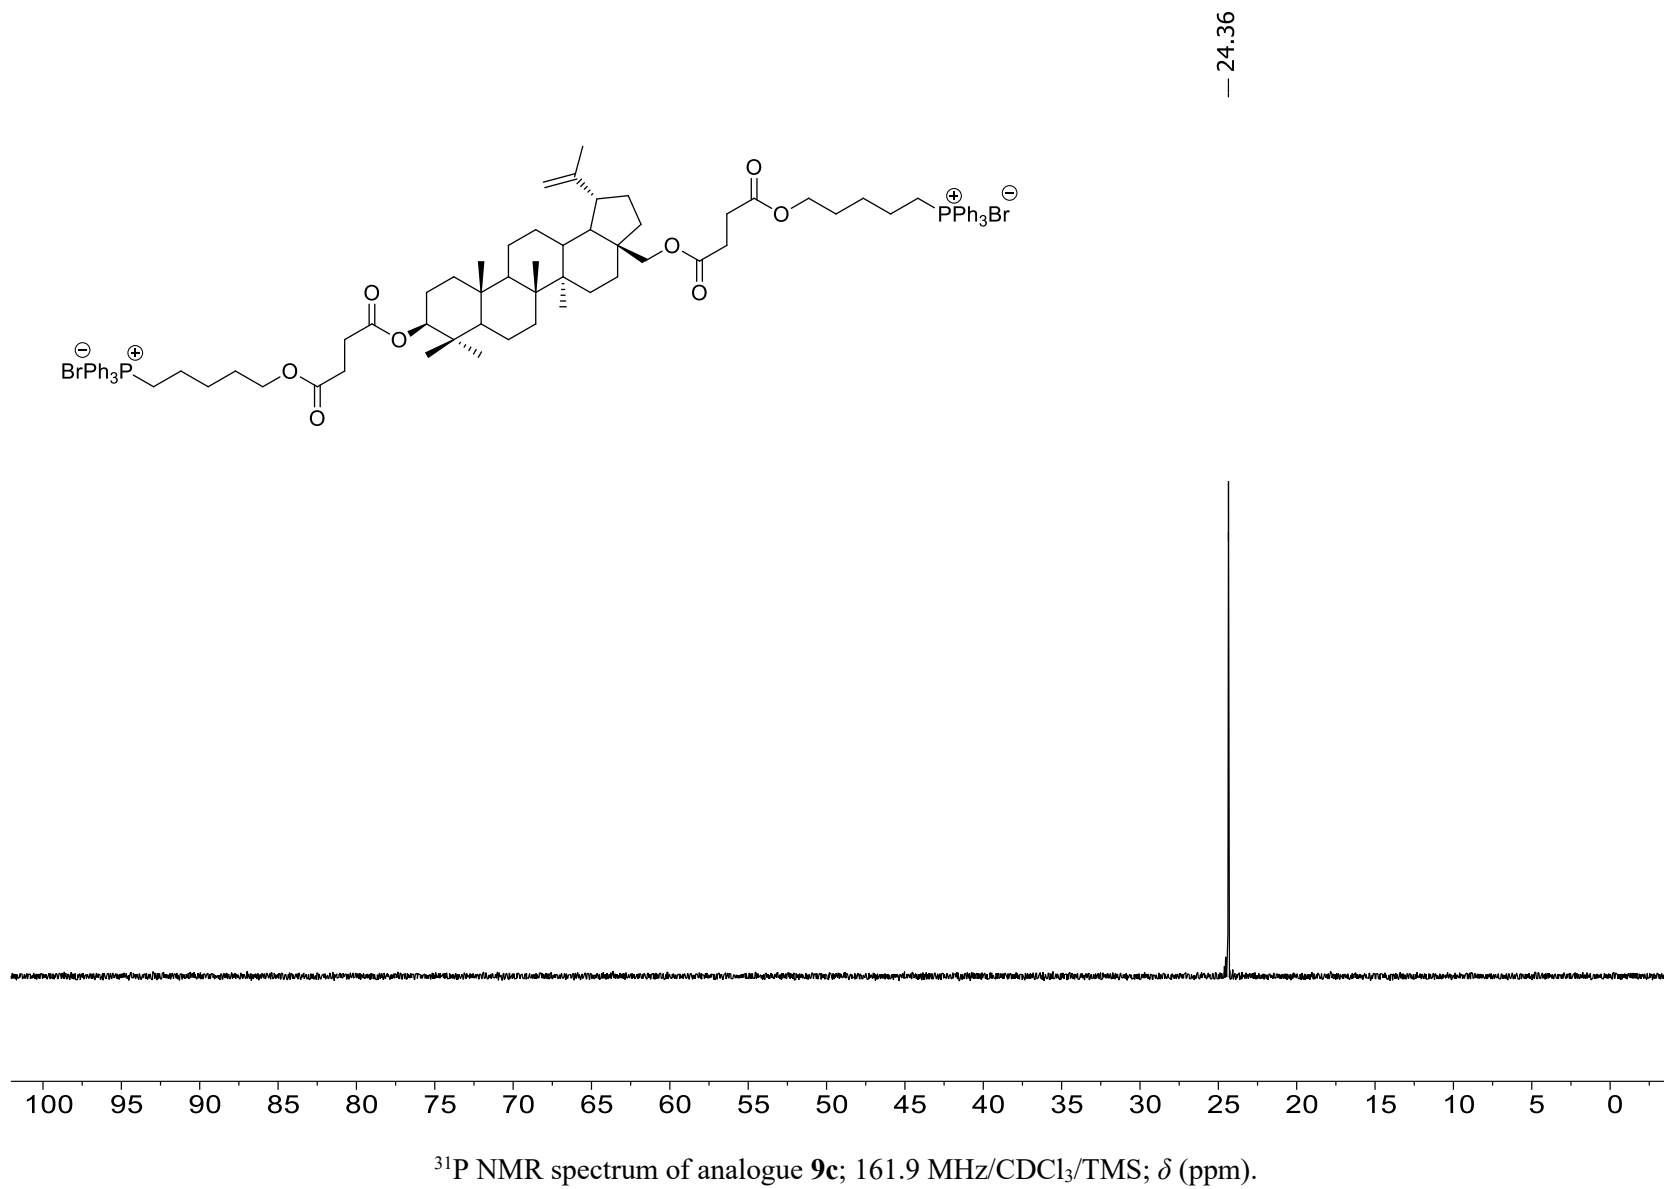

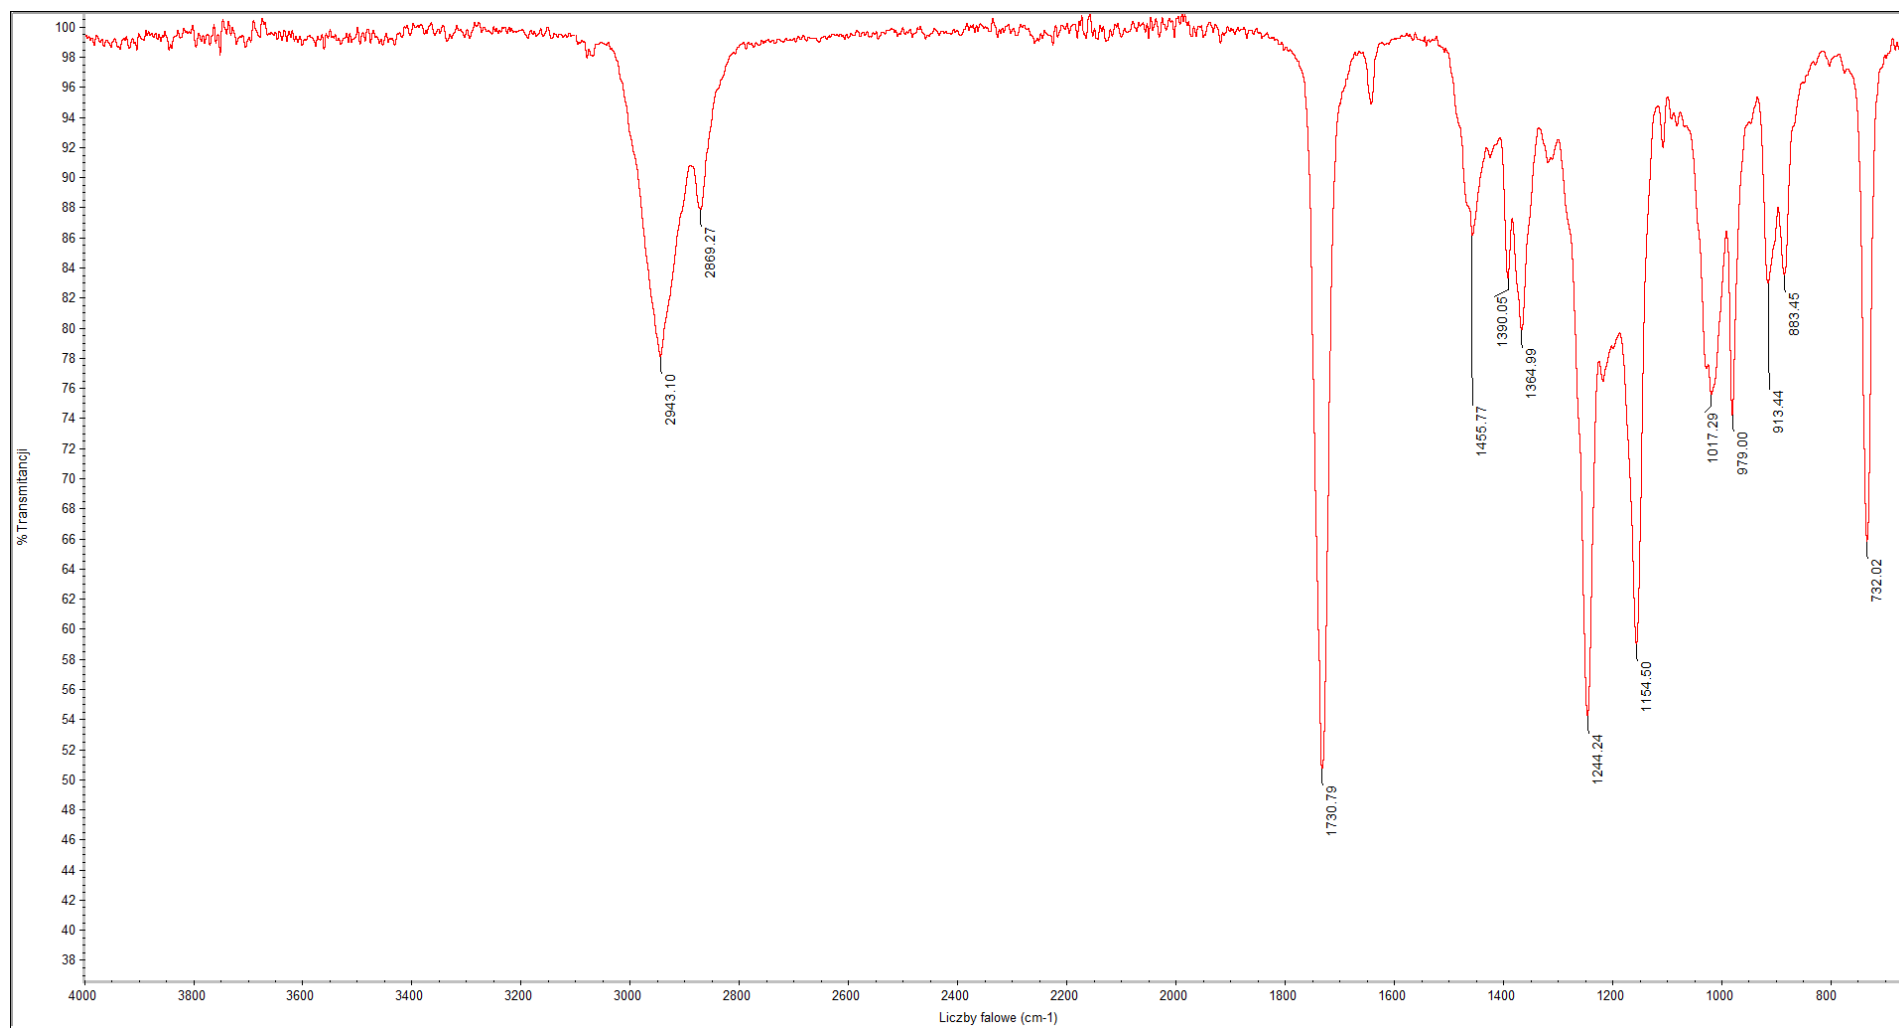

IR spectrum of product **6a**; ATR (cm<sup>-1</sup>).

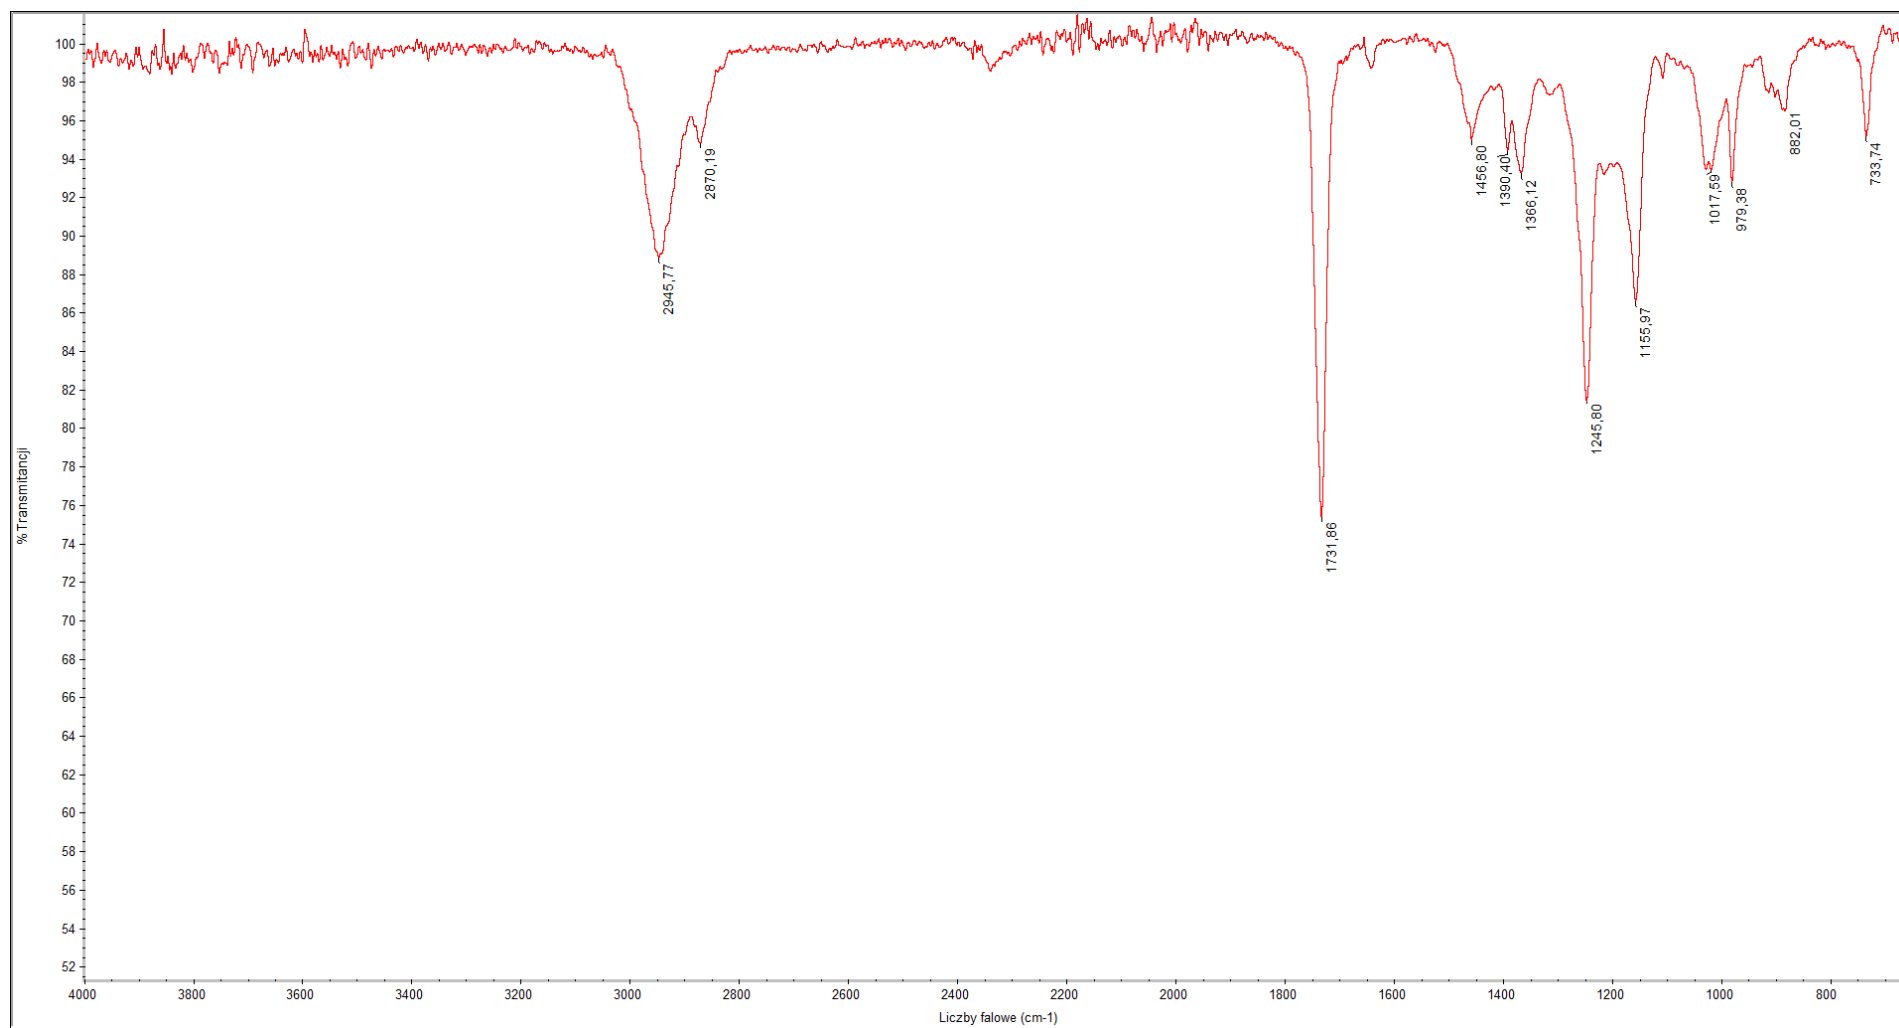

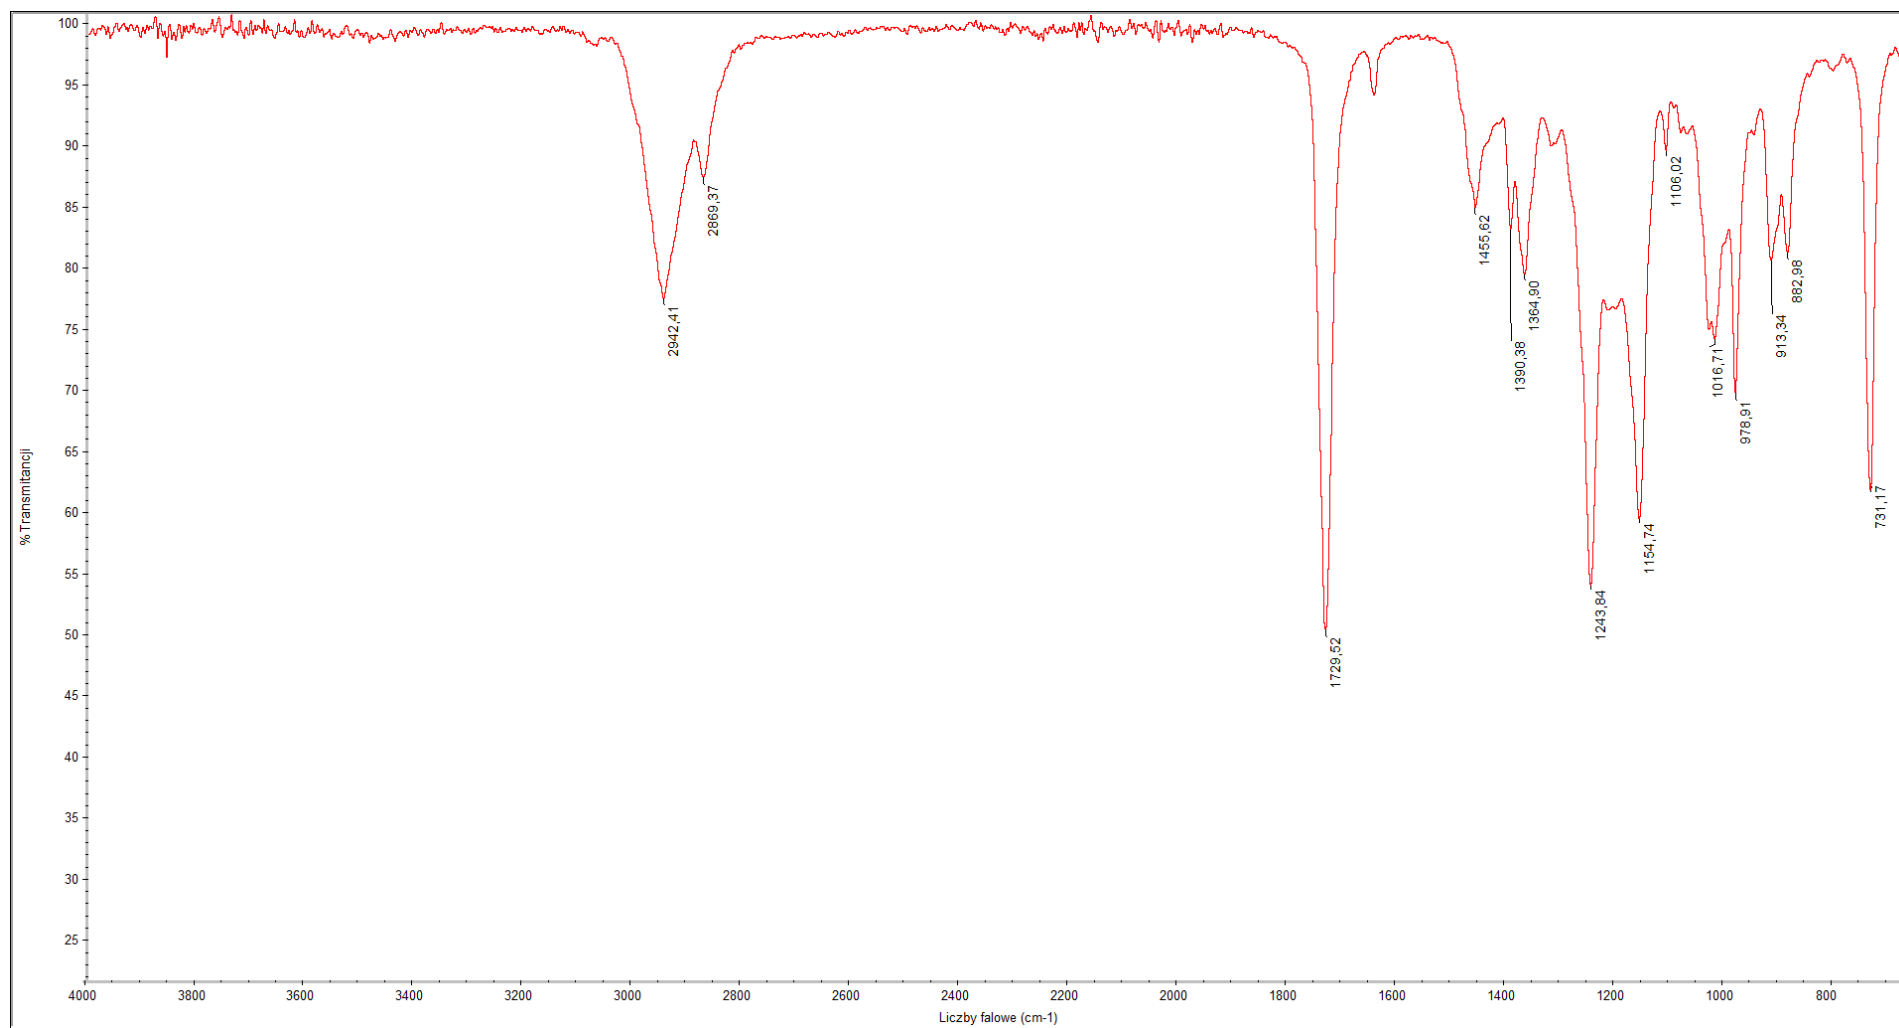

IR spectrum of product 6c; ATR (cm<sup>-1</sup>).

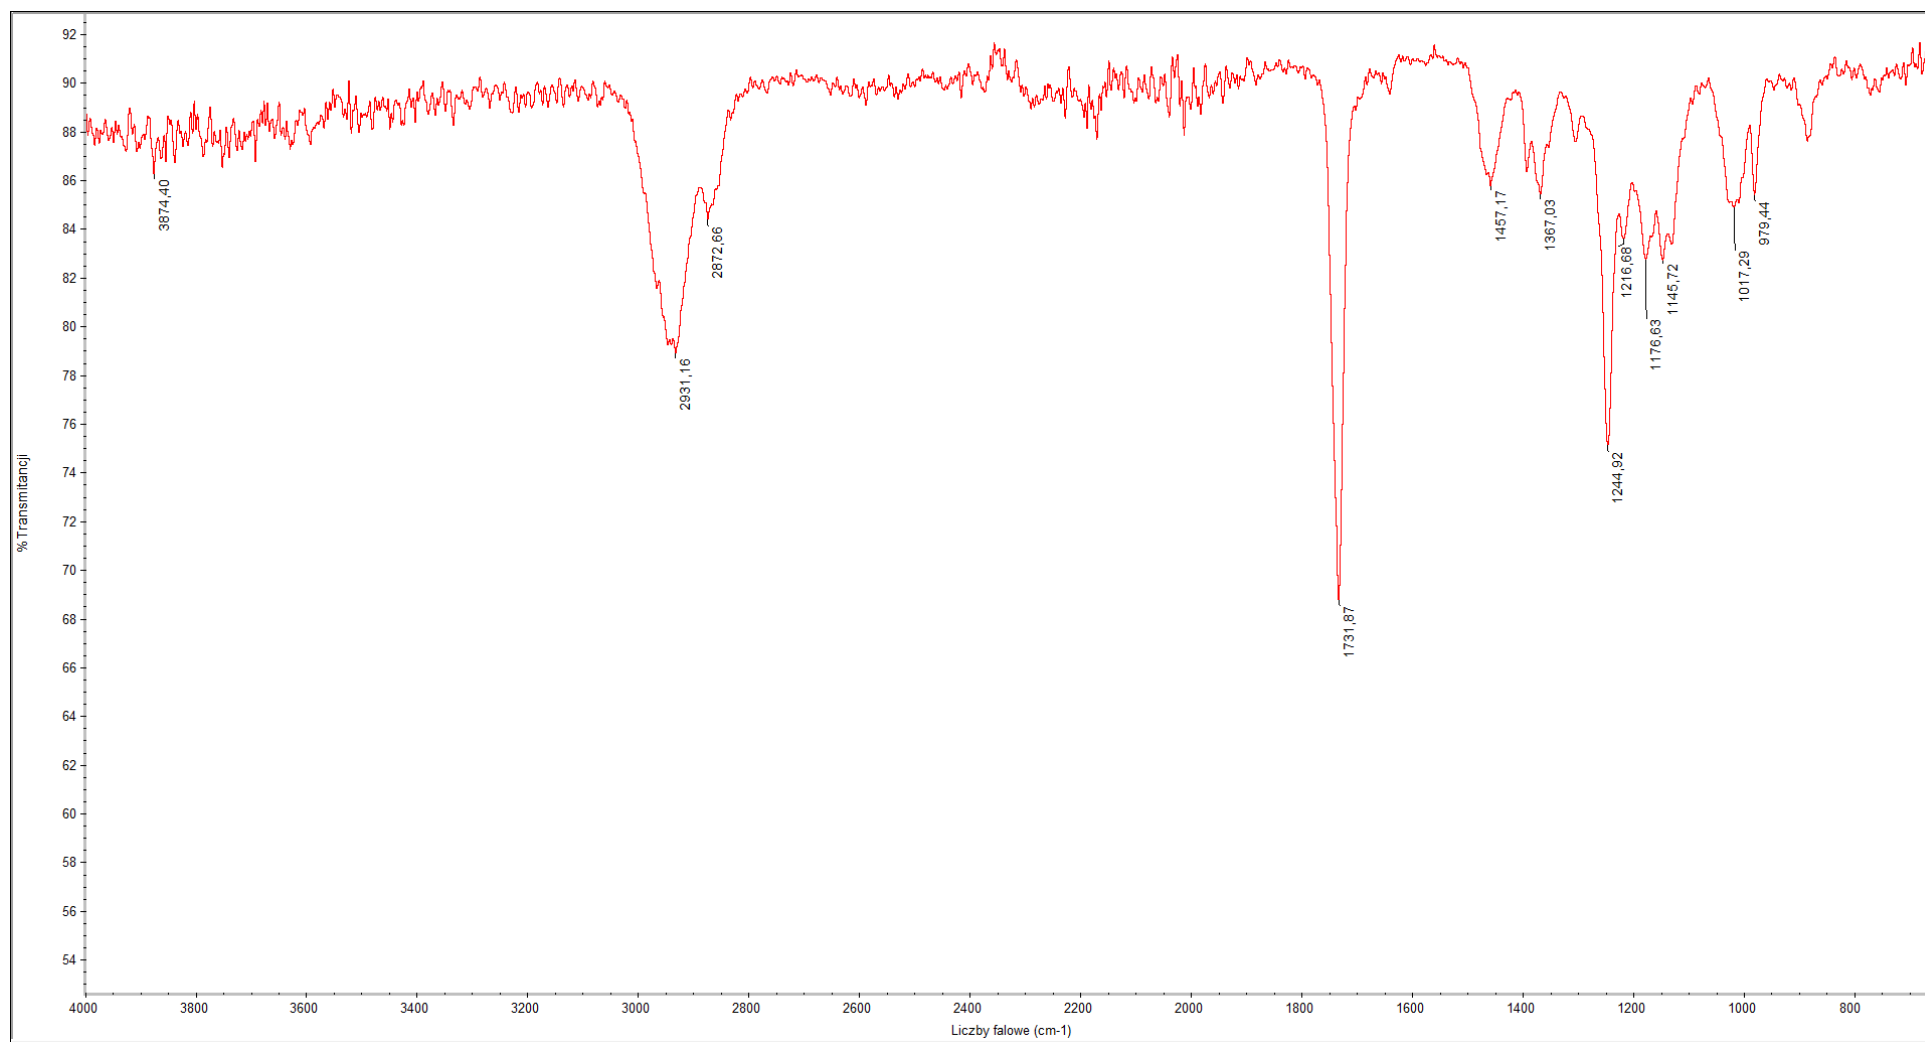

IR spectrum of product **6d**; ATR ( $\text{cm}^{-1}$ ).

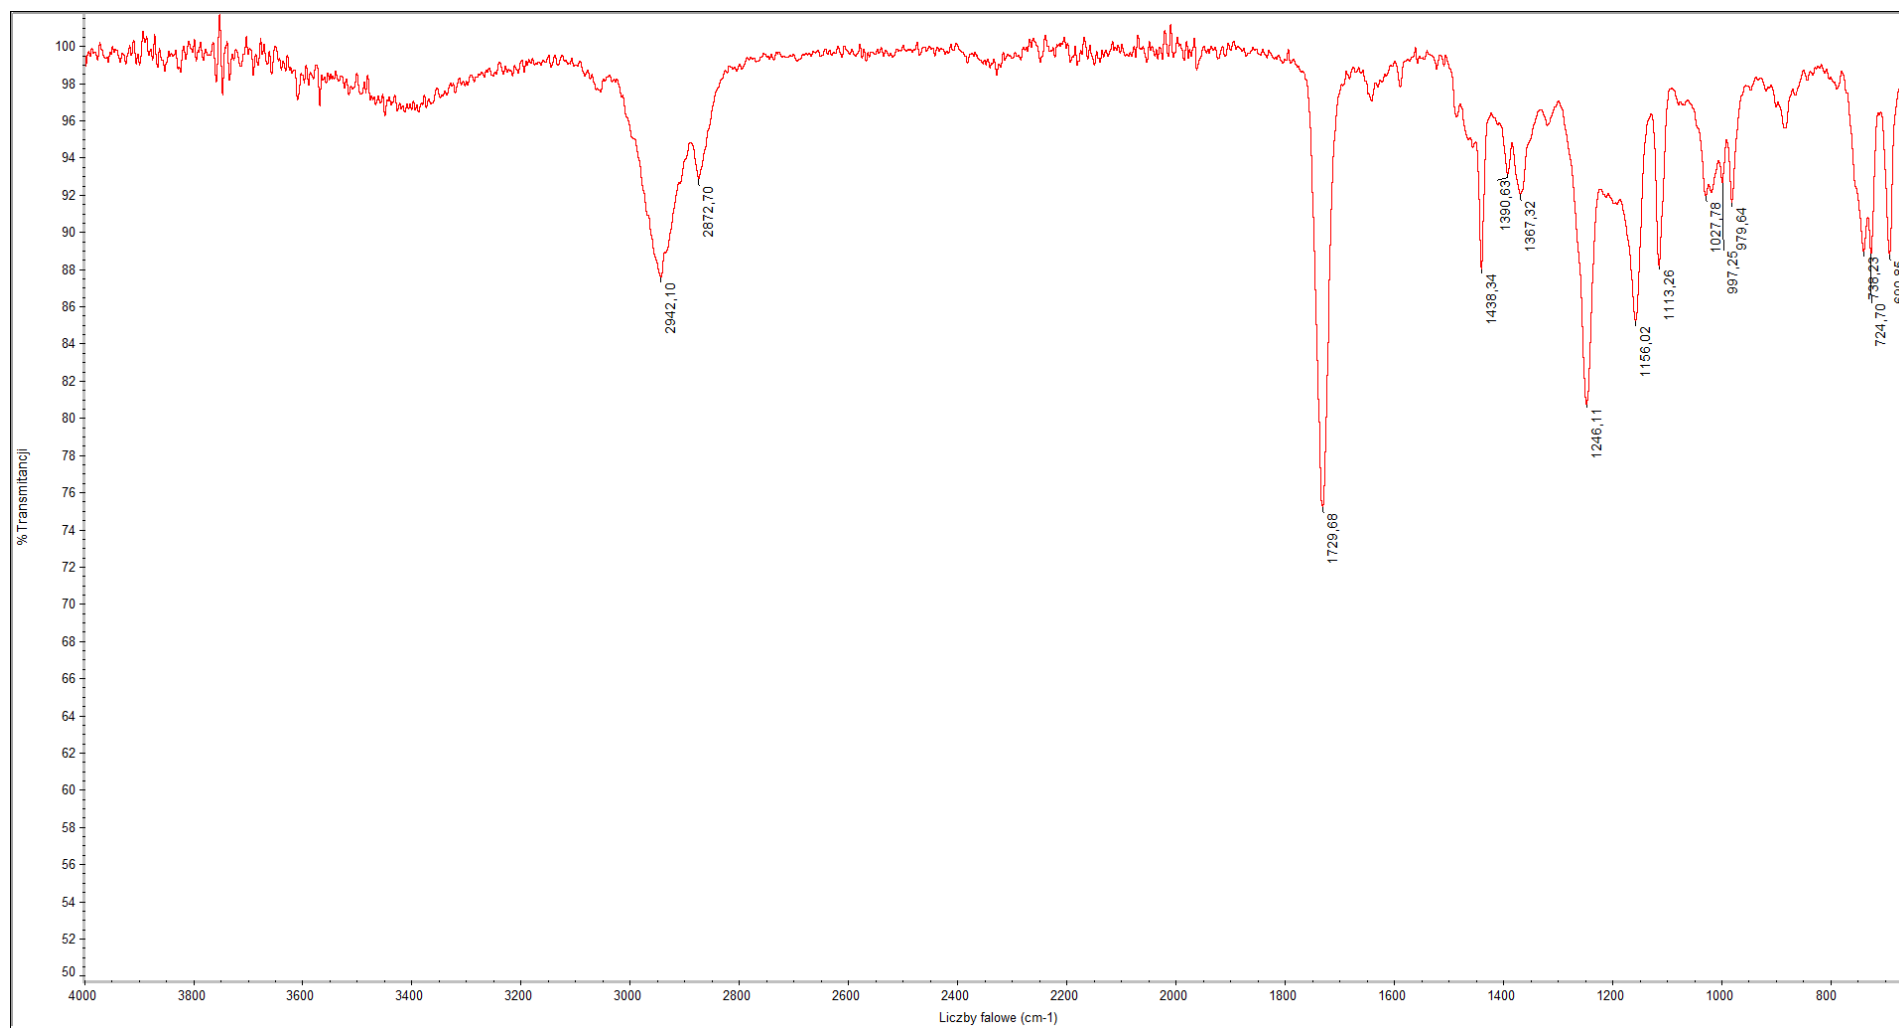

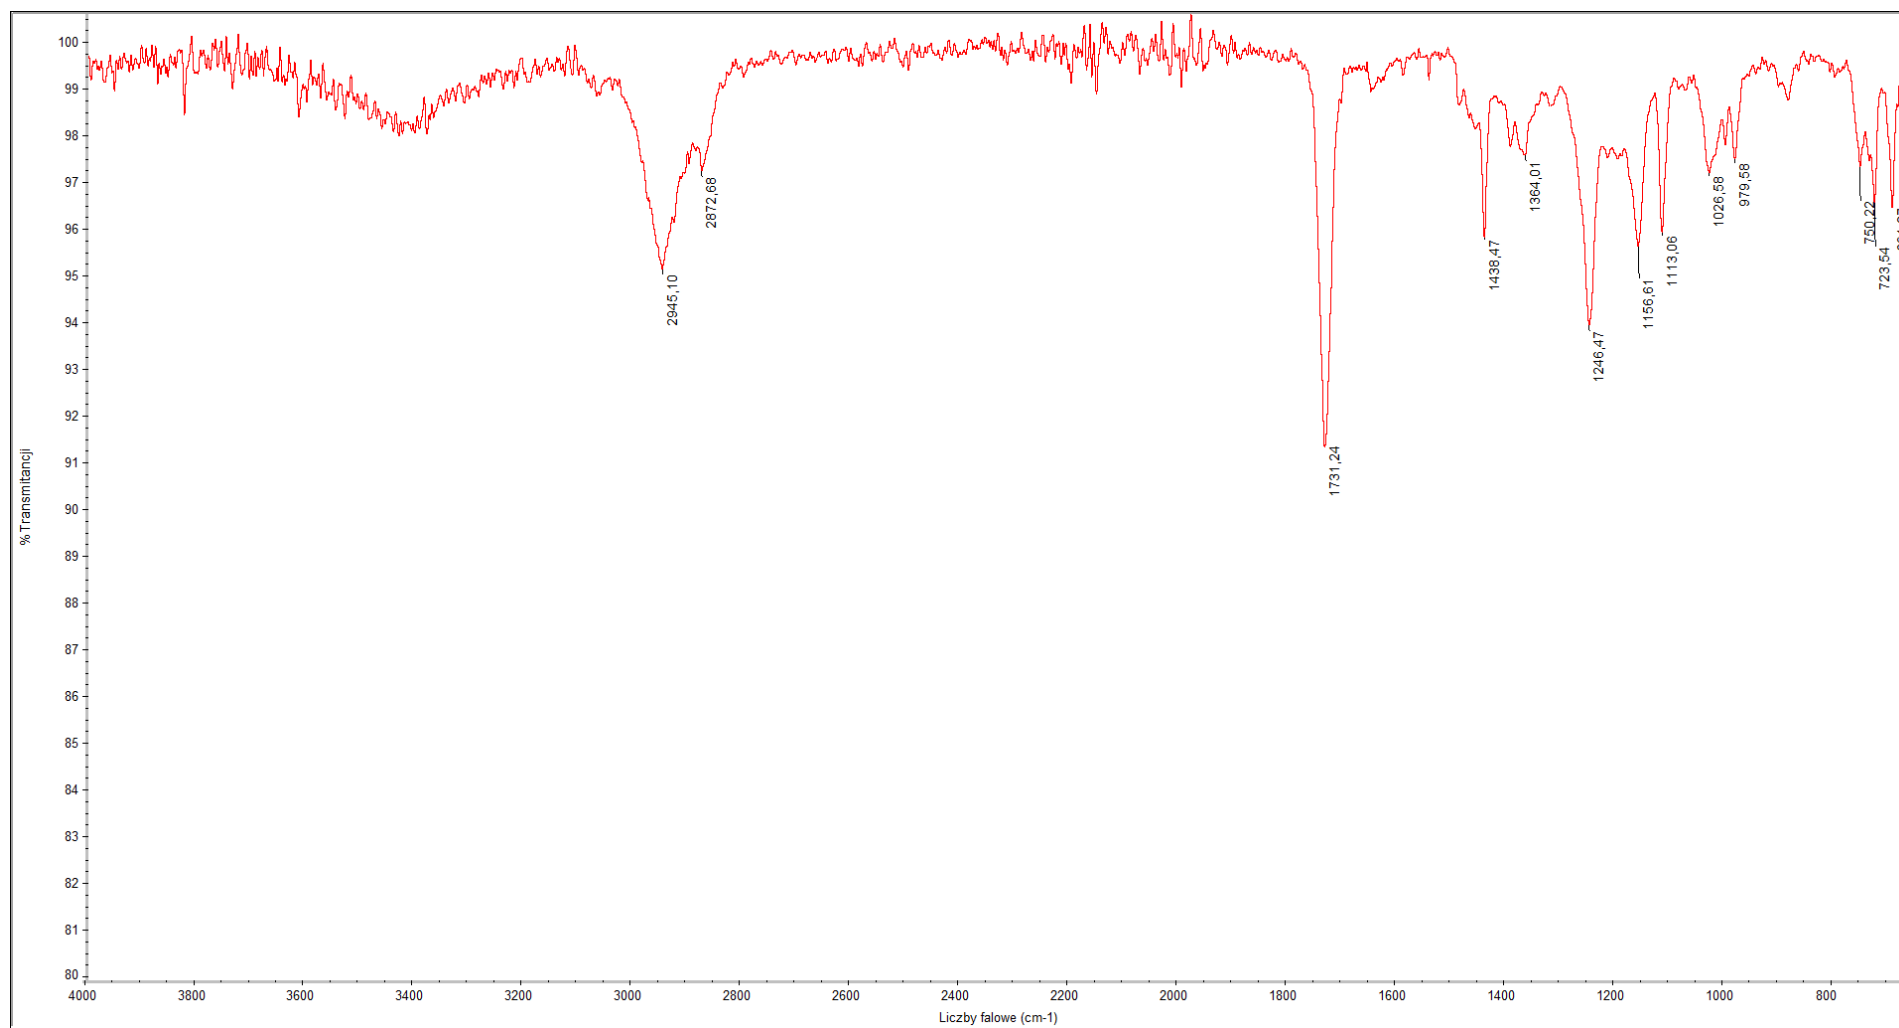

IR spectrum of product **7b**; ATR ( $\text{cm}^{-1}$ ).

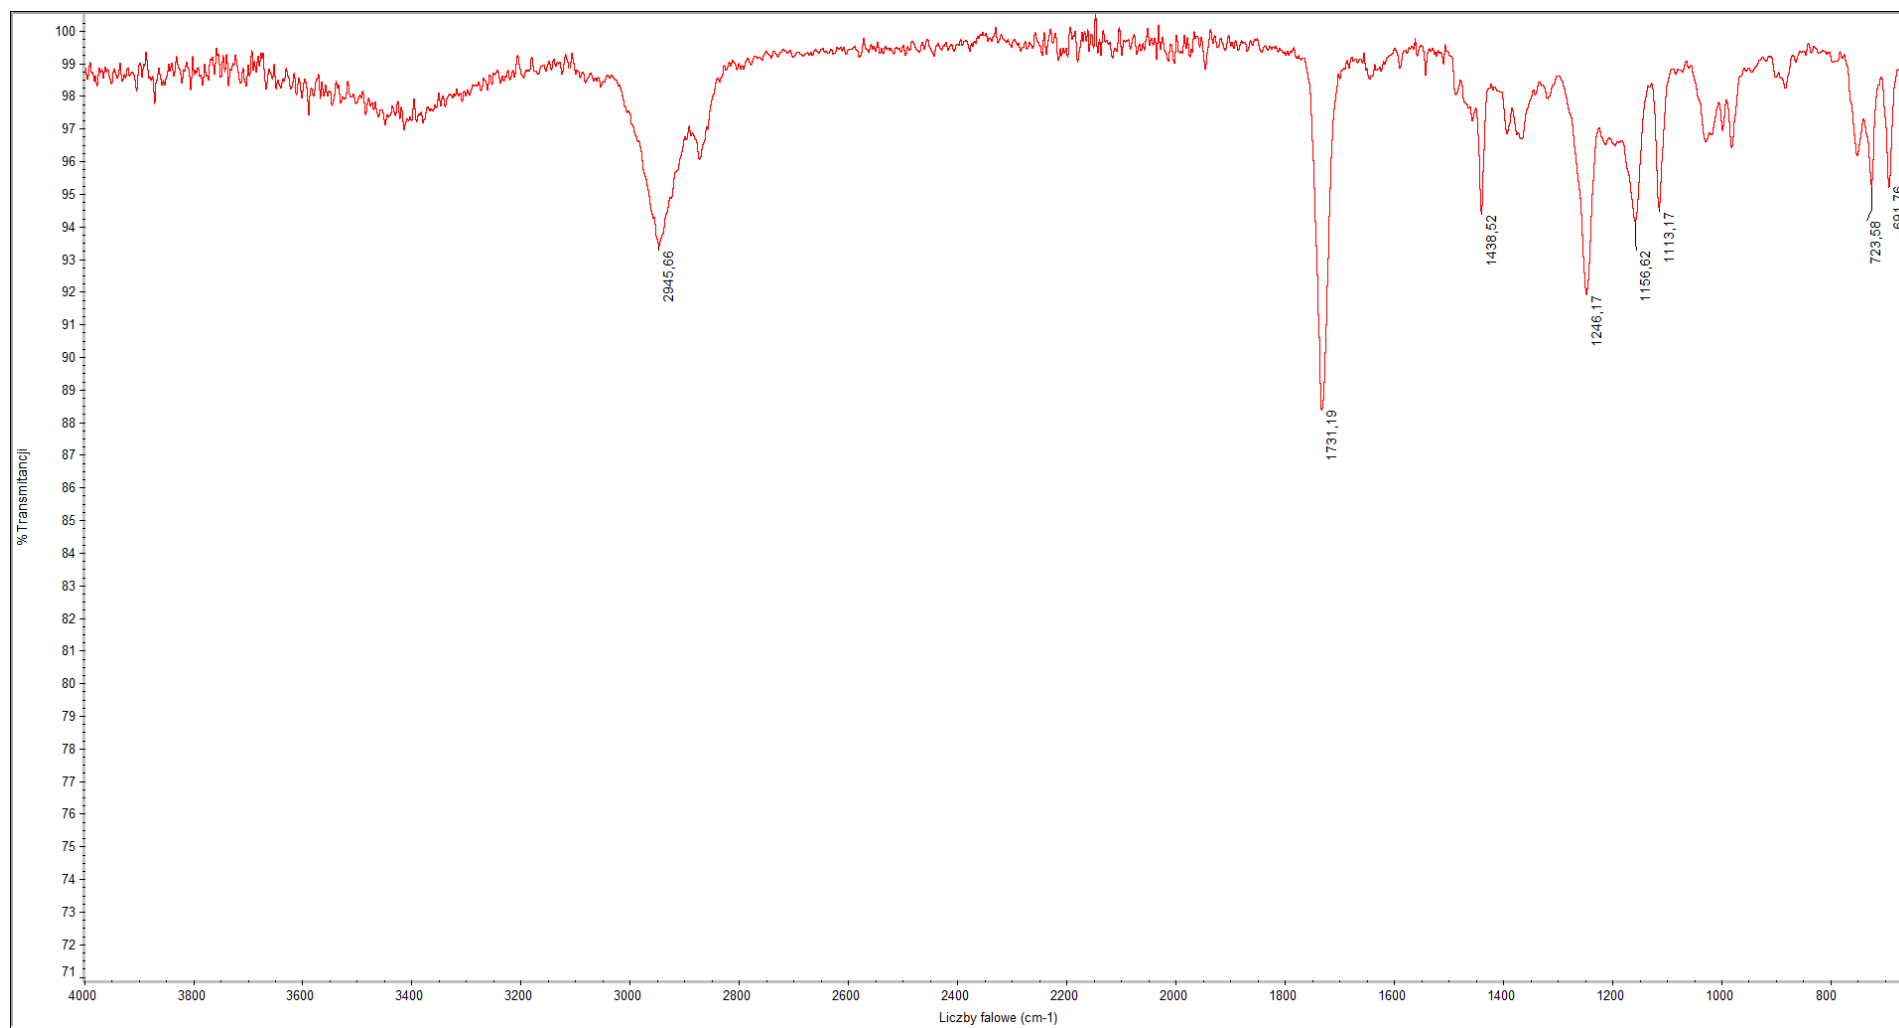

IR spectrum of product **7c**; ATR (cm<sup>-1</sup>).



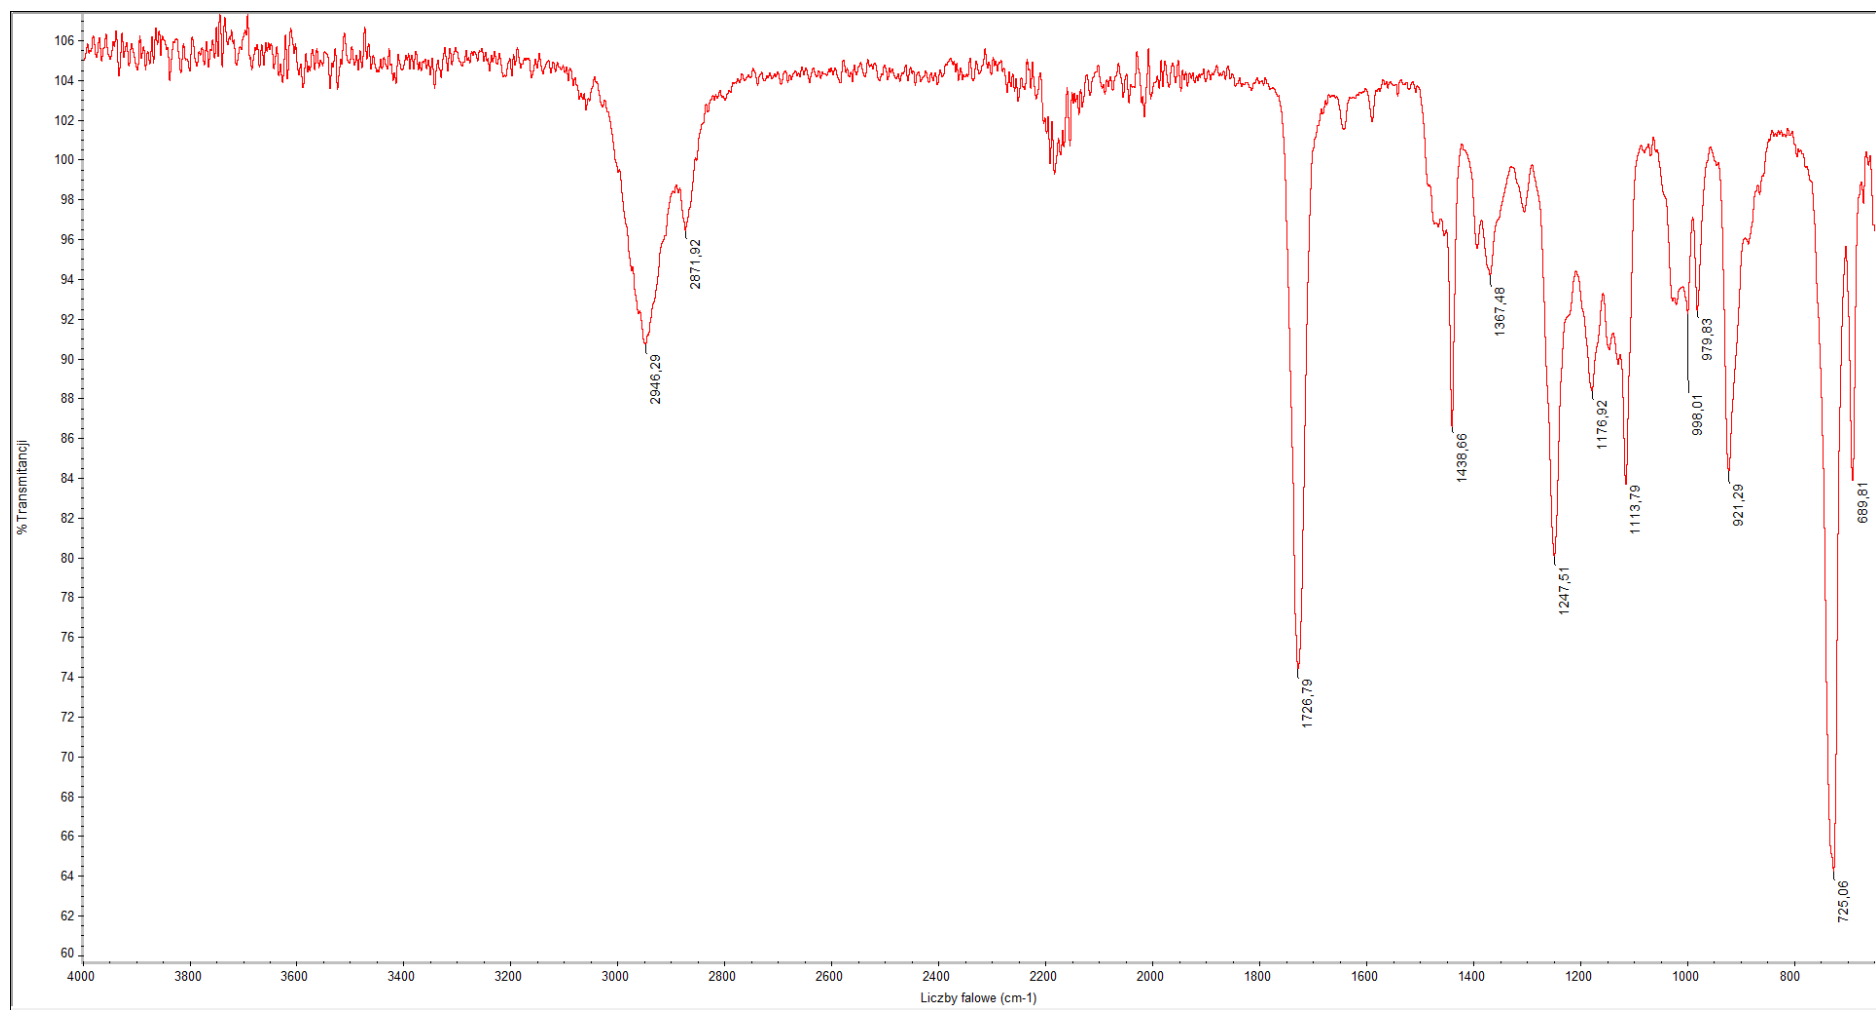

IR spectrum of product **7d**; ATR (cm<sup>-1</sup>).

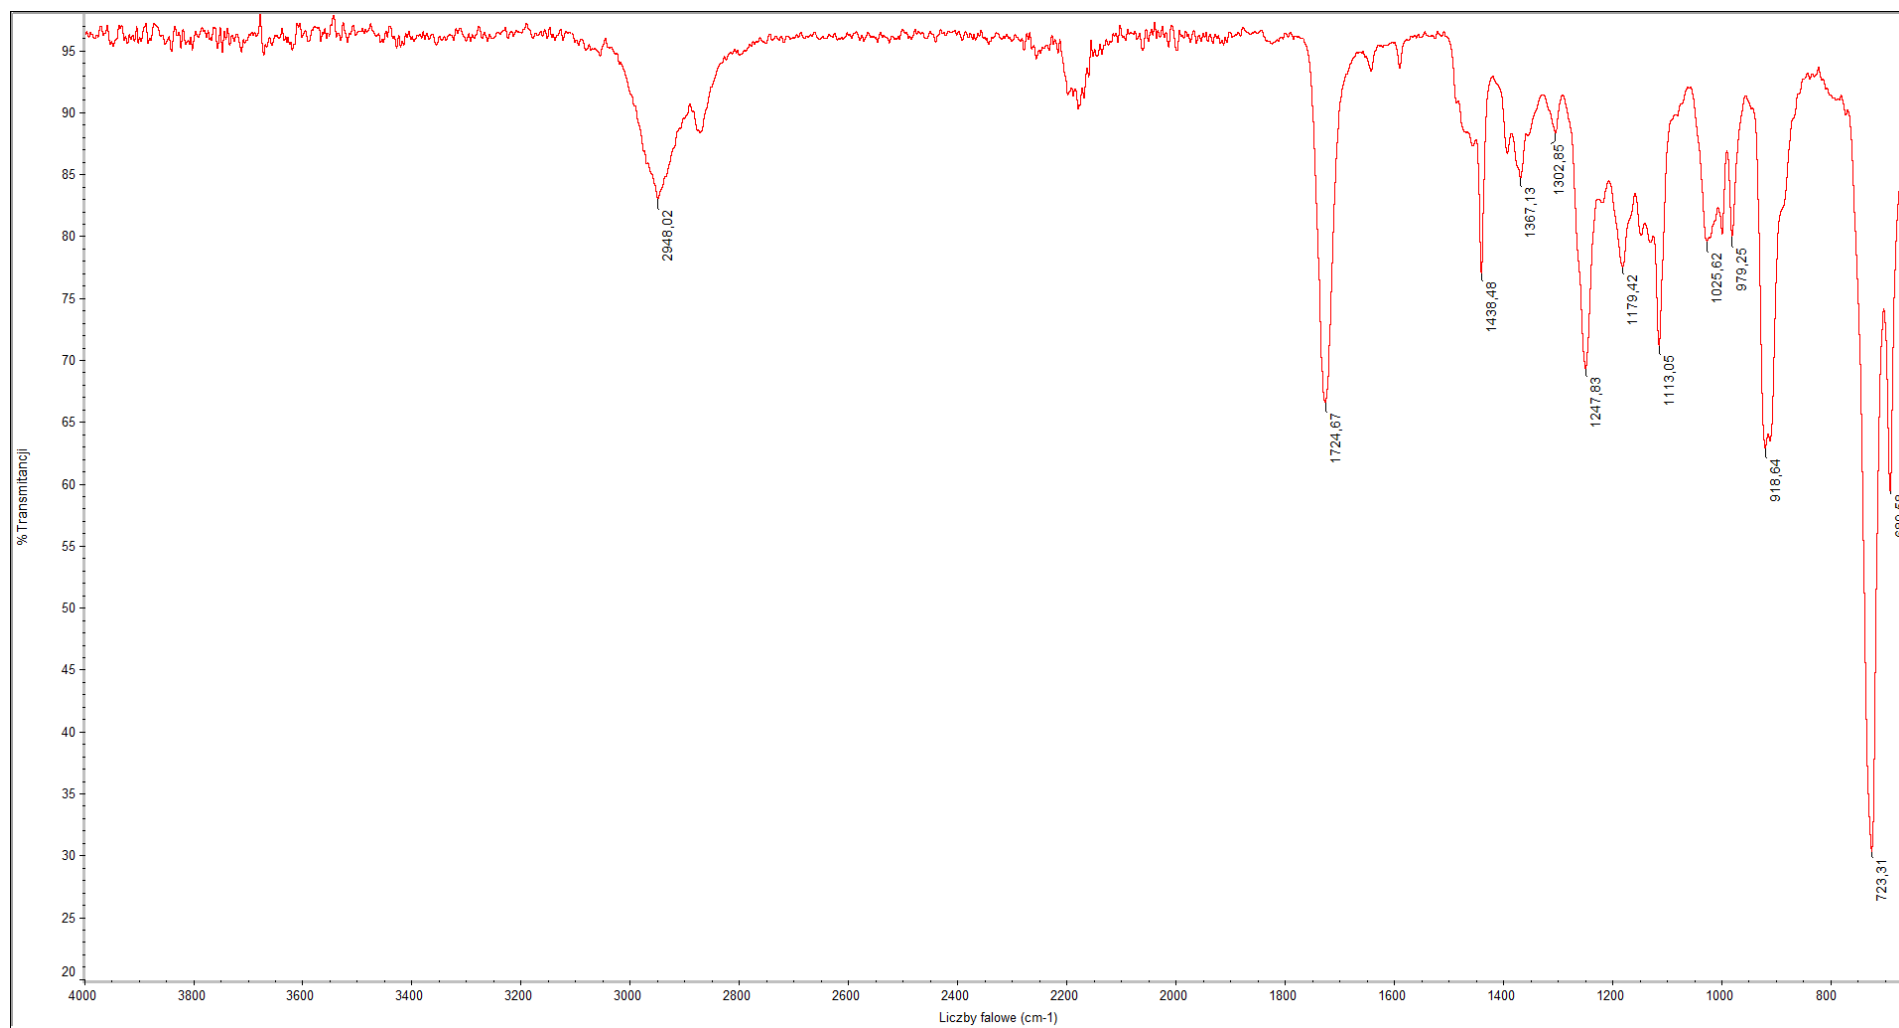

IR spectrum of product **7e**; ATR (cm<sup>-1</sup>).

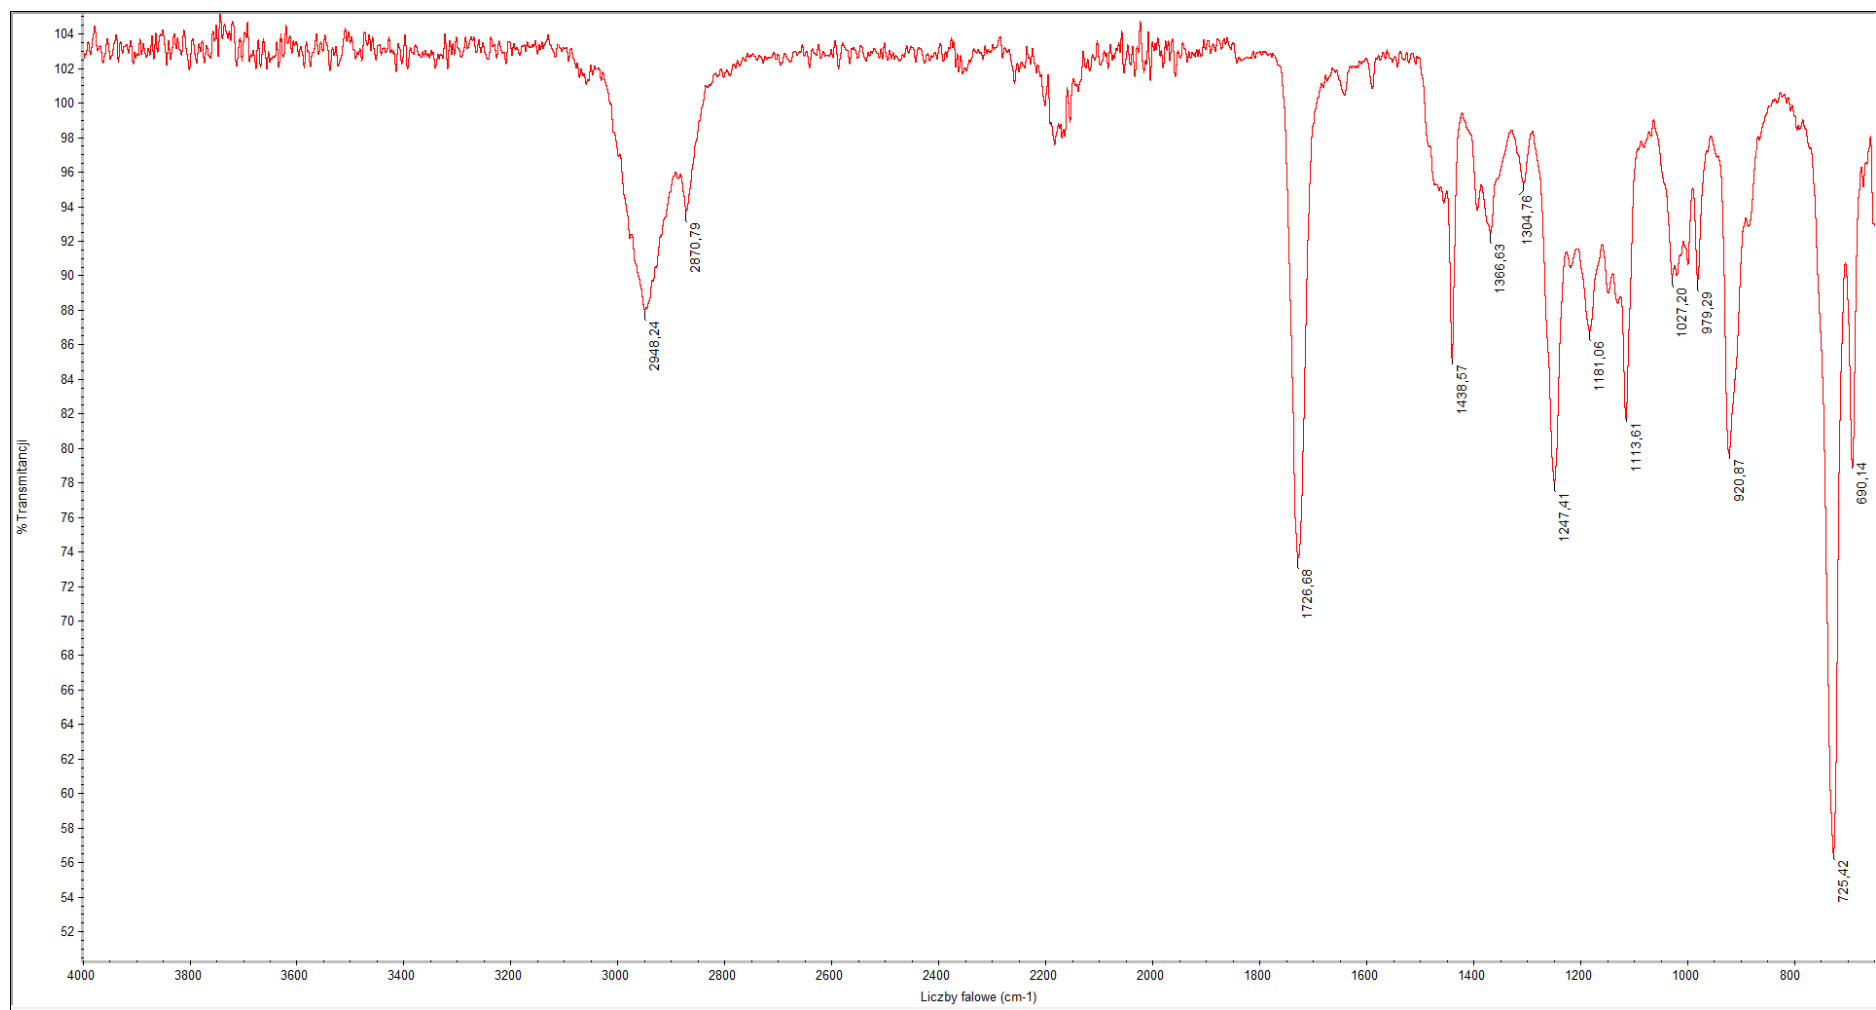

IR spectrum of product **7f**; ATR (cm<sup>-1</sup>).

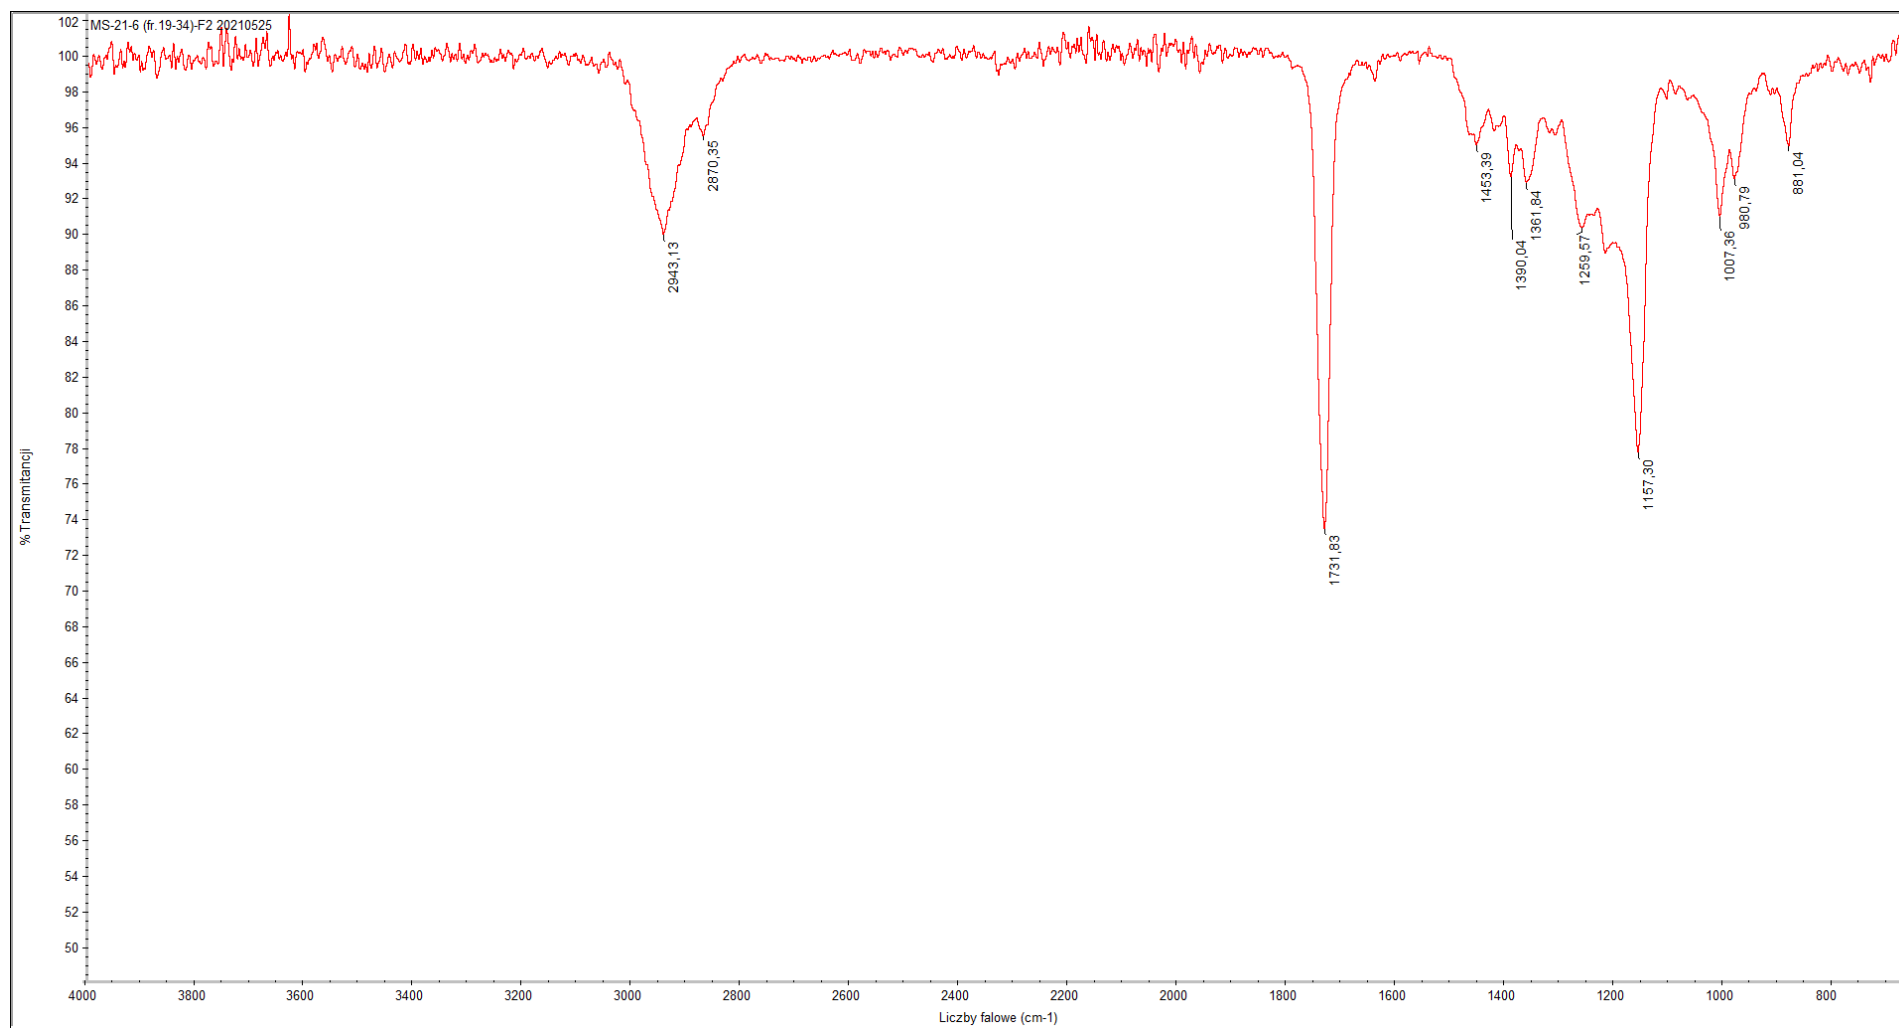

IR spectrum of product **8a**; ATR (cm<sup>-1</sup>).

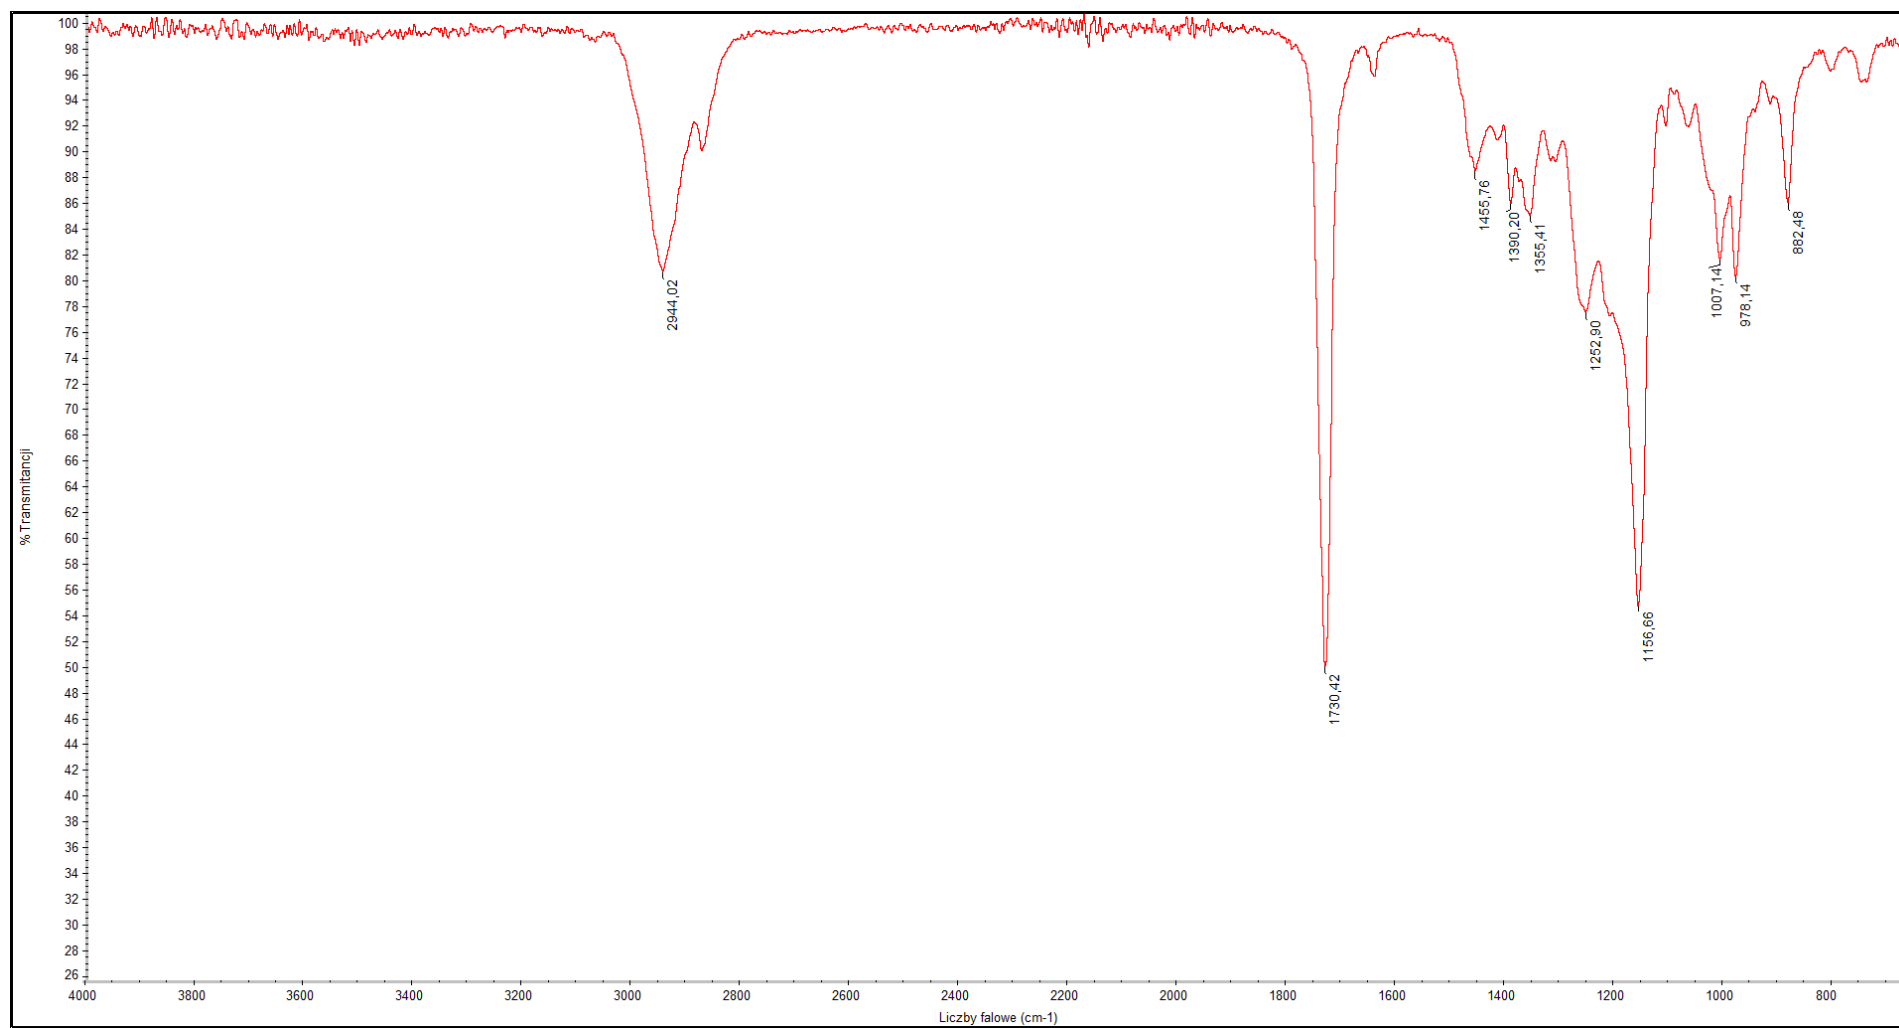

IR spectrum of product **8b**; ATR (cm<sup>-1</sup>).

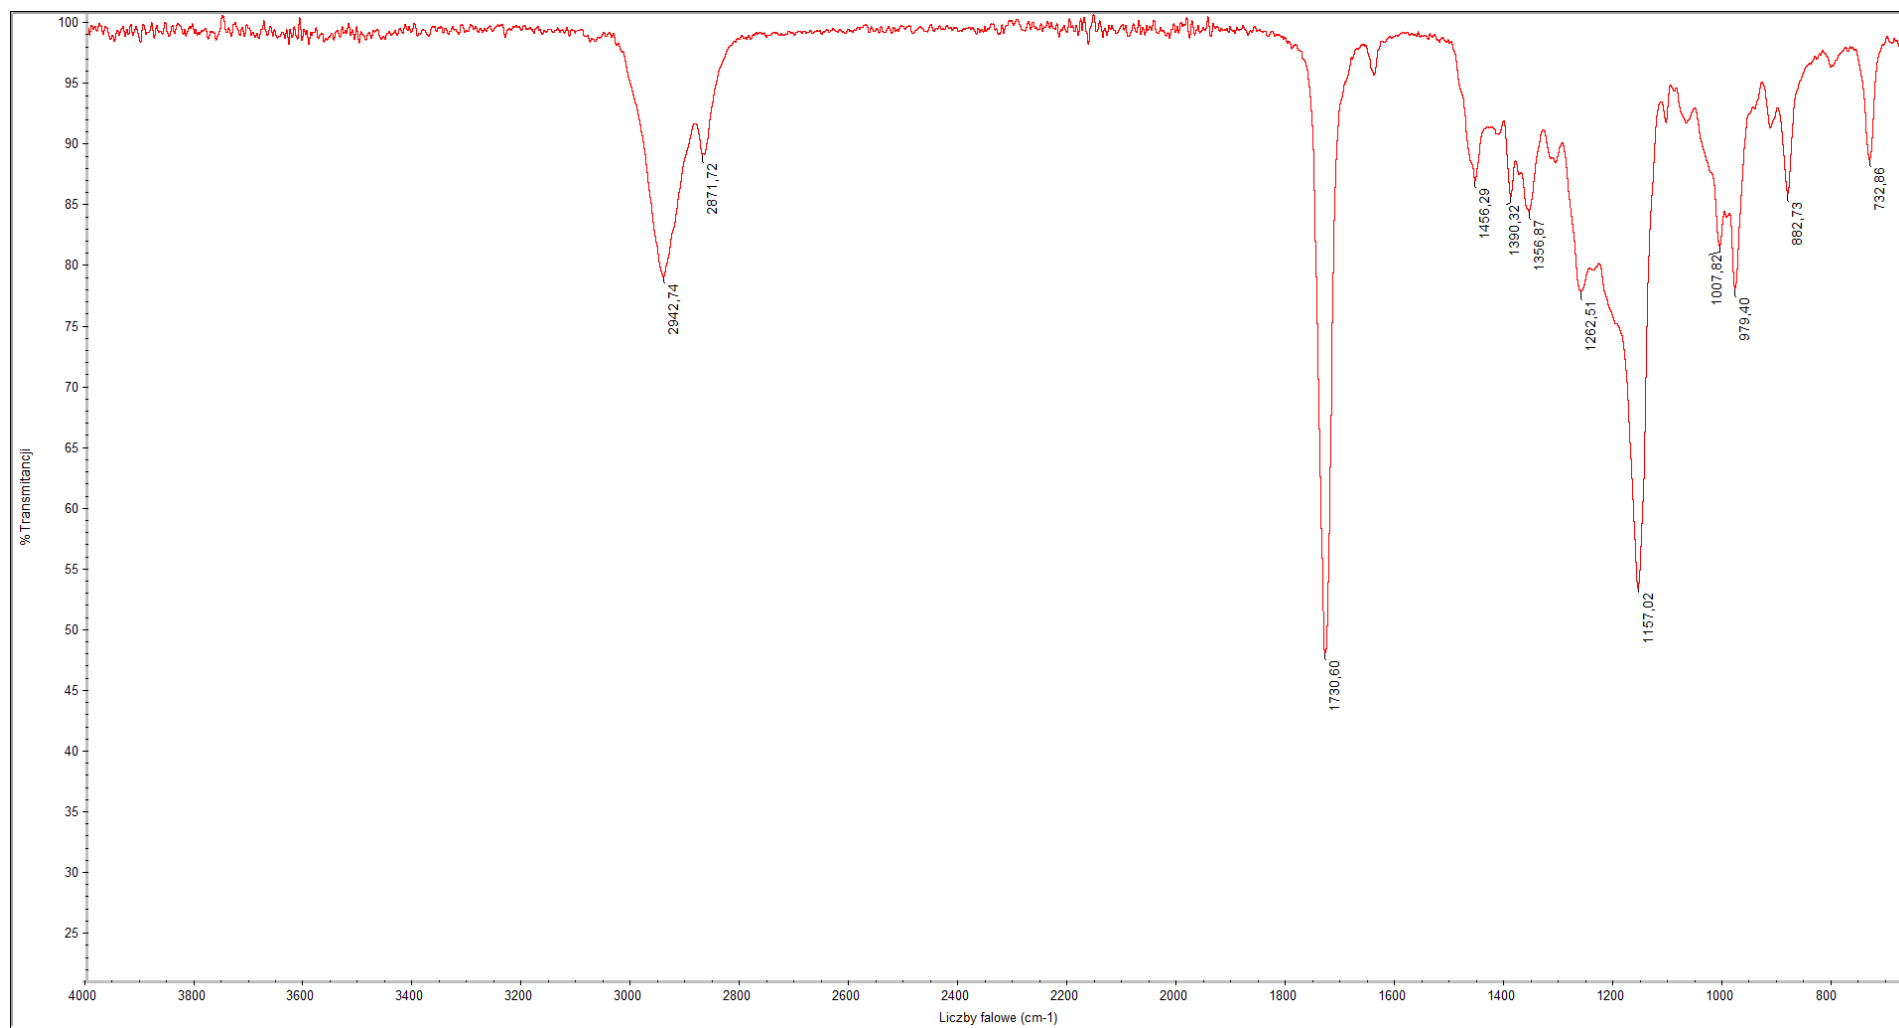

IR spectrum of product **8c**; ATR (cm<sup>-1</sup>).

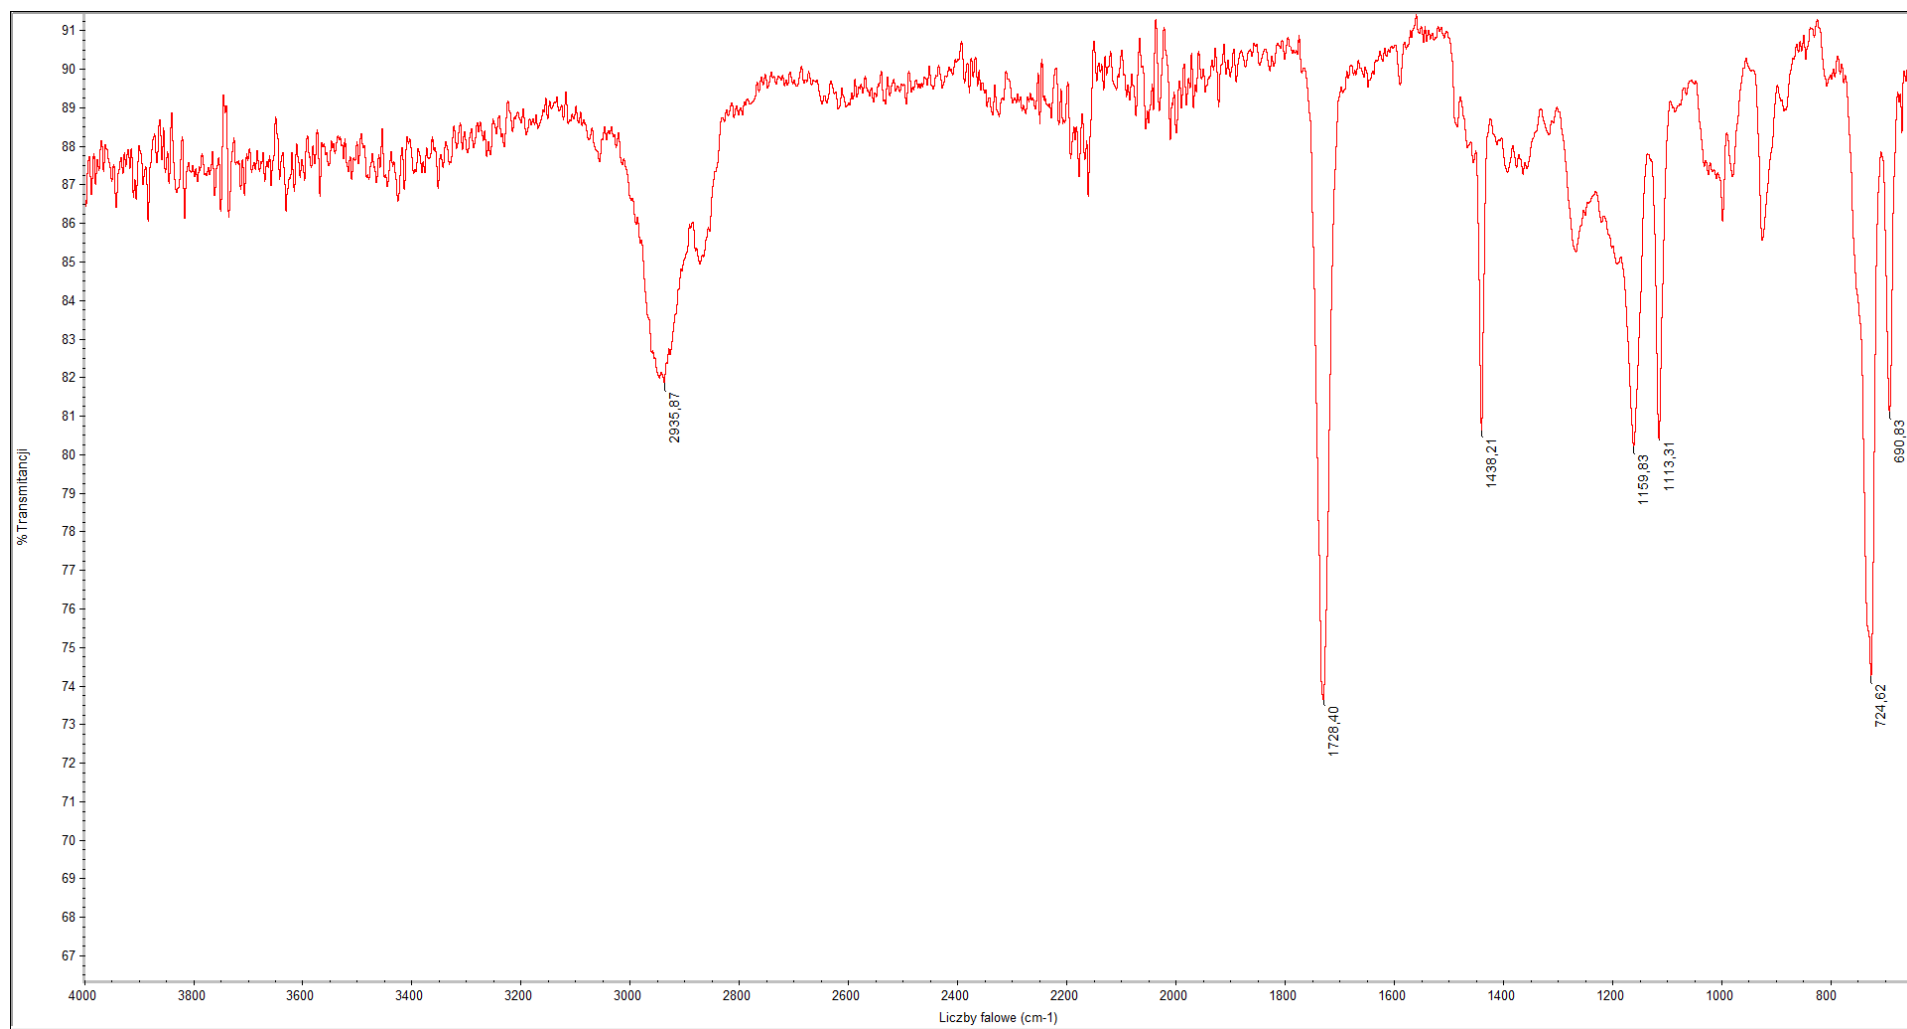

IR spectrum of product **9b**; ATR (cm<sup>-1</sup>).

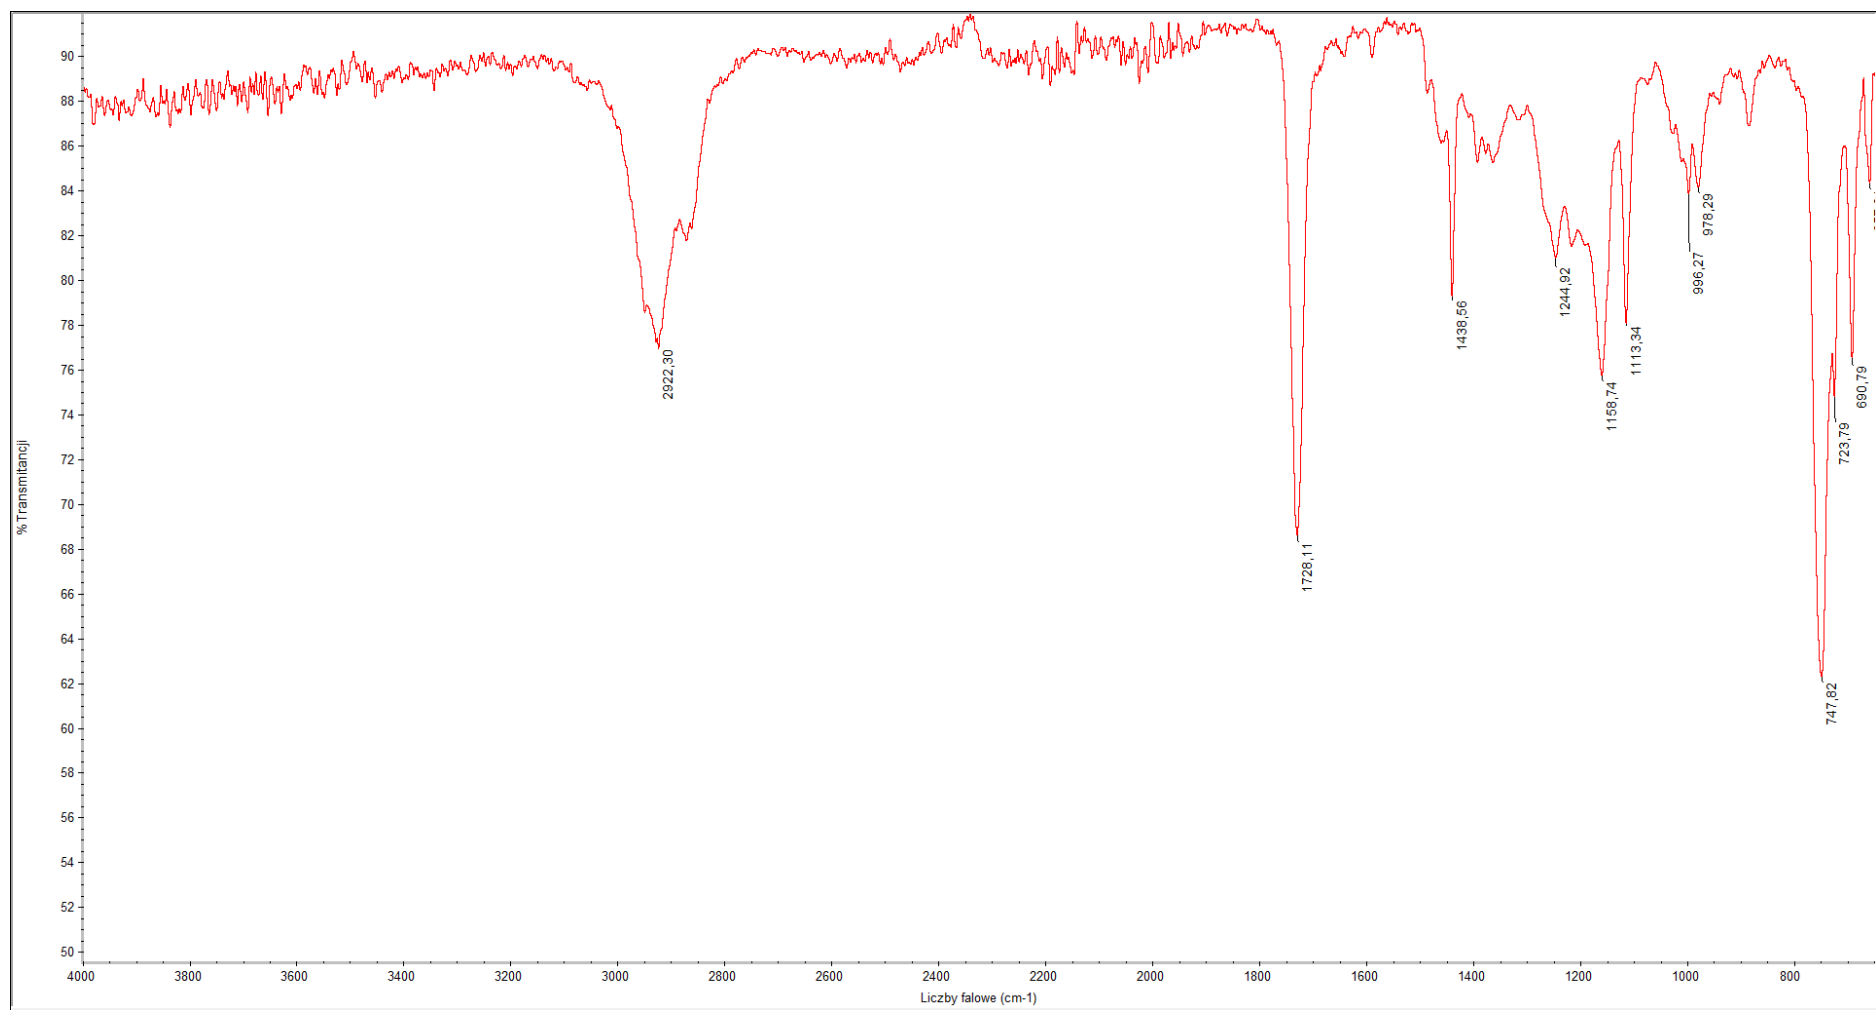

IR spectrum of product 9c; ATR (cm<sup>-1</sup>).
